# Supplementary material for: Genomic scans for selective sweeps through haplotype homozygosity and allelic fixation in 14 indigenous sheep breeds from Middle East and South Asia
Source: PubMed Central journal article supplement (PMC7854752; doi:10.1038/s41598-021-82625-2), 2021-02-02

# **Genomic scans for selective sweeps through haplotype homozygosity and allelic fixation in 14 indigenous sheep breeds from Middle East and South Asia**

Running Head: Selection signatures in indigenous sheep breeds

Sirous Eydivandi<sup>1,2</sup>, Mahmoud Amiri Roudbar<sup>3</sup>, Mohammad Osman Karimi<sup>4</sup>, and Goutam Sahana<sup>2</sup>

<sup>1</sup> Department of Animal Science, Behbahan Branch, Islamic Azad University, Behbahan, Iran

<sup>2</sup> Center for Quantitative Genetics and Genomics, Faculty of Technical Sciences, Aarhus University, 8830 Tjele, Denmark

<sup>3</sup> Department of Animal Science, Safiabad-Dezful Agricultural and Natural Resources Research and Education Center, Agricultural Research, Education & Extension Organization (AREEO), Dezful, Iran

<sup>4</sup> Department of Animal Science, Faculty of Agriculture, Herat University, Herat, Afghanistan

\*Correspondence:

Sirous Eydivandi

[sirous.eidivandi@qgg.au.dk](mailto:sirous.eidivandi@qgg.au.dk)

[sirouseidivandi@gmail.com](mailto:sirouseidivandi@gmail.com)

Supplementary Table S1. Top 1% genes as candidates for selective signals using Z(FST) test on 26 sheep autosomes for: a) IR and IN breeds, b) IR and AF breeds, c) IN and AF breeds.

| <b>a</b>            |           |            |           |          | <b>b</b>            |           |            |           |          | <b>c</b>            |           |            |           |          |
|---------------------|-----------|------------|-----------|----------|---------------------|-----------|------------|-----------|----------|---------------------|-----------|------------|-----------|----------|
| Gene.stable.ID      | Gene.name | Gene.start | Gene.end  | Chr.name | Gene.stable.ID      | Gene.name | Gene.start | Gene.end  | Chr.name | Gene.stable.ID      | Gene.name | Gene.start | Gene.end  | Chr.name |
| ENSOARG00000000493  |           | 18080828   | 18124219  | 1        | ENSOARG000000004384 | RPS6KA1   | 239443298  | 239467559 | 2        | ENSOARG000000004384 | RPS6KA1   | 239443298  | 239467559 | 2        |
| ENSOARG000000000515 | ST3GAL3   | 18120931   | 18347967  | 1        | ENSOARG000000007715 | KDM1A     | 242660932  | 242714290 | 2        | ENSOARG000000007440 | GRIN3A    | 21252157   | 21459411  | 2        |
| ENSOARG000000001069 | GOLIM4    | 217358248  | 217440402 | 1        | ENSOARG000000007814 | SYK       | 25701083   | 25759453  | 2        | ENSOARG000000007814 | SYK       | 25701083   | 25759453  | 2        |
| ENSOARG000000008995 | DNAJC13   | 255172444  | 255307652 | 1        | ENSOARG000000008084 | WNK2      | 28059615   | 28213657  | 2        | ENSOARG000000008084 | WNK2      | 28059615   | 28213657  | 2        |
| ENSOARG000000009414 | ATP2C1    | 256985186  | 257068039 | 1        | ENSOARG000000009010 | UBQLN1    | 35845653   | 35897664  | 2        | ENSOARG000000009010 | UBQLN1    | 35845653   | 35897664  | 2        |
| ENSOARG000000009979 |           | 258241417  | 258581681 | 1        | ENSOARG000000010998 | COL15A1   | 48487007   | 48588324  | 2        | ENSOARG000000009898 | GTDC1     | 164635825  | 164985339 | 2        |
| ENSOARG000000010761 | TMPRSS3   | 260732616  | 260756933 | 1        | ENSOARG000000011504 | ZCCHC7    | 51076086   | 51317595  | 2        | ENSOARG000000010706 | UBXN4     | 173931295  | 173953446 | 2        |
| ENSOARG000000016027 | USP25     | 139564863  | 139699601 | 1        | ENSOARG000000015710 | HERC2     | 112478388  | 112720769 | 2        | ENSOARG000000010998 | COL15A1   | 48487007   | 48588324  | 2        |
| ENSOARG000000017549 | DPYD      | 73433343   | 74364967  | 1        | ENSOARG000000025847 |           | 215173693  | 215317344 | 2        | ENSOARG000000011027 | RAB3GAP1  | 174458565  | 174694534 | 2        |
| ENSOARG000000020761 | TNIK      | 214087639  | 214487796 | 1        | ENSOARG00000002894  | RTN4      | 68869891   | 68943954  | 3        | ENSOARG000000011436 | MGAT5     | 175253426  | 175595136 | 2        |
| ENSOARG000000021060 | RORC      | 100648111  | 100672007 | 1        | ENSOARG000000007419 | ABL1      | 5731767    | 5765473   | 3        | ENSOARG000000012588 | CARNMT1   | 61274631   | 61304613  | 2        |
| ENSOARG000000021065 |           | 100680890  | 100831184 | 1        | ENSOARG000000008162 | MAP4K3    | 84680681   | 84866029  | 3        | ENSOARG000000015655 | OCA2      | 112126827  | 112463751 | 2        |
| ENSOARG000000025511 |           | 17971643   | 18117954  | 1        | ENSOARG000000008932 | ANO2      | 208302342  | 208641090 | 3        | ENSOARG000000015710 | HERC2     | 112478388  | 112720769 | 2        |
| ENSOARG00000002545  | EPB41     | 237305059  | 237487293 | 2        | ENSOARG000000010376 |           | 91050821   | 91234495  | 3        | ENSOARG000000016969 |           | 129907617  | 130149171 | 2        |
| ENSOARG000000006134 | AMBP      | 9583152    | 9609521   | 2        | ENSOARG000000011771 | TESPA1    | 164960462  | 164984444 | 3        | ENSOARG000000019232 | ERBB4     | 212081308  | 212484401 | 2        |
| ENSOARG000000008634 |           | 31239795   | 31476634  | 2        | ENSOARG000000014173 | ANO4      | 169622065  | 170061610 | 3        | ENSOARG000000020437 | DOCK10    | 225910579  | 226106181 | 2        |
| ENSOARG000000008659 | NEB       | 156650358  | 156853665 | 2        | ENSOARG000000014722 | UTP20     | 170228637  | 170315908 | 3        | ENSOARG000000025766 |           | 50388292   | 50508316  | 2        |
| ENSOARG000000008930 | RIF1      | 156861839  | 156919308 | 2        | ENSOARG000000015343 | GNPTAB    | 170615182  | 170667987 | 3        | ENSOARG00000002894  | RTN4      | 68869891   | 68943954  | 3        |
| ENSOARG000000009251 | DNAI1     | 36819526   | 36890350  | 2        | ENSOARG000000017314 | GALNT6    | 134693949  | 134722893 | 3        | ENSOARG000000007419 | ABL1      | 5731767    | 5765473   | 3        |
| ENSOARG000000009977 | ADAM7     | 41012453   | 41069859  | 2        | ENSOARG000000018354 |           | 32668067   | 32874601  | 3        | ENSOARG000000009846 | GPATCH11  | 86879693   | 86887627  | 3        |
| ENSOARG000000011436 | MGAT5     | 175253426  | 175595136 | 2        | ENSOARG000000019050 | NCF4      | 180081443  | 180103379 | 3        | ENSOARG000000012360 | ELK3      | 165522205  | 165579438 | 3        |
| ENSOARG000000012027 |           | 52695717   | 52765806  | 2        | ENSOARG000000019095 | CSF2RB    | 180166727  | 180179868 | 3        | ENSOARG000000014722 | UTP20     | 170228637  | 170315908 | 3        |
| ENSOARG000000014195 | TMEFF2    | 193228532  | 193510876 | 2        | ENSOARG000000019458 | BABAM2    | 34767758   | 35168619  | 3        | ENSOARG000000015054 | PPP1R12A  | 115651729  | 115819054 | 3        |
| ENSOARG000000015036 | HMBOX1    | 102231442  | 102383638 | 2        | ENSOARG000000019564 | TMTC1     | 184510212  | 184836655 | 3        | ENSOARG000000015343 | GNPTAB    | 170615182  | 170667987 | 3        |
| ENSOARG000000016867 | ITGA4     | 127163497  | 127254486 | 2        | ENSOARG000000019999 | KRAS      | 189578775  | 189614533 | 3        | ENSOARG000000018354 |           | 32668067   | 32874601  | 3        |
| ENSOARG000000017979 | NBEAL1    | 204016478  | 204166655 | 2        | ENSOARG000000001140 |           | 112262485  | 112438114 | 4        | ENSOARG000000019050 | NCF4      | 180081443  | 180103379 | 3        |
| ENSOARG000000022859 | U6        | 91862325   | 91862426  | 2        | ENSOARG000000002931 | DOCK4     | 56152727   | 56624017  | 4        | ENSOARG000000019095 | CSF2RB    | 180166727  | 180179868 | 3        |
| ENSOARG000000025733 |           | 954711     | 1233648   | 2        | ENSOARG000000006085 |           | 95239604   | 95287750  | 4        | ENSOARG000000019300 | PFKM      | 138238132  | 138280543 | 3        |
| ENSOARG000000025798 |           | 114046190  | 114223286 | 2        | ENSOARG000000006901 | THSD7A    | 19499637   | 19777463  | 4        | ENSOARG000000019458 | BABAM2    | 34767758   | 35168619  | 3        |
| ENSOARG000000001844 | VRK2      | 65858703   | 65955917  | 3        | ENSOARG000000007096 | PDE1C     | 64359063   | 64669363  | 4        | ENSOARG000000019622 | NELL2     | 141536582  | 141928837 | 3        |
| ENSOARG000000002277 |           | 1442982    | 2818577   | 3        | ENSOARG000000008903 |           | 66590322   | 66929661  | 4        | ENSOARG000000019909 | ITPR2     | 187771324  | 188372241 | 3        |

|                    |          |           |           |   |                    |         |           |           |   |                    |          |           |           |   |
|--------------------|----------|-----------|-----------|---|--------------------|---------|-----------|-----------|---|--------------------|----------|-----------|-----------|---|
| ENSOARG00000015027 | SYT1     | 114906496 | 115404501 | 3 | ENSOARG00000013495 |         | 2255574   | 2448893   | 4 | ENSOARG00000019999 | KRAS     | 189578775 | 189614533 | 3 |
| ENSOARG00000015359 | LRRIQ1   | 121148785 | 121363705 | 3 | ENSOARG00000013517 |         | 3629296   | 3769877   | 4 | ENSOARG00000002931 | DOCK4    | 56152727  | 56624017  | 4 |
| ENSOARG00000015702 | EPYC     | 127257338 | 127295253 | 3 | ENSOARG00000014780 | ELAPOR2 | 33294019  | 33512918  | 4 | ENSOARG00000006085 |          | 95239604  | 95287750  | 4 |
| ENSOARG00000016814 | TXNRD1   | 172982661 | 173042110 | 3 | ENSOARG00000014903 | GRM3    | 33520799  | 33628582  | 4 | ENSOARG00000006427 | PLXNA4   | 95788312  | 96204055  | 4 |
| ENSOARG00000017296 | NUAK1    | 174550166 | 174621290 | 3 | ENSOARG00000017010 | AKAP9   | 9183142   | 9351553   | 4 | ENSOARG00000008198 | AGMO     | 23650918  | 24047746  | 4 |
| ENSOARG00000017344 | BIN2     | 134750526 | 134787072 | 3 | ENSOARG00000017240 | HECW1   | 77592533  | 77851748  | 4 | ENSOARG00000009409 | SNX13    | 26371787  | 26467169  | 4 |
| ENSOARG00000019300 | PFKM     | 138238132 | 138280543 | 3 | ENSOARG00000017420 | GLI3    | 79029288  | 79131016  | 4 | ENSOARG00000009641 | HDAC9    | 27257256  | 27548397  | 4 |
| ENSOARG00000019311 | SENP1    | 138282207 | 138331370 | 3 | ENSOARG00000017524 | MAGI2   | 42637311  | 43299968  | 4 | ENSOARG00000013517 |          | 3629296   | 3769877   | 4 |
| ENSOARG00000019534 | IPO8     | 183547488 | 183614465 | 3 | ENSOARG00000018237 | TCAF1   | 106458935 | 106491976 | 4 | ENSOARG00000014026 | CROT     | 32985882  | 33035073  | 4 |
| ENSOARG00000019578 | ANO6     | 140942833 | 141115777 | 3 | ENSOARG00000025211 |         | 3683214   | 3745148   | 4 | ENSOARG00000014903 | GRM3     | 33520799  | 33628582  | 4 |
| ENSOARG00000019622 | NELL2    | 141536582 | 141928837 | 3 | ENSOARG00000001932 | COMMD10 | 35086709  | 35265384  | 5 | ENSOARG00000016384 | CDK14    | 7873876   | 8511553   | 4 |
| ENSOARG00000019717 | ADAMTS20 | 142961377 | 143166195 | 3 | ENSOARG00000013615 | FSTL4   | 42210002  | 42682576  | 5 | ENSOARG00000017240 | HECW1    | 77592533  | 77851748  | 4 |
| ENSOARG00000020390 | SLCO1A2  | 193610779 | 193663029 | 3 | ENSOARG00000015922 | ICAM3   | 12546272  | 12554248  | 5 | ENSOARG00000017420 | GLI3     | 79029288  | 79131016  | 4 |
| ENSOARG00000020802 | GRIN2B   | 200689548 | 201197462 | 3 | ENSOARG00000017050 | SLC27A6 | 22582095  | 22657624  | 5 | ENSOARG00000025211 |          | 3683214   | 3745148   | 4 |
| ENSOARG00000026040 |          | 174577386 | 174723159 | 3 | ENSOARG00000017454 | SMARCA4 | 13107775  | 13181922  | 5 | ENSOARG00000013341 |          | 11795634  | 12084118  | 5 |
| ENSOARG00000014574 | DMTF1    | 33148768  | 33195015  | 4 | ENSOARG00000018880 | MAN2A1  | 105984860 | 106179347 | 5 | ENSOARG00000015922 | ICAM3    | 12546272  | 12554248  | 5 |
| ENSOARG00000018572 | CDK6     | 9837145   | 10086661  | 4 | ENSOARG00000005149 | KCNIP4  | 40156628  | 40399467  | 6 | ENSOARG00000016502 | ADGRV1   | 87500637  | 88022830  | 5 |
| ENSOARG00000012274 | TBXA2R   | 17893368  | 17899126  | 5 | ENSOARG00000006066 | JAKMIP1 | 102735767 | 102808907 | 6 | ENSOARG00000017050 | SLC27A6  | 22582095  | 22657624  | 5 |
| ENSOARG00000016418 |          | 20379609  | 20597764  | 5 | ENSOARG00000010430 | PPA2    | 19864955  | 19945670  | 6 | ENSOARG00000005149 | KCNIP4   | 40156628  | 40399467  | 6 |
| ENSOARG00000017521 | HBEGF    | 48917000  | 48951593  | 5 | ENSOARG00000012378 | SLC4A4  | 86143053  | 86457688  | 6 | ENSOARG00000006066 | JAKMIP1  | 102735767 | 102808907 | 6 |
| ENSOARG00000018880 | MAN2A1   | 105984860 | 106179347 | 5 | ENSOARG00000014034 | DNAJB14 | 24829721  | 24873057  | 6 | ENSOARG00000009491 | DTHD1    | 55697169  | 55784117  | 6 |
| ENSOARG00000018924 | TMEM232  | 106642215 | 106911809 | 5 | ENSOARG00000014880 | MTHFD2L | 88783856  | 88905590  | 6 | ENSOARG00000010289 | ARHGEF38 | 19650992  | 19793944  | 6 |
| ENSOARG00000025296 |          | 17857816  | 17992134  | 5 | ENSOARG00000003285 | EML5    | 97190353  | 97312451  | 7 | ENSOARG00000010430 | PPA2     | 19864955  | 19945670  | 6 |
| ENSOARG00000000537 | ANK2     | 12362227  | 12719843  | 6 | ENSOARG00000018551 |         | 15384728  | 15392155  | 7 | ENSOARG00000010632 | TET2     | 20055989  | 20147275  | 6 |
| ENSOARG00000003887 | MAPK10   | 100456410 | 100650949 | 6 | ENSOARG00000020735 | ZNF609  | 42475435  | 42642760  | 7 | ENSOARG00000014880 | MTHFD2L  | 88783856  | 88905590  | 6 |
| ENSOARG00000005149 | KCNIP4   | 40156628  | 40399467  | 6 | ENSOARG00000020996 | ATP8B4  | 57145756  | 57436036  | 7 | ENSOARG00000003285 | EML5     | 97190353  | 97312451  | 7 |
| ENSOARG00000007185 | STK32B   | 103332684 | 103713145 | 6 | ENSOARG00000021121 | RTN1    | 68766907  | 68890740  | 7 | ENSOARG00000020893 | PRTG     | 51635068  | 51773448  | 7 |
| ENSOARG00000010430 | PPA2     | 19864955  | 19945670  | 6 | ENSOARG00000021191 | SLC8A3  | 78697982  | 78837399  | 7 | ENSOARG00000003278 | CCDC170  | 75143193  | 75234117  | 8 |
| ENSOARG00000010632 | TET2     | 20055989  | 20147275  | 6 | ENSOARG00000026710 |         | 57124667  | 57275633  | 7 | ENSOARG00000004895 | RPS6KA2  | 88034242  | 88188079  | 8 |
| ENSOARG00000018214 | CWH43    | 67594632  | 67647488  | 6 | ENSOARG00000001332 | VTA1    | 66565201  | 66637042  | 8 | ENSOARG00000009159 |          | 21064326  | 21097808  | 8 |
| ENSOARG00000003122 | SPATA7   | 96996666  | 97038856  | 7 | ENSOARG00000004895 | RPS6KA2 | 88034242  | 88188079  | 8 | ENSOARG00000012911 | RNGTT    | 48260082  | 48482195  | 8 |
| ENSOARG00000003198 |          | 97148925  | 97186147  | 7 | ENSOARG00000006899 | PHIP    | 5690526   | 5800596   | 8 | ENSOARG00000027019 |          | 44471402  | 44496409  | 8 |
| ENSOARG00000003343 | TTC8     | 97364708  | 97423931  | 7 | ENSOARG00000009159 |         | 21064326  | 21097808  | 8 | ENSOARG00000027025 |          | 48627836  | 48706773  | 8 |
| ENSOARG00000016888 | IQGAP2   | 7424541   | 7731473   | 7 | ENSOARG00000011435 | HACE1   | 32254404  | 32381662  | 8 | ENSOARG00000009003 | TRIQK    | 83920585  | 84012541  | 9 |

|                    |         |          |          |    |                    |          |          |          |    |                    |          |          |          |    |
|--------------------|---------|----------|----------|----|--------------------|----------|----------|----------|----|--------------------|----------|----------|----------|----|
| ENSOARG00000020851 |         | 48514282 | 48670343 | 7  | ENSOARG00000012246 |          | 44791678 | 45077954 | 8  | ENSOARG00000009412 | FER1L6   | 28725879 | 28908736 | 9  |
| ENSOARG00000020856 | LIPC    | 48680866 | 48853721 | 7  | ENSOARG00000012911 | RNGTT    | 48260082 | 48482195 | 8  | ENSOARG00000009876 | ANXA13   | 29008574 | 29052918 | 9  |
| ENSOARG00000021121 | RTN1    | 68766907 | 68890740 | 7  | ENSOARG00000001692 | RGS22    | 76870092 | 77006581 | 9  | ENSOARG00000010674 | EIF3H    | 60424730 | 60523273 | 9  |
| ENSOARG00000021126 | PPM1A   | 69387661 | 69436582 | 7  | ENSOARG00000009003 | TRIQK    | 83920585 | 84012541 | 9  | ENSOARG00000011267 | CSMD3    | 63608850 | 65007715 | 9  |
| ENSOARG00000002348 | STXBP5  | 71462635 | 71627320 | 8  | ENSOARG00000009876 | ANXA13   | 29008574 | 29052918 | 9  | ENSOARG00000000718 | TGDS     | 69480374 | 69590150 | 10 |
| ENSOARG00000002626 | ZC3H12D | 73543092 | 73565983 | 8  | ENSOARG00000010674 | EIF3H    | 60424730 | 60523273 | 9  | ENSOARG00000006244 | TDRD3    | 1835291  | 2065511  | 10 |
| ENSOARG00000004773 | AGPAT4  | 83449093 | 83583173 | 8  | ENSOARG00000000718 | TGDS     | 69480374 | 69590150 | 10 | ENSOARG00000008433 | TMCO3    | 86021273 | 86037791 | 10 |
| ENSOARG00000004788 |         | 83818709 | 84599387 | 8  | ENSOARG00000006515 | COL4A2   | 84344246 | 84506524 | 10 | ENSOARG00000002872 | MBTD1    | 35042066 | 35112724 | 11 |
| ENSOARG00000007878 | NCOA7   | 12446609 | 12579375 | 8  | ENSOARG00000008433 | TMCO3    | 86021273 | 86037791 | 10 | ENSOARG00000007848 |          | 7641415  | 8038744  | 11 |
| ENSOARG00000027033 |         | 55303220 | 55340228 | 8  | ENSOARG00000007848 |          | 7641415  | 8038744  | 11 | ENSOARG00000017855 | CHD3     | 27132435 | 27152030 | 11 |
| ENSOARG00000004022 | TRAPPC9 | 16049980 | 16369216 | 9  | ENSOARG00000018887 | ANKFY1   | 24333248 | 24399136 | 11 | ENSOARG00000002070 | RGL1     | 62892208 | 63060293 | 12 |
| ENSOARG00000008448 | CAB39L  | 19236825 | 19286656 | 10 | ENSOARG00000026389 |          | 54096210 | 54271589 | 11 | ENSOARG00000010714 | USH2A    | 16999001 | 17981947 | 12 |
| ENSOARG00000009964 | TRPC4   | 24289442 | 24435384 | 10 | ENSOARG00000026390 |          | 54225864 | 54263405 | 11 | ENSOARG00000012654 | RAB3GAP2 | 21760318 | 21865369 | 12 |
| ENSOARG00000005519 | PIPOX   | 20029543 | 20041627 | 11 | ENSOARG00000002070 | RGL1     | 62892208 | 63060293 | 12 | ENSOARG00000015833 | TP73     | 47455866 | 47502821 | 12 |
| ENSOARG00000010799 | FBXL20  | 39315577 | 39409307 | 11 | ENSOARG00000002600 | C1orf21  | 63602428 | 63754041 | 12 | ENSOARG00000018748 | MORN1    | 48507947 | 48556384 | 12 |
| ENSOARG00000011855 |         | 45762020 | 45802167 | 11 | ENSOARG00000009688 |          | 42897047 | 43151892 | 12 | ENSOARG00000025437 |          | 23567301 | 23687517 | 12 |
| ENSOARG00000012131 | IKZF3   | 39697587 | 39784473 | 11 | ENSOARG00000010714 | USH2A    | 16999001 | 17981947 | 12 | ENSOARG00000025438 |          | 23570015 | 23657488 | 12 |
| ENSOARG00000015860 |         | 18748955 | 18836988 | 11 | ENSOARG00000012654 | RAB3GAP2 | 21760318 | 21865369 | 12 | ENSOARG00000010095 | PIGU     | 63488367 | 63582164 | 13 |
| ENSOARG00000016763 |         | 23686551 | 23829312 | 11 | ENSOARG00000012918 | TRAF3IP3 | 71661157 | 71680824 | 12 | ENSOARG00000011555 |          | 53619140 | 53734463 | 13 |
| ENSOARG00000026373 |         | 40159758 | 40312440 | 11 | ENSOARG00000018748 | MORN1    | 48507947 | 48556384 | 12 | ENSOARG00000018399 | TTI1     | 66454593 | 66484327 | 13 |
| ENSOARG00000013714 | CD34    | 73589869 | 73605431 | 12 | ENSOARG00000002785 | KIAA1217 | 24120977 | 24476577 | 13 | ENSOARG00000018960 | RALGAPB  | 66983273 | 67058489 | 13 |
| ENSOARG00000013891 |         | 73700588 | 73737242 | 12 | ENSOARG00000006091 |          | 73855033 | 73868280 | 13 | ENSOARG00000011682 |          | 54063550 | 54086186 | 14 |
| ENSOARG00000002139 | TTL9    | 60717466 | 60772689 | 13 | ENSOARG00000011461 | SEL1L2   | 6917382  | 7009037  | 13 | ENSOARG00000017939 | FTO      | 21524991 | 21953995 | 14 |
| ENSOARG00000002481 | XKR7    | 60797386 | 60822789 | 13 | ENSOARG00000015405 | CAMK1D   | 16052740 | 16366434 | 13 | ENSOARG00000005911 | INSC     | 36936849 | 37000817 | 15 |
| ENSOARG00000002820 | HCK     | 60874932 | 60921921 | 13 | ENSOARG00000017498 | PCK1     | 57900057 | 57905307 | 13 | ENSOARG00000008069 | TEAD1    | 39369981 | 39631064 | 15 |
| ENSOARG00000008288 | NECAB3  | 62540336 | 62561533 | 13 | ENSOARG00000018002 | SPO11    | 58100842 | 58115189 | 13 | ENSOARG00000011592 | GLYATL2  | 79280017 | 79288198 | 15 |
| ENSOARG00000008520 |         | 62551469 | 62552383 | 13 | ENSOARG00000018399 | TTI1     | 66454593 | 66484327 | 13 | ENSOARG00000015999 | IMMP1L   | 60430839 | 60496840 | 15 |
| ENSOARG00000015308 | CNBD2   | 64673075 | 64723487 | 13 | ENSOARG00000007080 |          | 2787215  | 3071357  | 14 | ENSOARG00000018423 | UBASH3B  | 32853387 | 33003019 | 15 |
| ENSOARG00000016562 | GNAS    | 56774752 | 56830745 | 13 | ENSOARG00000011682 |          | 54063550 | 54086186 | 14 | ENSOARG00000006371 | ADAMTS6  | 14045920 | 14324177 | 16 |
| ENSOARG00000018635 | DZANK1  | 37599912 | 37653541 | 13 | ENSOARG00000017939 | FTO      | 21524991 | 21953995 | 14 | ENSOARG00000010187 | WDR70    | 36614984 | 36892613 | 16 |
| ENSOARG00000018960 | RALGAPB | 66983273 | 67058489 | 13 | ENSOARG00000005819 | SOX6     | 35537489 | 36100232 | 15 | ENSOARG00000014702 | ADCY2    | 65280195 | 65721184 | 16 |
| ENSOARG00000026245 |         | 56795870 | 56916181 | 13 | ENSOARG00000005911 | INSC     | 36936849 | 37000817 | 15 | ENSOARG00000017566 |          | 71881383 | 72067452 | 17 |
| ENSOARG00000026248 |         | 64684046 | 64849522 | 13 | ENSOARG00000007202 | SPON1    | 38044689 | 38354554 | 15 | ENSOARG00000004861 | STXBP6   | 33919740 | 34146066 | 18 |
| ENSOARG00000008717 | XRCC1   | 50782808 | 50805182 | 14 | ENSOARG00000011592 | GLYATL2  | 79280017 | 79288198 | 15 | ENSOARG00000006557 | AKAP6    | 41629326 | 42119054 | 18 |

|                    |          |          |          |    |                    |          |          |          |    |                    |          |          |          |    |
|--------------------|----------|----------|----------|----|--------------------|----------|----------|----------|----|--------------------|----------|----------|----------|----|
| ENSOARG00000011355 | BICRA    | 53602524 | 53676728 | 14 | ENSOARG00000015999 | IMMP1L   | 60430839 | 60496840 | 15 | ENSOARG00000005786 |          | 48617258 | 48622991 | 19 |
| ENSOARG00000026909 |          | 23102469 | 23275357 | 14 | ENSOARG00000017917 | GRIK4    | 30791427 | 31136076 | 15 | ENSOARG00000007668 | GRM7     | 18544027 | 19149524 | 19 |
| ENSOARG00000026929 |          | 50701621 | 50891922 | 14 | ENSOARG00000006371 | ADAMTS6  | 14045920 | 14324177 | 16 | ENSOARG00000014531 | APPL1    | 43854675 | 43876438 | 19 |
| ENSOARG00000010872 | OR91I    | 78493970 | 78662782 | 15 | ENSOARG00000014702 | ADCY2    | 65280195 | 65721184 | 16 | ENSOARG00000016371 | ARPP21   | 9569024  | 9683317  | 19 |
| ENSOARG00000011446 |          | 79226138 | 79261515 | 15 | ENSOARG00000001443 | FSTL5    | 35976685 | 36901504 | 17 | ENSOARG00000003926 | CARMIL1  | 31188499 | 31494237 | 20 |
| ENSOARG00000013240 | ACER3    | 54380118 | 54544096 | 15 | ENSOARG00000004146 | FBXW7    | 4965419  | 5185723  | 17 | ENSOARG00000005603 | KHDRBS2  | 204311   | 1038981  | 20 |
| ENSOARG00000016714 | CCDC73   | 61520959 | 61671777 | 15 | ENSOARG00000018865 | KIAA1671 | 64862406 | 64986780 | 17 | ENSOARG00000005654 | PRIM2    | 2673361  | 2977511  | 20 |
| ENSOARG00000019097 | IFTAP    | 65231458 | 65301531 | 15 | ENSOARG00000019041 | GRK3     | 65098471 | 65205105 | 17 | ENSOARG00000010300 | SUPT3H   | 18310799 | 18706618 | 20 |
| ENSOARG00000008401 | PARP8    | 28331163 | 28521803 | 16 | ENSOARG00000001046 | CHRNA5   | 29994614 | 30020726 | 18 | ENSOARG00000005183 | DLG2     | 10779194 | 11743008 | 21 |
| ENSOARG00000001443 | FSTL5    | 35976685 | 36901504 | 17 | ENSOARG00000004861 | STXBP6   | 33919740 | 34146066 | 18 | ENSOARG00000007919 |          | 23117728 | 23624748 | 21 |
| ENSOARG00000011798 | INPP4B   | 15088639 | 15543935 | 17 | ENSOARG00000026453 |          | 48601602 | 48649268 | 18 | ENSOARG00000002088 | GRK5     | 38323057 | 38552331 | 22 |
| ENSOARG00000017120 | TMEM132B | 49885384 | 50186678 | 17 | ENSOARG00000007668 | GRM7     | 18544027 | 19149524 | 19 | ENSOARG00000005288 | KIAA1328 | 20111910 | 20525120 | 23 |
| ENSOARG00000009990 |          | 6726371  | 6750105  | 18 | ENSOARG00000009293 | CNTN3    | 27107120 | 27401680 | 19 | ENSOARG00000004697 | IQCE     | 40511246 | 40551800 | 24 |
| ENSOARG00000000458 | SFMBT1   | 47861509 | 47970530 | 19 | ENSOARG00000014531 | APPL1    | 43854675 | 43876438 | 19 | ENSOARG00000010673 |          | 28285509 | 28426315 | 24 |
| ENSOARG00000007465 | PLXNA1   | 60171949 | 60201198 | 19 | ENSOARG00000016371 | ARPP21   | 9569024  | 9683317  | 19 | ENSOARG00000011276 |          | 32699946 | 32762145 | 24 |
| ENSOARG00000008494 |          | 49530241 | 49701797 | 19 | ENSOARG00000003926 | CARMIL1  | 31188499 | 31494237 | 20 | ENSOARG00000011868 |          | 33115721 | 33286879 | 24 |
| ENSOARG00000009813 | SLC6A20  | 53424967 | 53471152 | 19 | ENSOARG00000005654 | PRIM2    | 2673361  | 2977511  | 20 | ENSOARG00000015554 |          | 19838976 | 20025969 | 24 |
| ENSOARG00000003613 | UBR2     | 16358563 | 16459598 | 20 | ENSOARG00000006418 | HMGCLL1  | 4979745  | 5104686  | 20 | ENSOARG00000015653 |          | 19931674 | 19979917 | 24 |
| ENSOARG00000006418 | HMGCLL1  | 4979745  | 5104686  | 20 | ENSOARG00000009595 | CDKAL1   | 35755504 | 36365789 | 20 | ENSOARG00000025891 |          | 33169760 | 33290472 | 24 |
| ENSOARG00000010300 | SUPT3H   | 18310799 | 18706618 | 20 | ENSOARG00000013835 | PHACTR1  | 42250178 | 42485827 | 20 | ENSOARG00000025902 |          | 40413481 | 40551726 | 24 |
| ENSOARG00000002815 | PACS1    | 43458201 | 43604405 | 21 | ENSOARG00000007919 |          | 23117728 | 23624748 | 21 | ENSOARG00000004227 |          | 15389097 | 15444034 | 25 |
| ENSOARG00000003549 | CNIH2    | 43635150 | 43640422 | 21 | ENSOARG00000006805 | CFAP43   | 23775242 | 23873559 | 22 | ENSOARG00000003976 |          | 36739622 | 36795389 | 26 |
| ENSOARG00000013080 | DOCK1    | 45364051 | 45875506 | 22 | ENSOARG00000005288 | KIAA1328 | 20111910 | 20525120 | 23 |                    |          |          |          |    |
| ENSOARG00000013216 | PCDH15   | 4372641  | 5337209  | 22 | ENSOARG00000005981 | PIGN     | 60716730 | 60819102 | 23 |                    |          |          |          |    |
| ENSOARG00000023496 |          | 45509628 | 45509742 | 22 | ENSOARG00000004697 | IQCE     | 40511246 | 40551800 | 24 |                    |          |          |          |    |
| ENSOARG00000004215 | NFATC1   | 748323   | 799990   | 23 | ENSOARG00000010673 |          | 28285509 | 28426315 | 24 |                    |          |          |          |    |
| ENSOARG00000006534 | DSG4     | 26023321 | 26063151 | 23 | ENSOARG00000011276 |          | 32699946 | 32762145 | 24 |                    |          |          |          |    |
| ENSOARG00000026144 |          | 657340   | 807916   | 23 | ENSOARG00000015554 | POLR3E   | 19838976 | 20025969 | 24 |                    |          |          |          |    |
| ENSOARG00000018283 | CYP3A24  | 36495420 | 36645659 | 24 | ENSOARG00000015653 | EEF2K    | 19931674 | 19979917 | 24 |                    |          |          |          |    |
| ENSOARG00000001975 |          | 33053238 | 33156974 | 26 | ENSOARG00000025902 |          | 40413481 | 40551726 | 24 |                    |          |          |          |    |
| ENSOARG00000004073 | PSD3     | 37045901 | 37438136 | 26 | ENSOARG00000004227 | CCDC6    | 15389097 | 15444034 | 25 |                    |          |          |          |    |
| ENSOARG00000006518 | GPM6A    | 6098874  | 6137326  | 26 | ENSOARG00000026405 | RPS6KA1  | 18960060 | 19006408 | 25 |                    |          |          |          |    |

Supplementary Table S2. Top 1% genes as candidates for selective signals using xp-EHH test on 26 sheep autosomes for: a) IR and IN breeds, b) IR and AF breeds, c) IN and AF breeds.

| Gene.stable.ID     | <b>a</b>  |            |           |          | <b>b</b>           |           |            |           | <b>c</b> |                    |           |            |           |          |
|--------------------|-----------|------------|-----------|----------|--------------------|-----------|------------|-----------|----------|--------------------|-----------|------------|-----------|----------|
|                    | Gene.name | Gene.start | Gene.end  | Chr.name | Gene.stable.ID     | Gene.name | Gene.start | Gene.end  | Chr.name | Gene.stable.ID     | Gene.name | Gene.start | Gene.end  | Chr.name |
| ENSOARG00000000049 |           | 217546133  | 217572906 | 1        | ENSOARG00000006594 | SLC4A10   | 146726620  | 146970354 | 2        | ENSOARG00000014127 | H LCS     | 267077034  | 267288456 | 1        |
| ENSOARG00000000446 | RAB3B     | 26126958   | 26230771  | 1        | ENSOARG00000009240 |           | 158267452  | 158268171 | 2        | ENSOARG00000010724 | ACTL8     | 247660078  | 247663496 | 2        |
| ENSOARG00000000458 | BTF3L4    | 26248871   | 26277392  | 1        | ENSOARG00000014059 | BNC2      | 84290339   | 84688738  | 2        | ENSOARG00000014195 | TMEFF2    | 193228532  | 193510876 | 2        |
| ENSOARG00000000541 | HPS3      | 237051700  | 237092922 | 1        | ENSOARG00000014183 | CAVIN2    | 193088535  | 193102584 | 2        | ENSOARG00000017452 | MTX2      | 132661611  | 132737409 | 2        |
| ENSOARG00000000558 | SPSB4     | 245928191  | 245928902 | 1        | ENSOARG00000014195 | TMEFF2    | 193228532  | 193510876 | 2        | ENSOARG00000020485 | RHBDD1    | 228158186  | 228272756 | 2        |
| ENSOARG00000000931 | BRWD1     | 257369779  | 257471383 | 1        | ENSOARG00000016675 | FSIP2     | 122472091  | 122615086 | 2        | ENSOARG00000021673 |           | 169649546  | 169649656 | 2        |
| ENSOARG00000001137 | AK5       | 53123782   | 53390133  | 1        | ENSOARG00000016691 |           | 123263616  | 123264542 | 2        | ENSOARG00000023420 |           | 169648692  | 169648802 | 2        |
| ENSOARG00000001311 | MORC3     | 266660290  | 266687301 | 1        | ENSOARG00000017321 | PRKRA     | 130564419  | 130579423 | 2        | ENSOARG00000023757 | U4        | 227996793  | 227996875 | 2        |
| ENSOARG00000001975 | CHAF1B    | 266698148  | 266724750 | 1        | ENSOARG00000017335 | OSBPL6    | 130606050  | 130693174 | 2        | ENSOARG00000024578 | U6        | 193361627  | 193361713 | 2        |
| ENSOARG00000002120 | CLDN14    | 266776355  | 266777907 | 1        | ENSOARG00000017378 |           | 130949077  | 131370341 | 2        | ENSOARG00000025024 |           | 169649900  | 169650014 | 2        |
| ENSOARG00000002157 | SIM2      | 267018135  | 267070595 | 1        | ENSOARG00000017403 | AGPS      | 131461739  | 131588288 | 2        | ENSOARG00000014716 | TRHDE     | 108235641  | 108685027 | 3        |
| ENSOARG00000002217 | H LCS     | 267077034  | 267288456 | 1        | ENSOARG00000019628 |           | 131444363  | 131446354 | 2        | ENSOARG00000015027 | SYT1      | 114906496  | 115404501 | 3        |
| ENSOARG00000002316 | ERG       | 268709089  | 268782327 | 1        | ENSOARG00000020485 | RHBDD1    | 228158186  | 228272756 | 2        | ENSOARG00000026012 |           | 108802884  | 108807540 | 3        |
| ENSOARG00000002371 | DPYD      | 73433343   | 74364967  | 1        | ENSOARG00000020677 |           | 231918490  | 231924826 | 2        | ENSOARG00000004800 | EEPDI     | 60964689   | 61086480  | 4        |
| ENSOARG00000002564 | UGT1A1    | 7058779    | 7192169   | 1        | ENSOARG00000020680 | PSMD1     | 231939813  | 232016729 | 2        | ENSOARG00000021411 |           | 81981748   | 81981878  | 4        |
| ENSOARG00000002820 | NGF       | 91785986   | 91843134  | 1        | ENSOARG00000020689 | HTR2B     | 231964788  | 231978154 | 2        | ENSOARG00000025260 |           | 107947753  | 107958927 | 4        |
| ENSOARG00000003100 | KALRN     | 186773857  | 187401074 | 1        | ENSOARG00000022968 |           | 130640657  | 130640789 | 2        | ENSOARG00000014867 | MSH3      | 78070508   | 78262288  | 5        |
| ENSOARG00000003295 | HIVEP3    | 15830095   | 15885701  | 1        | ENSOARG00000023757 | U4        | 227996793  | 227996875 | 2        | ENSOARG00000016099 | MEF2C     | 85606652   | 85706150  | 5        |
| ENSOARG00000003385 | ATP13A4   | 192150191  | 192276258 | 1        | ENSOARG00000024578 | U6        | 193361627  | 193361713 | 2        | ENSOARG00000024846 | MIR9-2    | 85551918   | 85552004  | 5        |
| ENSOARG00000003685 | TNIK      | 214087639  | 214487796 | 1        | ENSOARG00000014716 | TRHDE     | 108235641  | 108685027 | 3        | ENSOARG00000011735 | RUFY3     | 85751041   | 85822914  | 6        |
| ENSOARG00000003798 | S100A10   | 100863640  | 100867559 | 1        | ENSOARG00000015027 | SYT1      | 114906496  | 115404501 | 3        | ENSOARG00000011975 | MOB1B     | 85922030   | 85945597  | 6        |
| ENSOARG00000003806 | U6        | 129078476  | 129078582 | 1        | ENSOARG00000015171 | LIN7A     | 116695035  | 116841814 | 3        | ENSOARG00000012101 | DCK       | 85956079   | 85979964  | 6        |
| ENSOARG00000003986 |           | 26283852   | 26283956  | 1        | ENSOARG00000019622 | NELL2     | 141536582  | 141928837 | 3        | ENSOARG00000012378 | SLC4A4    | 86143053   | 86457688  | 6        |
| ENSOARG00000004112 | U6        | 74164892   | 74164995  | 1        | ENSOARG00000020137 | COMMD1    | 45943376   | 46116851  | 3        | ENSOARG00000000723 |           | 25137864   | 25138799  | 7        |
| ENSOARG00000004131 |           | 214113907  | 214113981 | 1        | ENSOARG00000004361 | ANLN      | 60803769   | 60856028  | 4        | ENSOARG00000002333 | TMEM63C   | 85357829   | 85416748  | 7        |
| ENSOARG00000004162 |           | 245911769  | 245917368 | 1        | ENSOARG00000007333 |           | 20466277   | 20468265  | 4        | ENSOARG00000002351 | NGB       | 85426613   | 85430447  | 7        |
| ENSOARG00000004334 |           | 266854180  | 266866713 | 1        | ENSOARG00000018446 | PTPRZ1    | 86318331   | 86517588  | 4        | ENSOARG00000002382 | POMT2     | 85438073   | 85471886  | 7        |
| ENSOARG00000004595 | SCN2A     | 143024729  | 143165286 | 2        | ENSOARG00000025221 |           | 20439819   | 20599507  | 4        | ENSOARG00000019856 |           | 25147983   | 25157854  | 7        |

|                    |         |           |           |   |                     |          |           |           |   |                     |         |          |          |    |
|--------------------|---------|-----------|-----------|---|---------------------|----------|-----------|-----------|---|---------------------|---------|----------|----------|----|
| ENSOARG00000004656 | TANC1   | 149352369 | 149535503 | 2 | ENSOARG000000025260 |          | 107947753 | 107958927 | 4 | ENSOARG000000019861 |         | 25167333 | 25168919 | 7  |
| ENSOARG00000004737 | EPC2    | 159603473 | 159677031 | 2 | ENSOARG000000010861 | TACR3    | 21484074  | 21564709  | 6 | ENSOARG000000021037 | SQOR    | 61798658 | 61834331 | 7  |
| ENSOARG00000004739 |         | 165154368 | 165495812 | 2 | ENSOARG000000012378 | SLC4A4   | 86143053  | 86457688  | 6 | ENSOARG000000021039 | BLOC1S6 | 61879421 | 61912418 | 7  |
| ENSOARG00000004752 | GFRA2   | 43555323  | 43658786  | 2 | ENSOARG000000016735 |          | 116816991 | 116817494 | 6 | ENSOARG000000021040 | SLC30A4 | 61937980 | 61964478 | 7  |
| ENSOARG00000004773 | TBC1D2  | 49199068  | 49241910  | 2 | ENSOARG000000016756 |          | 116844195 | 116845890 | 6 | ENSOARG000000021078 | GCH1    | 64275291 | 64331048 | 7  |
| ENSOARG00000004895 |         | 201095999 | 201136885 | 2 | ENSOARG000000026634 |          | 116805686 | 116807320 | 6 | ENSOARG000000026714 |         | 61937799 | 62039205 | 7  |
| ENSOARG00000004931 | PARD3B  | 205957943 | 206670334 | 2 | ENSOARG000000026635 |          | 116826888 | 116831975 | 6 | ENSOARG000000004872 | MPC1    | 87995562 | 87996759 | 8  |
| ENSOARG00000004948 | CAB39   | 231654998 | 231705560 | 2 | ENSOARG000000026636 |          | 116830864 | 116831975 | 6 | ENSOARG000000004895 | RPS6KA2 | 88034242 | 88188079 | 8  |
| ENSOARG00000004955 | ITM2C   | 231740173 | 231752466 | 2 | ENSOARG000000003122 | SPATA7   | 96996666  | 97038856  | 7 | ENSOARG000000012275 |         | 45307555 | 45359566 | 8  |
| ENSOARG00000005112 | SPATA3  | 231875615 | 231882882 | 2 | ENSOARG000000003163 | PTPN21   | 97057628  | 97126110  | 7 | ENSOARG000000027012 |         | 33968090 | 33980976 | 8  |
| ENSOARG00000005149 |         | 231918490 | 231924826 | 2 | ENSOARG000000003198 |          | 97148925  | 97186147  | 7 | ENSOARG000000027023 |         | 45307555 | 45506270 | 8  |
| ENSOARG00000005226 | PSMD1   | 231939813 | 232016729 | 2 | ENSOARG000000003285 | EML5     | 97190353  | 97312451  | 7 | ENSOARG000000027024 |         | 45402145 | 45418001 | 8  |
| ENSOARG00000005392 | U6      | 201028585 | 201028685 | 2 | ENSOARG000000021037 | SQOR     | 61798658  | 61834331  | 7 | ENSOARG000000027048 |         | 88033168 | 88034308 | 8  |
| ENSOARG00000005519 |         | 15532406  | 15580456  | 2 | ENSOARG000000021039 | BLOC1S6  | 61879421  | 61912418  | 7 | ENSOARG000000008657 | ZNF572  | 28044608 | 28046904 | 9  |
| ENSOARG00000005659 |         | 61818671  | 61896589  | 3 | ENSOARG000000021040 | SLC30A4  | 61937980  | 61964478  | 7 | ENSOARG000000008715 | MTSS1   | 28261745 | 28421317 | 9  |
| ENSOARG00000005689 | RANBP2  | 61917327  | 61963772  | 3 | ENSOARG000000021043 | SPATA5L1 | 62019680  | 62037987  | 7 | ENSOARG000000008825 | NDUFB9  | 28424418 | 28431883 | 9  |
| ENSOARG00000006006 | NOTO    | 95162096  | 95169384  | 3 | ENSOARG000000021067 | DDHD1    | 62633121  | 62701157  | 7 | ENSOARG000000008916 | TATDN1  | 28431947 | 28462592 | 9  |
| ENSOARG00000006163 | SMYD5   | 95171419  | 95181929  | 3 | ENSOARG000000023637 |          | 97026422  | 97026507  | 7 | ENSOARG000000009072 | RNF139  | 28463518 | 28485500 | 9  |
| ENSOARG00000006550 | PRADC1  | 95184038  | 95187679  | 3 | ENSOARG000000026714 |          | 61937799  | 62039205  | 7 | ENSOARG000000011105 |         | 31854222 | 31870373 | 9  |
| ENSOARG00000006564 | CCT7    | 95188823  | 95204670  | 3 | ENSOARG000000015035 | PDE7B    | 61071786  | 61228713  | 8 | ENSOARG000000014234 |         | 35135645 | 35277560 | 9  |
| ENSOARG00000006579 | ATP2B1  | 125851175 | 125982479 | 3 | ENSOARG000000005919 | NDUFAF6  | 81883016  | 81926044  | 9 | ENSOARG000000015243 | BPNT2   | 36711270 | 36729969 | 9  |
| ENSOARG00000006783 | KIF3C   | 33109792  | 33144386  | 3 | ENSOARG000000006180 | CCNE2    | 82068020  | 82079302  | 9 | ENSOARG000000016046 | RAB2A   | 39008886 | 39065425 | 9  |
| ENSOARG00000006793 |         | 137514279 | 137544861 | 3 | ENSOARG000000006512 | INTS8    | 82077576  | 82125587  | 9 | ENSOARG000000021727 | U6      | 27276187 | 27276292 | 9  |
| ENSOARG00000006876 | NELL2   | 141536582 | 141928837 | 3 | ENSOARG000000006836 | DPY19L4  | 82149729  | 82199476  | 9 | ENSOARG000000022168 |         | 36737787 | 36737865 | 9  |
| ENSOARG00000007087 | IAPP    | 193566307 | 193571714 | 3 | ENSOARG000000008715 | MTSS1    | 28261745  | 28421317  | 9 | ENSOARG000000026514 |         | 27103578 | 27106919 | 9  |
| ENSOARG00000007177 | SLCO1A2 | 193610779 | 193663029 | 3 | ENSOARG000000008825 | NDUFB9   | 28424418  | 28431883  | 9 | ENSOARG000000002377 | UGGT2   | 72496105 | 72638712 | 10 |
| ENSOARG00000007206 |         | 193676598 | 193750422 | 3 | ENSOARG000000008916 | TATDN1   | 28431947  | 28462592  | 9 | ENSOARG000000012462 |         | 32430686 | 32431560 | 10 |
| ENSOARG00000007299 | U6      | 193729019 | 193729125 | 3 | ENSOARG000000009072 | RNF139   | 28463518  | 28485500  | 9 | ENSOARG000000015029 |         | 42906101 | 43141913 | 10 |
| ENSOARG00000007429 | BBS9    | 63241800  | 63694790  | 4 | ENSOARG000000011105 |          | 31854222  | 31870373  | 9 | ENSOARG000000015071 |         | 43075598 | 43181328 | 10 |
| ENSOARG00000007585 | SLC35B4 | 97934780  | 97969641  | 4 | ENSOARG000000011206 | SPIDR    | 31974008  | 32251760  | 9 | ENSOARG000000017100 |         | 39646385 | 39646768 | 10 |
| ENSOARG00000007971 |         | 81543240  | 81854539  | 4 | ENSOARG000000014234 |          | 35135645  | 35277560  | 9 | ENSOARG000000017107 |         | 40068359 | 40068595 | 10 |
| ENSOARG00000008018 |         | 54490731  | 54690430  | 4 | ENSOARG000000014406 |          | 35794086  | 35795583  | 9 | ENSOARG000000010714 | USH2A   | 16999001 | 17981947 | 12 |

|                    |         |          |          |    |                    |          |          |          |    |                    |          |          |          |    |
|--------------------|---------|----------|----------|----|--------------------|----------|----------|----------|----|--------------------|----------|----------|----------|----|
| ENSOARG0000008076  | OR2M4   | 39387987 | 39552662 | 5  | ENSOARG00000015243 | BPNT2    | 36711270 | 36729969 | 9  | ENSOARG00000000049 |          | 19780214 | 20142442 | 13 |
| ENSOARG00000009451 | S1PR2   | 12433629 | 12435269 | 5  | ENSOARG00000015579 | LRP12    | 72670390 | 72737660 | 9  | ENSOARG00000017847 |          | 19659509 | 19713910 | 13 |
| ENSOARG00000009615 | MRPL4   | 12455973 | 12464459 | 5  | ENSOARG00000021727 | U6       | 27276187 | 27276292 | 9  | ENSOARG00000015418 |          | 44272723 | 44336115 | 15 |
| ENSOARG00000009618 | ICAM1   | 12500037 | 12509283 | 5  | ENSOARG00000022168 |          | 36737787 | 36737865 | 9  | ENSOARG00000015520 |          | 44463621 | 44464961 | 15 |
| ENSOARG00000009910 | MEF2C   | 85606652 | 85706150 | 5  | ENSOARG00000022430 | SNORA14B | 81895388 | 81895522 | 9  | ENSOARG00000015570 | OVCH2    | 44494449 | 44517443 | 15 |
| ENSOARG00000010632 | PFDN1   | 48825562 | 48896702 | 5  | ENSOARG00000026514 |          | 27103578 | 27106919 | 9  | ENSOARG00000015682 | CYB5R2   | 44541659 | 44549244 | 15 |
| ENSOARG00000010642 | U6      | 12448037 | 12448140 | 5  | ENSOARG00000002377 | UGGT2    | 72496105 | 72638712 | 10 | ENSOARG00000015882 | PPFIBP2  | 44557277 | 44676789 | 15 |
| ENSOARG00000010729 |         | 12439622 | 12439686 | 5  | ENSOARG00000006560 | PCDH17   | 5437832  | 5545654  | 10 | ENSOARG00000016441 |          | 29897938 | 29900669 | 15 |
| ENSOARG00000010799 |         | 16405363 | 16601603 | 5  | ENSOARG00000015029 |          | 42906101 | 43141913 | 10 | ENSOARG00000017190 |          | 44365815 | 44366747 | 15 |
| ENSOARG00000011100 | KCNIP4  | 40156628 | 40399467 | 6  | ENSOARG00000015071 |          | 43075598 | 43181328 | 10 | ENSOARG00000017200 |          | 44447648 | 44448583 | 15 |
| ENSOARG00000011404 | TET2    | 20055989 | 20147275 | 6  | ENSOARG00000015136 | KLHL1    | 44398314 | 44721829 | 10 | ENSOARG00000024850 | U6       | 44524030 | 44524133 | 15 |
| ENSOARG00000011462 | GPR65   | 96636242 | 96637267 | 7  | ENSOARG00000017100 |          | 39646385 | 39646768 | 10 | ENSOARG00000004468 | THOC5    | 68236030 | 68263906 | 17 |
| ENSOARG00000011506 |         | 25055731 | 25112579 | 7  | ENSOARG00000001311 | NDEL1    | 27586115 | 27616932 | 11 | ENSOARG00000004838 | NIPSNAP1 | 68267050 | 68281030 | 17 |
| ENSOARG00000011697 |         | 25087233 | 25088353 | 7  | ENSOARG00000001617 | MYH10    | 27625138 | 27747562 | 11 | ENSOARG00000004984 | NF2      | 68293690 | 68350562 | 17 |
| ENSOARG00000011712 |         | 48514282 | 48670343 | 7  | ENSOARG00000001933 | CCDC42   | 27821246 | 27834755 | 11 | ENSOARG00000005225 |          | 68313915 | 68314802 | 17 |
| ENSOARG00000011809 | SMOC1   | 78597451 | 78673983 | 7  | ENSOARG00000004334 |          | 27553456 | 27553671 | 11 | ENSOARG00000018082 | SART3    | 64042329 | 64081333 | 17 |
| ENSOARG00000011826 | SLC8A3  | 78697982 | 78837399 | 7  | ENSOARG00000009542 | DCAKD    | 44146007 | 44170968 | 11 | ENSOARG00000018146 | FICD     | 64084833 | 64087190 | 17 |
| ENSOARG00000012272 | U6      | 78600847 | 78600956 | 7  | ENSOARG00000009593 |          | 44173169 | 44203948 | 11 | ENSOARG00000004861 | STXBP6   | 33919740 | 34146066 | 18 |
| ENSOARG00000012935 | MAP3K4  | 83369733 | 83440796 | 8  | ENSOARG00000023893 |          | 27736355 | 27736449 | 11 | ENSOARG00000005909 | AP4S1    | 40603299 | 40621837 | 18 |
| ENSOARG00000013080 | AGPAT4  | 83449093 | 83583173 | 8  | ENSOARG00000010714 | USH2A    | 16999001 | 17981947 | 12 | ENSOARG00000006027 | HECTD1   | 40626204 | 40697245 | 18 |
| ENSOARG00000013382 | RPS6KA2 | 88034242 | 88188079 | 8  | ENSOARG00000011227 |          | 44885279 | 45057801 | 12 | ENSOARG00000008679 |          | 68343351 | 68355744 | 18 |
| ENSOARG00000013914 | HS3ST5  | 23301492 | 23469323 | 8  | ENSOARG00000012422 | ESPN     | 45017490 | 45050484 | 12 | ENSOARG00000008742 |          | 68378108 | 68383612 | 18 |
| ENSOARG00000013952 | LIN28B  | 32059283 | 32174641 | 8  | ENSOARG00000012956 | MARK1    | 22148091 | 22285882 | 12 | ENSOARG00000024702 |          | 34383351 | 34383431 | 18 |
| ENSOARG00000013992 |         | 33968090 | 33980976 | 8  | ENSOARG00000002481 | XKR7     | 60797386 | 60822789 | 13 | ENSOARG00000026481 |          | 68373351 | 68376670 | 18 |
| ENSOARG00000014030 |         | 88033168 | 88034308 | 8  | ENSOARG00000002564 |          | 60835911 | 60855548 | 13 | ENSOARG00000008743 | CNTN4    | 23126508 | 23921247 | 19 |
| ENSOARG00000014072 | CPQ     | 79583307 | 80022406 | 9  | ENSOARG00000017418 |          | 57854973 | 57864452 | 13 | ENSOARG00000011479 | CRTAC1   | 18239819 | 18367698 | 22 |
| ENSOARG00000014127 | NKAIN3  | 40545562 | 40801846 | 9  | ENSOARG00000017498 | PCK1     | 57900057 | 57905307 | 13 | ENSOARG00000021318 |          | 18433127 | 18433187 | 22 |
| ENSOARG00000014488 |         | 41066742 | 41066915 | 9  | ENSOARG00000017818 | CTCFL    | 57946183 | 57970701 | 13 | ENSOARG00000000089 | GTF3C1   | 25010620 | 25089541 | 24 |
| ENSOARG00000015308 | NDEL1   | 27586115 | 27616932 | 11 | ENSOARG00000017959 | RAE1     | 58073348 | 58092870 | 13 | ENSOARG00000000347 | TRRAP    | 37140796 | 37227404 | 24 |
| ENSOARG00000015375 | NEK8    | 19779100 | 19786873 | 11 | ENSOARG00000018002 | SPO11    | 58100842 | 58115189 | 13 | ENSOARG00000000439 | KIAA0556 | 25089816 | 25321497 | 24 |
| ENSOARG00000015424 | TRAF4   | 19788399 | 19794104 | 11 | ENSOARG00000018039 | BMP7     | 58173131 | 58255337 | 13 | ENSOARG00000000845 |          | 25333567 | 25379060 | 24 |
| ENSOARG00000015562 | FAM222B | 19799477 | 19808342 | 11 | ENSOARG00000009501 |          | 8152352  | 8162610  | 14 | ENSOARG00000001158 | LAT      | 25866851 | 25870792 | 24 |
| ENSOARG00000015602 |         | 27553456 | 27553671 | 11 | ENSOARG00000000818 | TRIM68   | 48828042 | 48836776 | 15 | ENSOARG00000001555 | NFATC2IP | 25890362 | 25899904 | 24 |



|                    |           |          |          |    |                    |          |          |          |    |                    |        |          |          |    |
|--------------------|-----------|----------|----------|----|--------------------|----------|----------|----------|----|--------------------|--------|----------|----------|----|
| ENSOARG00000015656 | PIPOX     | 20029543 | 20041627 | 11 | ENSOARG00000006555 | OR51D1   | 48804671 | 48805642 | 15 | ENSOARG00000001710 | CD19   | 25905178 | 25915071 | 24 |
| ENSOARG00000015673 | MYO18A    | 20058835 | 20151305 | 11 | ENSOARG00000001443 | FSTL5    | 35976685 | 36901504 | 17 | ENSOARG00000001825 | RABEP2 | 25921006 | 25932126 | 24 |
| ENSOARG00000015680 | CRYBA1    | 20215842 | 20222612 | 11 | ENSOARG00000004861 | STXBP6   | 33919740 | 34146066 | 18 | ENSOARG00000002132 | ATP2A1 | 25931953 | 25950361 | 24 |
| ENSOARG00000015828 | TAOK1     | 20329392 | 20426865 | 11 | ENSOARG00000004978 | TRAF3    | 66251073 | 66299780 | 18 | ENSOARG00000002503 | ATXN2L | 25982899 | 25992849 | 24 |
| ENSOARG00000015942 | FBXL20    | 39315577 | 39409307 | 11 | ENSOARG00000006557 | AKAP6    | 41629326 | 42119054 | 18 | ENSOARG00000002826 |        | 25997816 | 25998752 | 24 |
| ENSOARG00000016099 | BRIP1     | 10781894 | 10963192 | 11 | ENSOARG00000010549 | LRIG1    | 34975963 | 35089024 | 19 | ENSOARG00000002892 |        | 26017951 | 26038745 | 24 |
| ENSOARG00000016110 |           | 38822779 | 38822875 | 11 | ENSOARG00000010656 | SLC25A26 | 35091509 | 35232652 | 19 | ENSOARG00000002994 |        | 26052066 | 26063735 | 24 |
| ENSOARG00000016442 | 5S_rRNA   | 19809497 | 19809594 | 11 | ENSOARG00000003301 | EXOC2    | 50814198 | 50938070 | 20 | ENSOARG00000003124 |        | 26065424 | 26069206 | 24 |
| ENSOARG00000016708 | SNORA72   | 20171313 | 20171444 | 11 | ENSOARG00000016571 |          | 44982565 | 45218014 | 20 | ENSOARG00000003180 | IL27   | 26070181 | 26075232 | 24 |
| ENSOARG00000017054 |           | 20164604 | 20214384 | 11 | ENSOARG00000018445 | F13A1    | 47734507 | 47872375 | 20 | ENSOARG00000003465 | RADIL  | 39012202 | 39064415 | 24 |
| ENSOARG00000017418 |           | 4582491  | 4601032  | 12 | ENSOARG00000026890 |          | 50789331 | 50794993 | 20 | ENSOARG00000003582 | AP5Z1  | 39064376 | 39072830 | 24 |
| ENSOARG00000017471 |           | 19780214 | 20142442 | 13 | ENSOARG00000010436 | MMS19    | 17890450 | 17925365 | 22 | ENSOARG00000003652 | FOXK1  | 39087521 | 39135075 | 24 |
| ENSOARG00000017549 |           | 60835911 | 60855548 | 13 | ENSOARG00000021318 |          | 18433127 | 18433187 | 22 | ENSOARG00000003718 | MAPK3  | 26187757 | 26198895 | 24 |
| ENSOARG00000017573 | HCK       | 60874932 | 60921921 | 13 | ENSOARG00000000089 | GTF3C1   | 25010620 | 25089541 | 24 | ENSOARG00000003771 | GDPD3  | 26195548 | 26200790 | 24 |
| ENSOARG00000017701 | C20orf194 | 51137982 | 51282854 | 13 | ENSOARG00000000110 | SMURF1   | 37110700 | 37133651 | 24 | ENSOARG00000003856 |        | 39315644 | 39568156 | 24 |
| ENSOARG00000018039 | SLC4A11   | 51295540 | 51304552 | 13 | ENSOARG00000000347 | TRRAP    | 37140796 | 37227404 | 24 | ENSOARG00000003882 | YPEL3  | 26202421 | 26205022 | 24 |
| ENSOARG00000018082 | ITPA      | 51306908 | 51319485 | 13 | ENSOARG00000000439 | KIAA0556 | 25089816 | 25321497 | 24 | ENSOARG00000004040 | TBX6   | 26206479 | 26210145 | 24 |
| ENSOARG00000018146 | DDRKG1    | 51322212 | 51335874 | 13 | ENSOARG00000000602 | NPTX2    | 37374225 | 37384919 | 24 | ENSOARG00000004100 | PPP4C  | 26211200 | 26218665 | 24 |
| ENSOARG00000018381 | OXT       | 51437893 | 51438654 | 13 | ENSOARG00000000845 |          | 25333567 | 25379060 | 24 | ENSOARG00000004143 |        | 26218820 | 26227471 | 24 |
| ENSOARG00000018463 |           | 51453752 | 51455892 | 13 | ENSOARG00000001158 | LAT      | 25866851 | 25870792 | 24 | ENSOARG00000004277 |        | 39599497 | 39872553 | 24 |
| ENSOARG00000018718 |           | 51127715 | 51128704 | 13 | ENSOARG00000001555 | NFATC2IP | 25890362 | 25899904 | 24 | ENSOARG00000004356 | CARD11 | 40316370 | 40355402 | 24 |
| ENSOARG00000019217 | PTPRA     | 51465912 | 51530581 | 13 | ENSOARG00000001710 | CD19     | 25905178 | 25915071 | 24 | ENSOARG00000004437 | GNA12  | 40358096 | 40462023 | 24 |
| ENSOARG00000019251 | VPS16     | 51640703 | 51674356 | 13 | ENSOARG00000001825 | RABEP2   | 25921006 | 25932126 | 24 | ENSOARG00000004504 | AMZ1   | 40472597 | 40484725 | 24 |
| ENSOARG00000019622 | CNBD2     | 64673075 | 64723487 | 13 | ENSOARG00000002132 | ATP2A1   | 25931953 | 25950361 | 24 | ENSOARG00000004594 |        | 40504639 | 40511497 | 24 |
| ENSOARG00000019850 |           | 57854973 | 57864452 | 13 | ENSOARG00000002503 | ATXN2L   | 25982899 | 25992849 | 24 | ENSOARG00000004697 | IQCE   | 40511246 | 40551800 | 24 |
| ENSOARG00000019853 | BMP7      | 58173131 | 58255337 | 13 | ENSOARG00000002826 |          | 25997816 | 25998752 | 24 | ENSOARG00000004887 | TTYH3  | 40571285 | 40593681 | 24 |
| ENSOARG00000020138 |           | 48604903 | 48851165 | 13 | ENSOARG00000002892 |          | 26017951 | 26038745 | 24 | ENSOARG00000004992 | LFNG   | 40603433 | 40611924 | 24 |
| ENSOARG00000020197 |           | 48820759 | 48877389 | 13 | ENSOARG00000002994 |          | 26052066 | 26063735 | 24 | ENSOARG00000005030 | KCTD13 | 26354516 | 26367538 | 24 |
| ENSOARG00000020214 |           | 64684046 | 64849522 | 13 | ENSOARG00000003124 |          | 26065424 | 26069206 | 24 | ENSOARG00000005092 | ASPHD1 | 26368344 | 26371923 | 24 |
| ENSOARG00000020369 |           | 59732746 | 59746310 | 14 | ENSOARG00000003180 | IL27     | 26070181 | 26075232 | 24 | ENSOARG00000005130 | SEZ6L2 | 26373702 | 26393367 | 24 |
| ENSOARG00000020378 | NCR1      | 59754651 | 59759266 | 14 | ENSOARG00000003465 | RADIL    | 39012202 | 39064415 | 24 | ENSOARG00000005487 |        | 26443971 | 26493101 | 24 |
| ENSOARG00000020390 |           | 59783522 | 59939846 | 14 | ENSOARG00000003582 | AP5Z1    | 39064376 | 39072830 | 24 | ENSOARG00000005716 | QPRT   | 26506332 | 26507999 | 24 |
| ENSOARG00000020420 |           | 59876096 | 59883028 | 14 | ENSOARG00000003652 | FOXK1    | 39087521 | 39135075 | 24 | ENSOARG00000005724 |        | 26526804 | 26528279 | 24 |

|                    |          |          |          |    |                    |          |          |          |    |                    |          |          |          |    |
|--------------------|----------|----------|----------|----|--------------------|----------|----------|----------|----|--------------------|----------|----------|----------|----|
| ENSOARG00000020433 |          | 59902860 | 59913735 | 14 | ENSOARG00000003718 | MAPK3    | 26187757 | 26198895 | 24 | ENSOARG00000005865 | CD2BP2   | 26558468 | 26560111 | 24 |
| ENSOARG00000020671 |          | 48886844 | 48889584 | 15 | ENSOARG00000003771 | GDPD3    | 26195548 | 26200790 | 24 | ENSOARG00000005979 | TBC1D10B | 26563335 | 26573288 | 24 |
| ENSOARG00000020673 |          | 48886985 | 48887446 | 15 | ENSOARG00000003856 |          | 39315644 | 39568156 | 24 | ENSOARG00000006071 | MYLPF    | 26577862 | 26579570 | 24 |
| ENSOARG00000020675 |          | 48921683 | 48922636 | 15 | ENSOARG00000003882 | YPEL3    | 26202421 | 26205022 | 24 | ENSOARG00000006135 | SEPTIN1  | 26580136 | 26583513 | 24 |
| ENSOARG00000020677 | C1QTNF5  | 29389458 | 29390834 | 15 | ENSOARG00000004040 | TBX6     | 26206479 | 26210145 | 24 | ENSOARG00000006258 |          | 26603368 | 26610707 | 24 |
| ENSOARG00000020680 | MFRP     | 29390596 | 29396511 | 15 | ENSOARG00000004100 | PPP4C    | 26211200 | 26218665 | 24 | ENSOARG00000006284 | DCTPP1   | 26614394 | 26617494 | 24 |
| ENSOARG00000020761 | USP2     | 29405834 | 29421267 | 15 | ENSOARG00000004143 |          | 26218820 | 26227471 | 24 | ENSOARG00000006294 |          | 26629126 | 26630460 | 24 |
| ENSOARG00000020851 | RNF26    | 29385024 | 29386343 | 15 | ENSOARG00000004356 | CARD11   | 40316370 | 40355402 | 24 | ENSOARG00000006423 | ITGAL    | 26679858 | 26721693 | 24 |
| ENSOARG00000021077 | AK6      | 10361305 | 10375165 | 16 | ENSOARG00000004437 | GNA12    | 40358096 | 40462023 | 24 | ENSOARG00000006854 | PRR14    | 26793302 | 26798414 | 24 |
| ENSOARG00000021190 | CCDC125  | 10390597 | 10411746 | 16 | ENSOARG00000004504 | AMZ1     | 40472597 | 40484725 | 24 | ENSOARG00000006922 | FBRS     | 26801050 | 26811701 | 24 |
| ENSOARG00000021191 | ARL15    | 24832234 | 25070666 | 16 | ENSOARG00000004594 |          | 40504639 | 40511497 | 24 | ENSOARG00000007922 | BCL7C    | 26980759 | 26985417 | 24 |
| ENSOARG00000021335 | SLC1A3   | 37483723 | 37563198 | 16 | ENSOARG00000004697 | IQCE     | 40511246 | 40551800 | 24 | ENSOARG00000008040 |          | 26987973 | 26990899 | 24 |
| ENSOARG00000021510 | AGXT2    | 39050049 | 39092566 | 16 | ENSOARG00000004887 | TTYH3    | 40571285 | 40593681 | 24 | ENSOARG00000008120 | FBXL19   | 27052748 | 27071677 | 24 |
| ENSOARG00000021555 | DNAJC21  | 39118001 | 39143364 | 16 | ENSOARG00000004992 | LFNG     | 40603433 | 40611924 | 24 | ENSOARG00000008151 | ORA13    | 27073875 | 27081653 | 24 |
| ENSOARG00000021704 | 5S_rRNA  | 37411219 | 37411332 | 16 | ENSOARG00000005030 | KCTD13   | 26354516 | 26367538 | 24 | ENSOARG00000008207 |          | 27082568 | 27104615 | 24 |
| ENSOARG00000022105 |          | 4541467  | 4572685  | 17 | ENSOARG00000005092 | ASPHD1   | 26368344 | 26371923 | 24 | ENSOARG00000008255 | HSD3B7   | 27106043 | 27108526 | 24 |
| ENSOARG00000022151 | SART3    | 64042329 | 64081333 | 17 | ENSOARG00000005130 | SEZ6L2   | 26373702 | 26393367 | 24 | ENSOARG00000008744 | KAT8     | 27211624 | 27221382 | 24 |
| ENSOARG00000022911 | FICD     | 64084833 | 64087190 | 17 | ENSOARG00000005487 |          | 26443971 | 26493101 | 24 | ENSOARG00000008811 |          | 27222406 | 27226048 | 24 |
| ENSOARG00000023060 | BAZ1A    | 44016642 | 44094936 | 18 | ENSOARG00000005716 | QPRT     | 26506332 | 26507999 | 24 | ENSOARG00000008863 |          | 27229167 | 27231806 | 24 |
| ENSOARG00000023104 |          | 44166626 | 44194878 | 18 | ENSOARG00000005724 |          | 26526804 | 26528279 | 24 | ENSOARG00000008869 |          | 27259119 | 27265626 | 24 |
| ENSOARG00000023268 | FAM177A1 | 44252555 | 44262354 | 18 | ENSOARG00000005865 | CD2BP2   | 26558468 | 26560111 | 24 | ENSOARG00000008908 | PYCARD   | 27279014 | 27280168 | 24 |
| ENSOARG00000023496 | PPP2R3C  | 44263406 | 44291760 | 18 | ENSOARG00000005979 | TBC1D10B | 26563335 | 26573288 | 24 | ENSOARG00000008958 | TRIM72   | 27290363 | 27297934 | 24 |
| ENSOARG00000023679 | PSMA6    | 44447953 | 44471341 | 18 | ENSOARG00000006071 | MYLPF    | 26577862 | 26579570 | 24 | ENSOARG00000009000 | ITGAM    | 27341076 | 27384550 | 24 |
| ENSOARG00000024268 | PDE8A    | 21759426 | 21904086 | 18 | ENSOARG00000006135 | SEPTIN1  | 26580136 | 26583513 | 24 | ENSOARG00000009130 | ITGAX    | 27400568 | 27419288 | 24 |
| ENSOARG00000024270 |          | 44025256 | 44026309 | 18 | ENSOARG00000006258 |          | 26603368 | 26610707 | 24 | ENSOARG00000009250 |          | 27446741 | 27473467 | 24 |
| ENSOARG00000024949 | SFMBT1   | 47861509 | 47970530 | 19 | ENSOARG00000006284 | DCTPP1   | 26614394 | 26617494 | 24 | ENSOARG00000009432 | COX6A2   | 27474854 | 27475391 | 24 |
| ENSOARG00000025234 |          | 47978524 | 48028706 | 19 | ENSOARG00000006294 |          | 26629126 | 26630460 | 24 | ENSOARG00000009484 | ARMCS    | 27490512 | 27497969 | 24 |
| ENSOARG00000025294 | ERC2     | 44591299 | 45551630 | 19 | ENSOARG00000006423 | ITGAL    | 26679858 | 26721693 | 24 | ENSOARG00000009817 | SEPTIN14 | 27566765 | 27582185 | 24 |
| ENSOARG00000025626 | U5       | 45181051 | 45181168 | 19 | ENSOARG00000006854 | PRR14    | 26793302 | 26798414 | 24 | ENSOARG00000009864 |          | 27613500 | 27618310 | 24 |
| ENSOARG00000025645 | FKBP5    | 9692040  | 9766541  | 20 | ENSOARG00000006922 | FBRS     | 26801050 | 26811701 | 24 | ENSOARG00000010011 |          | 27708661 | 27717935 | 24 |
| ENSOARG00000025743 |          | 48062157 | 48322346 | 20 | ENSOARG00000007922 | BCL7C    | 26980759 | 26985417 | 24 | ENSOARG00000010109 |          | 27719967 | 27730172 | 24 |
| ENSOARG00000026237 |          | 37107927 | 37116861 | 21 | ENSOARG00000008040 |          | 26987973 | 26990899 | 24 | ENSOARG00000010150 | PHKG1    | 27731323 | 27736862 | 24 |
| ENSOARG00000026238 | PLCE1    | 14970716 | 15337763 | 22 | ENSOARG00000008120 | FBXL19   | 27052748 | 27071677 | 24 | ENSOARG00000010228 |          | 27743597 | 27746528 | 24 |

|                    |         |          |          |    |                    |          |          |          |    |                    |          |          |          |    |
|--------------------|---------|----------|----------|----|--------------------|----------|----------|----------|----|--------------------|----------|----------|----------|----|
| ENSOARG00000026248 | DOCK1   | 45364051 | 45875506 | 22 | ENSOARG00000008151 | ORAI3    | 27073875 | 27081653 | 24 | ENSOARG00000010380 | CRCP     | 27932583 | 27968175 | 24 |
| ENSOARG00000026357 | INSYN2A | 45535724 | 45574150 | 22 | ENSOARG00000008207 |          | 27082568 | 27104615 | 24 | ENSOARG00000010453 | TPST1    | 28032989 | 28099175 | 24 |
| ENSOARG00000026451 |         | 45509628 | 45509742 | 22 | ENSOARG00000008255 | HSD3B7   | 27106043 | 27108526 | 24 | ENSOARG00000010484 |          | 16387268 | 16391608 | 24 |
| ENSOARG00000027012 | USP31   | 20777411 | 20855050 | 24 | ENSOARG00000008744 | KAT8     | 27211624 | 27221382 | 24 | ENSOARG00000010507 | RABGEF1  | 28157577 | 28180855 | 24 |
| ENSOARG00000027048 |         | 33053238 | 33156974 | 26 | ENSOARG00000008811 |          | 27222406 | 27226048 | 24 | ENSOARG00000010552 | ARL6IP1  | 16399732 | 16404458 | 24 |
|                    |         |          |          |    | ENSOARG00000008863 |          | 27229167 | 27231806 | 24 | ENSOARG00000010673 |          | 28285509 | 28426315 | 24 |
|                    |         |          |          |    | ENSOARG00000008869 |          | 27259119 | 27265626 | 24 | ENSOARG00000010710 | CALN1    | 28550611 | 29016799 | 24 |
|                    |         |          |          |    | ENSOARG00000008908 | PYCARD   | 27279014 | 27280168 | 24 | ENSOARG00000010716 |          | 16421625 | 16421954 | 24 |
|                    |         |          |          |    | ENSOARG00000008958 | TRIM72   | 27290363 | 27297934 | 24 | ENSOARG00000010731 |          | 29062550 | 29089745 | 24 |
|                    |         |          |          |    | ENSOARG00000009000 | ITGAM    | 27341076 | 27384550 | 24 | ENSOARG00000010753 |          | 23768794 | 23769432 | 24 |
|                    |         |          |          |    | ENSOARG00000009130 | ITGAX    | 27400568 | 27419288 | 24 | ENSOARG00000010767 |          | 26561711 | 26562259 | 24 |
|                    |         |          |          |    | ENSOARG00000009250 |          | 27446741 | 27473467 | 24 | ENSOARG00000010866 |          | 17182255 | 17182446 | 24 |
|                    |         |          |          |    | ENSOARG00000009432 | COX6A2   | 27474854 | 27475391 | 24 | ENSOARG00000010928 | SMG1     | 16411396 | 16483879 | 24 |
|                    |         |          |          |    | ENSOARG00000009484 | ARMC5    | 27490512 | 27497969 | 24 | ENSOARG00000012249 | VPS35L   | 17113331 | 17243756 | 24 |
|                    |         |          |          |    | ENSOARG00000010011 |          | 27708661 | 27717935 | 24 | ENSOARG00000013593 |          | 34135113 | 34165507 | 24 |
|                    |         |          |          |    | ENSOARG00000010109 |          | 27719967 | 27730172 | 24 | ENSOARG00000013650 | MDH2     | 34164879 | 34177170 | 24 |
|                    |         |          |          |    | ENSOARG00000010150 | PHKG1    | 27731323 | 27736862 | 24 | ENSOARG00000013722 | SRRM3    | 34217112 | 34247460 | 24 |
|                    |         |          |          |    | ENSOARG00000010228 |          | 27743597 | 27746528 | 24 | ENSOARG00000013748 | HSPB1    | 34256246 | 34257717 | 24 |
|                    |         |          |          |    | ENSOARG00000010453 | TPST1    | 28032989 | 28099175 | 24 | ENSOARG00000013833 | SSC4D    | 34325067 | 34335720 | 24 |
|                    |         |          |          |    | ENSOARG00000010484 |          | 16387268 | 16391608 | 24 | ENSOARG00000014682 |          | 19098694 | 19358510 | 24 |
|                    |         |          |          |    | ENSOARG00000010507 | RABGEF1  | 28157577 | 28180855 | 24 | ENSOARG00000015168 |          | 35432755 | 35438155 | 24 |
|                    |         |          |          |    | ENSOARG00000010552 | ARL6IP1  | 16399732 | 16404458 | 24 | ENSOARG00000017677 | CACNG3   | 21924568 | 22022189 | 24 |
|                    |         |          |          |    | ENSOARG00000010673 |          | 28285509 | 28426315 | 24 | ENSOARG00000017950 | TNRC6A   | 22384968 | 22479794 | 24 |
|                    |         |          |          |    | ENSOARG00000010710 | CALN1    | 28550611 | 29016799 | 24 | ENSOARG00000018283 | CYP3A24  | 36495420 | 36645659 | 24 |
|                    |         |          |          |    | ENSOARG00000010732 | ITPRIPL2 | 16817916 | 16819445 | 24 | ENSOARG00000018306 | ARHGAP17 | 22575927 | 22630268 | 24 |
|                    |         |          |          |    | ENSOARG00000010743 |          | 23023376 | 23024338 | 24 | ENSOARG00000018442 | LCMT1    | 22670317 | 22755114 | 24 |
|                    |         |          |          |    | ENSOARG00000010753 |          | 23768794 | 23769432 | 24 | ENSOARG00000018457 |          | 36569069 | 36595967 | 24 |
|                    |         |          |          |    | ENSOARG00000010767 |          | 26561711 | 26562259 | 24 | ENSOARG00000018461 |          | 22672598 | 22676620 | 24 |
|                    |         |          |          |    | ENSOARG00000010866 |          | 17182255 | 17182446 | 24 | ENSOARG00000018497 | TMEM225B | 36704386 | 36711882 | 24 |
|                    |         |          |          |    | ENSOARG00000010928 | SMG1     | 16411396 | 16483879 | 24 | ENSOARG00000018512 |          | 36718853 | 36726417 | 24 |
|                    |         |          |          |    | ENSOARG00000012008 | GDE1     | 17049328 | 17074699 | 24 | ENSOARG00000018518 | ZNF655   | 36733005 | 36743576 | 24 |
|                    |         |          |          |    | ENSOARG00000012037 |          | 17063475 | 17064629 | 24 | ENSOARG00000018521 | ZNF789   | 36764572 | 36773601 | 24 |
|                    |         |          |          |    | ENSOARG00000012082 | CCP110   | 17081831 | 17098590 | 24 | ENSOARG00000018538 |          | 36782276 | 36797011 | 24 |

|                    |             |          |          |    |                    |             |          |          |    |
|--------------------|-------------|----------|----------|----|--------------------|-------------|----------|----------|----|
| ENSOARG00000012249 | VPS35L      | 17113331 | 17243756 | 24 | ENSOARG00000018676 |             | 36858253 | 36867852 | 24 |
| ENSOARG00000013722 | SRRM3       | 34217112 | 34247460 | 24 | ENSOARG00000018686 |             | 23284024 | 23287342 | 24 |
| ENSOARG00000013748 | HSPB1       | 34256246 | 34257717 | 24 | ENSOARG00000018696 | PDAP1       | 36877950 | 36883201 | 24 |
| ENSOARG00000014682 |             | 19098694 | 19358510 | 24 | ENSOARG00000018709 |             | 24665014 | 24665858 | 24 |
| ENSOARG00000015117 |             | 35409415 | 35412574 | 24 | ENSOARG00000018731 | ARPC1B      | 36885477 | 36891494 | 24 |
| ENSOARG00000015168 |             | 35432755 | 35438155 | 24 | ENSOARG00000018781 |             | 36903067 | 36926200 | 24 |
| ENSOARG00000017677 | CACNG3      | 21924568 | 22022189 | 24 | ENSOARG00000018824 | KPNA7       | 36986738 | 37026203 | 24 |
| ENSOARG00000017741 | RBBP6       | 22202339 | 22237519 | 24 | ENSOARG00000018832 | IL4R        | 24897923 | 24921149 | 24 |
| ENSOARG00000017950 | TNRC6A      | 22384968 | 22479794 | 24 | ENSOARG00000018894 | IL21R       | 24987772 | 25002160 | 24 |
| ENSOARG00000018283 | CYP3A24     | 36495420 | 36645659 | 24 | ENSOARG00000022049 |             | 23643906 | 23643986 | 24 |
| ENSOARG00000018306 | ARHGAP17    | 22575927 | 22630268 | 24 | ENSOARG00000022216 | SNORD14     | 30871659 | 30871748 | 24 |
| ENSOARG00000018442 | LCMT1       | 22670317 | 22755114 | 24 | ENSOARG00000022461 |             | 27711344 | 27711477 | 24 |
| ENSOARG00000018457 |             | 36569069 | 36595967 | 24 | ENSOARG00000022869 | Metazoa_SRP | 36737619 | 36737895 | 24 |
| ENSOARG00000018461 |             | 22672598 | 22676620 | 24 | ENSOARG00000023381 |             | 27715209 | 27715348 | 24 |
| ENSOARG00000018497 | TMEM225B    | 36704386 | 36711882 | 24 | ENSOARG00000023493 | U6          | 26483547 | 26483653 | 24 |
| ENSOARG00000018512 |             | 36718853 | 36726417 | 24 | ENSOARG00000024511 |             | 26985376 | 26985458 | 24 |
| ENSOARG00000018518 | ZNF655      | 36733005 | 36743576 | 24 | ENSOARG00000024633 | 5S_rRNA     | 23323009 | 23323126 | 24 |
| ENSOARG00000018521 | ZNF789      | 36764572 | 36773601 | 24 | ENSOARG00000025884 |             | 24661530 | 24663614 | 24 |
| ENSOARG00000018538 |             | 36782276 | 36797011 | 24 | ENSOARG00000025885 |             | 27237144 | 27238017 | 24 |
| ENSOARG00000018676 |             | 36858253 | 36867852 | 24 | ENSOARG00000025900 |             | 38964478 | 39079933 | 24 |
| ENSOARG00000018686 |             | 23284024 | 23287342 | 24 | ENSOARG00000025901 |             | 39157209 | 39160570 | 24 |
| ENSOARG00000018696 | PDAP1       | 36877950 | 36883201 | 24 | ENSOARG00000025902 |             | 40413481 | 40551726 | 24 |
| ENSOARG00000018709 |             | 24665014 | 24665858 | 24 | ENSOARG00000025903 |             | 40462329 | 40463477 | 24 |
| ENSOARG00000018731 | ARPC1B      | 36885477 | 36891494 | 24 | ENSOARG00000025906 |             | 40565957 | 40580901 | 24 |
| ENSOARG00000018781 |             | 36903067 | 36926200 | 24 | ENSOARG00000025907 |             | 40590851 | 40620365 | 24 |
| ENSOARG00000018797 | NSMCE1      | 24802986 | 24837628 | 24 | ENSOARG0000001975  |             | 33053238 | 33156974 | 26 |
| ENSOARG00000018824 | KPNA7       | 36986738 | 37026203 | 24 | ENSOARG0000002025  |             | 33169749 | 33171167 | 26 |
| ENSOARG00000018832 | IL4R        | 24897923 | 24921149 | 24 | ENSOARG0000002101  | ADAM2       | 33174931 | 33293614 | 26 |
| ENSOARG00000018894 | IL21R       | 24987772 | 25002160 | 24 | ENSOARG00000006518 | GPM6A       | 6098874  | 6137326  | 26 |
| ENSOARG00000022461 |             | 27711344 | 27711477 | 24 | ENSOARG00000014127 |             |          |          |    |
| ENSOARG00000022869 | Metazoa_SRP | 36737619 | 36737895 | 24 | ENSOARG00000010724 |             |          |          |    |
| ENSOARG00000023381 |             | 27715209 | 27715348 | 24 | ENSOARG00000014195 |             |          |          |    |

|                    |         |          |          |    |                    |
|--------------------|---------|----------|----------|----|--------------------|
| ENSOARG00000023493 | U6      | 26483547 | 26483653 | 24 | ENSOARG00000017452 |
| ENSOARG00000024511 |         | 26985376 | 26985458 | 24 | ENSOARG00000020485 |
| ENSOARG00000024633 | 5S_rRNA | 23323009 | 23323126 | 24 | ENSOARG00000021673 |
| ENSOARG00000025882 |         | 22192111 | 22201388 | 24 | ENSOARG00000023420 |
| ENSOARG00000025884 |         | 24661530 | 24663614 | 24 | ENSOARG00000023757 |
| ENSOARG00000025885 |         | 27237144 | 27238017 | 24 | ENSOARG00000024578 |
| ENSOARG00000025900 |         | 38964478 | 39079933 | 24 | ENSOARG00000025024 |
| ENSOARG00000025901 |         | 39157209 | 39160570 | 24 | ENSOARG00000014716 |
| ENSOARG00000025902 |         | 40413481 | 40551726 | 24 | ENSOARG00000015027 |
| ENSOARG00000025903 |         | 40462329 | 40463477 | 24 | ENSOARG00000026012 |
| ENSOARG00000025906 |         | 40565957 | 40580901 | 24 | ENSOARG00000004800 |
| ENSOARG00000025907 |         | 40590851 | 40620365 | 24 |                    |

Supplementary Table S3. Top 1% genes as candidates for selective signals using Rsb test on 26 sheep autosomes for: a) IR and IN breeds, b) IR and AF breeds, c) IN and AF breeds.

| Gene.stable.ID      | <b>a</b>  |            |           |          | Gene.stable.ID       | <b>b</b>    |            |           |          | Gene.stable.ID      | <b>c</b>  |            |           |          |
|---------------------|-----------|------------|-----------|----------|----------------------|-------------|------------|-----------|----------|---------------------|-----------|------------|-----------|----------|
|                     | Gene.name | Gene.start | Gene.end  | Chr.name |                      | Gene.name   | Gene.start | Gene.end  | Chr.name |                     | Gene.name | Gene.start | Gene.end  | Chr.name |
| ENSOARG00000001069  | GOLIM4    | 217358248  | 217440402 | 1        | ENSOARG000000003449  | KPNA7       | 231368088  | 231455602 | 1        | ENSOARG000000003449 | GPR149    | 231368088  | 231455602 | 1        |
| ENSOARG000000006715 | PXYLP1    | 245708917  | 245795592 | 1        | ENSOARG000000003740  | IL4R        | 234108818  | 234120665 | 1        | ENSOARG000000003740 | SUCNR1    | 234108818  | 234120665 | 1        |
| ENSOARG000000013878 | DOP1B     | 266507332  | 266631255 | 1        | ENSOARG000000003815  | IL21R       | 234266541  | 234289075 | 1        | ENSOARG000000004273 | CLRN1     | 235210034  | 235254936 | 1        |
| ENSOARG000000014030 | CLDN14    | 266776355  | 266777907 | 1        | ENSOARG000000003857  |             | 234351940  | 234380044 | 1        | ENSOARG000000004317 | MINDY4B   | 235291097  | 235319185 | 1        |
| ENSOARG000000014072 | SIM2      | 267018135  | 267070595 | 1        | ENSOARG000000004273  | U6          | 235210034  | 235254936 | 1        | ENSOARG000000004352 | SIAH2     | 235410094  | 235429513 | 1        |
| ENSOARG000000014127 | HLCS      | 267077034  | 267288456 | 1        | ENSOARG000000004317  |             | 235291097  | 235319185 | 1        | ENSOARG000000004604 | TSC22D2   | 235714439  | 235757736 | 1        |
| ENSOARG000000014488 | ERG       | 268709089  | 268782327 | 1        | ENSOARG000000004352  | Metazoa_SRP | 235410094  | 235429513 | 1        | ENSOARG000000004241 | 5S_rRNA   | 235700178  | 235700288 | 1        |
| ENSOARG000000014986 | CYYR1     | 128046415  | 128160518 | 1        | ENSOARG000000004459  |             | 235554016  | 235579046 | 1        | ENSOARG000000010057 | LRP1B     | 167894700  | 168966473 | 2        |
| ENSOARG000000017506 | TLCD4     | 71439658   | 71503934  | 1        | ENSOARG000000004511  | U6          | 235602581  | 235641111 | 1        | ENSOARG000000013044 |           | 66897804   | 66998532  | 2        |
| ENSOARG000000017518 | RWDD3     | 71552433   | 71562707  | 1        | ENSOARG000000004604  |             | 235714439  | 235757736 | 1        | ENSOARG000000014195 | TMEFF2    | 193228532  | 193510876 | 2        |
| ENSOARG000000017549 | DPYD      | 73433343   | 74364967  | 1        | ENSOARG000000004641  | 5S_rRNA     | 236245001  | 236250588 | 1        | ENSOARG000000014874 | SCARA5    | 101069669  | 101198536 | 2        |
| ENSOARG000000019204 |           | 6977241    | 7027543   | 1        | ENSOARG000000005319  | U6          | 237392618  | 237431369 | 1        | ENSOARG000000014887 | NUGGC     | 101230656  | 101280194 | 2        |
| ENSOARG000000019205 |           | 7030143    | 7053778   | 1        | ENSOARG000000005357  | KPNA7       | 237771275  | 237771944 | 1        | ENSOARG000000017452 | MTX2      | 132661611  | 132737409 | 2        |
| ENSOARG000000019217 | UGT1A1    | 7058779    | 7192169   | 1        | ENSOARG000000005395  | IL4R        | 237781410  | 237783997 | 1        | ENSOARG000000017462 | HOXD1     | 132820016  | 132821208 | 2        |
| ENSOARG000000019229 |           | 7116948    | 7118037   | 1        | ENSOARG000000015385  | IL21R       | 237523905  | 237524984 | 1        | ENSOARG000000017472 | HOXD3     | 132836522  | 132855765 | 2        |
| ENSOARG000000020205 | CCDC14    | 186571189  | 186616335 | 1        | ENSOARG0000000024241 |             | 235700178  | 235700288 | 1        | ENSOARG000000015027 | SYT1      | 114906496  | 115404501 | 3        |
| ENSOARG000000020214 | KALRN     | 186773857  | 187401074 | 1        | ENSOARG000000014195  | U6          | 193228532  | 193510876 | 2        | ENSOARG000000019182 | ADCY6     | 137206277  | 137224517 | 3        |
| ENSOARG000000020748 | FNDC3B    | 213189221  | 213466453 | 1        | ENSOARG000000014874  |             | 101069669  | 101198536 | 2        | ENSOARG000000019185 | TEX49     | 137227325  | 137254969 | 3        |
| ENSOARG000000020756 | PLD1      | 213745436  | 214029215 | 1        | ENSOARG000000014887  | Metazoa_SRP | 101230656  | 101280194 | 2        | ENSOARG000000024346 |           | 137221947  | 137222007 | 3        |
| ENSOARG000000020761 | TNIK      | 214087639  | 214487796 | 1        | ENSOARG000000017403  |             | 131461739  | 131588288 | 2        | ENSOARG000000003585 | ELMO1     | 59996352   | 60466308  | 4        |
| ENSOARG000000025645 |           | 266854180  | 266866713 | 1        | ENSOARG000000017452  | U6          | 132661611  | 132737409 | 2        | ENSOARG000000003703 | AOAH      | 60565422   | 60759733  | 4        |
| ENSOARG00000002229  | PTPRU     | 237110418  | 237179460 | 2        | ENSOARG000000019628  |             | 131444363  | 131446354 | 2        | ENSOARG000000004665 | KIAA0895  | 60877099   | 60931558  | 4        |
| ENSOARG000000009910 |           | 165154368  | 165495812 | 2        | ENSOARG000000019843  | 5S_rRNA     | 130839077  | 130839523 | 2        | ENSOARG000000024107 | U6        | 60610415   | 60610521  | 4        |
| ENSOARG000000010642 | GFRA2     | 43555323   | 43658786  | 2        | ENSOARG000000024578  | U6          | 193361627  | 193361713 | 2        | ENSOARG000000003387 |           | 35847680   | 35979412  | 5        |
| ENSOARG000000011082 | GABBR2    | 48929785   | 49175240  | 2        | ENSOARG000000015027  | KPNA7       | 114906496  | 115404501 | 3        | ENSOARG000000024846 | MIR9-2    | 85551918   | 85552004  | 5        |
| ENSOARG000000014059 | BNC2      | 84290339   | 84688738  | 2        | ENSOARG000000003703  | IL4R        | 60565422   | 60759733  | 4        | ENSOARG000000011975 | MOB1B     | 85922030   | 85945597  | 6        |
| ENSOARG000000014195 | TMEFF2    | 193228532  | 193510876 | 2        | ENSOARG000000024107  | IL21R       | 60610415   | 60610521  | 4        | ENSOARG000000012101 | DCK       | 85956079   | 85979964  | 6        |
| ENSOARG000000014501 | CAAP1     | 94480790   | 94556081  | 2        | ENSOARG000000012101  |             | 85956079   | 85979964  | 6        | ENSOARG000000000713 |           | 25034849   | 25035784  | 7        |
| ENSOARG000000015828 |           | 201095999  | 201136885 | 2        | ENSOARG000000003122  | U6          | 96996666   | 97038856  | 7        | ENSOARG000000019846 |           | 25018237   | 25019457  | 7        |
| ENSOARG000000017403 | AGPS      | 131461739  | 131588288 | 2        | ENSOARG000000003163  |             | 97057628   | 97126110  | 7        | ENSOARG000000021039 | BLOC1S6   | 61879421   | 61912418  | 7        |

|                    |          |           |           |   |                     |             |          |          |    |                     |         |          |          |    |
|--------------------|----------|-----------|-----------|---|---------------------|-------------|----------|----------|----|---------------------|---------|----------|----------|----|
| ENSOARG00000017442 | HNRNPA3  | 131764126 | 131772092 | 2 | ENSOARG00000003198  | Metazoa_SRP | 97148925 | 97186147 | 7  | ENSOARG000000008715 | MTSS1   | 28261745 | 28421317 | 9  |
| ENSOARG00000018381 | PARD3B   | 205957943 | 206670334 | 2 | ENSOARG00000003285  |             | 97190353 | 97312451 | 7  | ENSOARG000000008825 | NDUFB9  | 28424418 | 28431883 | 9  |
| ENSOARG00000019628 |          | 131444363 | 131446354 | 2 | ENSOARG000000021037 | U6          | 61798658 | 61834331 | 7  | ENSOARG000000008916 | TATDN1  | 28431947 | 28462592 | 9  |
| ENSOARG00000020671 | CAB39    | 231654998 | 231705560 | 2 | ENSOARG000000021039 |             | 61879421 | 61912418 | 7  | ENSOARG000000009072 | RNF139  | 28463518 | 28485500 | 9  |
| ENSOARG00000020673 | ITM2C    | 231740173 | 231752466 | 2 | ENSOARG000000021040 | 5S_rRNA     | 61937980 | 61964478 | 7  | ENSOARG000000009158 | TMEM65  | 28577331 | 28591415 | 9  |
| ENSOARG00000020675 | SPATA3   | 231875615 | 231882882 | 2 | ENSOARG000000026714 | U6          | 61937799 | 62039205 | 7  | ENSOARG000000011105 |         | 31854222 | 31870373 | 9  |
| ENSOARG00000020677 |          | 231918490 | 231924826 | 2 | ENSOARG000000008715 | KPNA7       | 28261745 | 28421317 | 9  | ENSOARG000000011169 |         | 31967164 | 31967945 | 9  |
| ENSOARG00000021976 |          | 131772093 | 131772166 | 2 | ENSOARG000000009072 | IL4R        | 28463518 | 28485500 | 9  | ENSOARG000000011206 | SPIDR   | 31974008 | 32251760 | 9  |
| ENSOARG00000022347 | 5S_rRNA  | 43652479  | 43652596  | 2 | ENSOARG000000009158 | IL21R       | 28577331 | 28591415 | 9  | ENSOARG000000013119 | SNTG1   | 33284698 | 33536484 | 9  |
| ENSOARG00000023938 |          | 159692299 | 159692370 | 2 | ENSOARG000000011105 |             | 31854222 | 31870373 | 9  | ENSOARG000000013523 |         | 34288898 | 34292049 | 9  |
| ENSOARG00000002277 |          | 1442982   | 2818577   | 3 | ENSOARG000000011169 | U6          | 31967164 | 31967945 | 9  | ENSOARG000000013762 | OPRK1   | 34559945 | 34587699 | 9  |
| ENSOARG00000009844 | RAD51AP1 | 209543164 | 209559806 | 3 | ENSOARG000000011206 |             | 31974008 | 32251760 | 9  | ENSOARG000000013787 | ATP6V1H | 34692808 | 34737156 | 9  |
| ENSOARG00000009922 |          | 209562723 | 209603814 | 3 | ENSOARG000000013119 | Metazoa_SRP | 33284698 | 33536484 | 9  | ENSOARG000000013873 | RGS20   | 34741563 | 34788644 | 9  |
| ENSOARG00000013205 | RFX8     | 100064145 | 100112455 | 3 | ENSOARG000000013523 |             | 34288898 | 34292049 | 9  | ENSOARG000000013906 | TCEA1   | 34792204 | 34809864 | 9  |
| ENSOARG00000015027 | SYT1     | 114906496 | 115404501 | 3 | ENSOARG000000013762 | U6          | 34559945 | 34587699 | 9  | ENSOARG000000013994 | LYPLA1  | 34828218 | 34843128 | 9  |
| ENSOARG00000015037 |          | 115491774 | 115599738 | 3 | ENSOARG000000013787 |             | 34692808 | 34737156 | 9  | ENSOARG000000014089 |         | 34852382 | 34856945 | 9  |
| ENSOARG00000015054 | PPP1R12A | 115651729 | 115819054 | 3 | ENSOARG000000013873 | 5S_rRNA     | 34741563 | 34788644 | 9  | ENSOARG000000014234 |         | 35135645 | 35277560 | 9  |
| ENSOARG00000015089 | OTOGL    | 116081170 | 116251642 | 3 | ENSOARG000000013906 | U6          | 34792204 | 34809864 | 9  | ENSOARG000000014406 |         | 35794086 | 35795583 | 9  |
| ENSOARG00000015220 | PPFIA2   | 117165907 | 117673453 | 3 | ENSOARG000000013994 | KPNA7       | 34828218 | 34843128 | 9  | ENSOARG000000015464 | CYP7A1  | 37492107 | 37500880 | 9  |
| ENSOARG00000015266 | METTL25  | 118244609 | 118352705 | 3 | ENSOARG000000014089 | IL4R        | 34852382 | 34856945 | 9  | ENSOARG000000015568 | SDCBP   | 37556752 | 37589709 | 9  |
| ENSOARG00000015680 | ATP2B1   | 125851175 | 125982479 | 3 | ENSOARG000000014234 | IL21R       | 35135645 | 35277560 | 9  | ENSOARG000000015741 | NSMAF   | 37590850 | 37637144 | 9  |
| ENSOARG00000019622 | NELL2    | 141536582 | 141928837 | 3 | ENSOARG000000014406 |             | 35794086 | 35795583 | 9  | ENSOARG000000016001 | CA8     | 38775707 | 38843863 | 9  |
| ENSOARG00000020369 | IAPP     | 193566307 | 193571714 | 3 | ENSOARG000000015346 | U6          | 37432080 | 37451172 | 9  | ENSOARG000000020172 | NPBWR1  | 34449585 | 34450325 | 9  |
| ENSOARG00000020420 |          | 193676598 | 193750422 | 3 | ENSOARG000000015464 |             | 37492107 | 37500880 | 9  | ENSOARG000000020188 |         | 37270733 | 37271020 | 9  |
| ENSOARG00000022423 | U6       | 112901292 | 112901402 | 3 | ENSOARG000000015568 | Metazoa_SRP | 37556752 | 37589709 | 9  | ENSOARG000000021727 | U6      | 27276187 | 27276292 | 9  |
| ENSOARG00000023666 |          | 115367304 | 115367384 | 3 | ENSOARG000000015741 |             | 37590850 | 37637144 | 9  | ENSOARG000000024287 | U6      | 37370449 | 37370555 | 9  |
| ENSOARG00000024268 | U6       | 193729019 | 193729125 | 3 | ENSOARG000000020172 | U6          | 34449585 | 34450325 | 9  | ENSOARG000000026519 |         | 33752330 | 33767686 | 9  |
| ENSOARG00000025922 |          | 40336878  | 40475522  | 3 | ENSOARG000000020188 |             | 37270733 | 37271020 | 9  | ENSOARG000000026523 |         | 38811461 | 38972090 | 9  |
| ENSOARG00000025940 |          | 2018023   | 2203956   | 3 | ENSOARG000000021727 | 5S_rRNA     | 27276187 | 27276292 | 9  | ENSOARG000000005401 |         | 79668729 | 79786381 | 10 |
| ENSOARG00000002931 | DOCK4    | 56152727  | 56624017  | 4 | ENSOARG000000024287 | U6          | 37370449 | 37370555 | 9  | ENSOARG000000012459 |         | 32337738 | 32342084 | 10 |
| ENSOARG00000006163 | BBS9     | 63241800  | 63694790  | 4 | ENSOARG000000005404 | KPNA7       | 80812888 | 81064030 | 10 | ENSOARG000000015029 |         | 42906101 | 43141913 | 10 |
| ENSOARG00000007341 |          | 20485907  | 20503267  | 4 | ENSOARG000000015029 | IL4R        | 42906101 | 43141913 | 10 | ENSOARG000000015071 |         | 43075598 | 43181328 | 10 |
| ENSOARG00000008109 |          | 20507640  | 20508110  | 4 | ENSOARG000000015071 | IL21R       | 43075598 | 43181328 | 10 | ENSOARG000000015136 | KLHL1   | 44398314 | 44721829 | 10 |

|                    |         |          |          |    |                    |             |          |          |    |                    |          |          |          |    |
|--------------------|---------|----------|----------|----|--------------------|-------------|----------|----------|----|--------------------|----------|----------|----------|----|
| ENSOARG00000009641 | HDAC9   | 27257256 | 27548397 | 4  | ENSOARG00000015098 |             | 44186251 | 44188129 | 10 | ENSOARG00000017100 |          | 39646385 | 39646768 | 10 |
| ENSOARG00000016894 | SEMA3C  | 39952749 | 40157229 | 4  | ENSOARG00000015136 | U6          | 44398314 | 44721829 | 10 | ENSOARG00000017107 |          | 40068359 | 40068595 | 10 |
| ENSOARG00000017020 |         | 40240542 | 40276695 | 4  | ENSOARG00000017100 |             | 39646385 | 39646768 | 10 | ENSOARG00000022137 |          | 45178360 | 45178470 | 10 |
| ENSOARG00000022219 | 7SK     | 43585193 | 43585497 | 4  | ENSOARG00000026309 | Metazoa_SRP | 42878720 | 42976582 | 10 | ENSOARG00000024940 |          | 45300770 | 45300914 | 10 |
| ENSOARG00000024498 |         | 43608738 | 43608881 | 4  | ENSOARG00000026330 |             | 80937982 | 80952858 | 10 | ENSOARG00000026309 |          | 42878720 | 42976582 | 10 |
| ENSOARG00000024559 | U1      | 27510116 | 27510282 | 4  | ENSOARG00000001311 | U6          | 27586115 | 27616932 | 11 | ENSOARG00000007848 |          | 7641415  | 8038744  | 11 |
| ENSOARG00000025221 |         | 20439819 | 20599507 | 4  | ENSOARG00000004334 |             | 27553456 | 27553671 | 11 | ENSOARG00000010714 | USH2A    | 16999001 | 17981947 | 12 |
| ENSOARG00000025231 |         | 40164548 | 40177100 | 4  | ENSOARG00000007848 | 5S_rRNA     | 7641415  | 8038744  | 11 | ENSOARG00000011335 | ESRRG    | 18028459 | 18270543 | 12 |
| ENSOARG00000014867 | MSH3    | 78070508 | 78262288 | 5  | ENSOARG00000010120 | U6          | 13398010 | 13706664 | 12 | ENSOARG00000011440 | GPATCH2  | 19041488 | 19239239 | 12 |
| ENSOARG00000016317 |         | 47131601 | 47133514 | 5  | ENSOARG00000010714 | KPNA7       | 16999001 | 17981947 | 12 | ENSOARG00000012956 | MARK1    | 22148091 | 22285882 | 12 |
| ENSOARG00000016394 | KDM3B   | 47153096 | 47208649 | 5  | ENSOARG00000011335 | IL4R        | 18028459 | 18270543 | 12 | ENSOARG00000024700 | 5S_rRNA  | 11765649 | 11765767 | 12 |
| ENSOARG00000016711 | FAM172A | 90442594 | 90837397 | 5  | ENSOARG00000011440 | IL21R       | 19041488 | 19239239 | 12 | ENSOARG00000025432 |          | 15688758 | 15744623 | 12 |
| ENSOARG00000017471 | PFDN1   | 48825562 | 48896702 | 5  | ENSOARG00000011583 |             | 19934865 | 20025740 | 12 | ENSOARG00000005021 | C11orf49 | 75082024 | 75292560 | 15 |
| ENSOARG00000024846 | MIR9-2  | 85551918 | 85552004 | 5  | ENSOARG00000012333 | U6          | 21715224 | 21761741 | 12 | ENSOARG00000022253 | U6       | 75207209 | 75207281 | 15 |
| ENSOARG00000010430 | PPA2    | 19864955 | 19945670 | 6  | ENSOARG00000012654 |             | 21760318 | 21865369 | 12 | ENSOARG00000013279 | TRIO     | 58524569 | 58764835 | 16 |
| ENSOARG00000014775 | CXCL1   | 88610487 | 88611559 | 6  | ENSOARG00000012956 | Metazoa_SRP | 22148091 | 22285882 | 12 | ENSOARG00000026449 |          | 42640907 | 42757716 | 18 |
| ENSOARG00000016907 | UNC5C   | 29146028 | 29348864 | 6  | ENSOARG00000021397 |             | 13457544 | 13457637 | 12 | ENSOARG00000018783 | RPP40    | 48496563 | 48508914 | 20 |
| ENSOARG00000017161 | BMPR1B  | 29361947 | 29448079 | 6  | ENSOARG00000022476 | U6          | 21735312 | 21735408 | 12 | ENSOARG00000020118 |          | 48472029 | 48472196 | 20 |
| ENSOARG00000025038 | U6      | 19846738 | 19846844 | 6  | ENSOARG00000024577 |             | 21735009 | 21735118 | 12 | ENSOARG00000006933 | RSF1     | 17628601 | 17727239 | 21 |
| ENSOARG00000003163 | PTPN21  | 97057628 | 97126110 | 7  | ENSOARG00000024981 | 5S_rRNA     | 19968594 | 19968693 | 12 | ENSOARG00000007125 |          | 17740943 | 17758684 | 21 |
| ENSOARG00000003363 |         | 97934898 | 98128215 | 7  | ENSOARG00000025432 | U6          | 15688758 | 15744623 | 12 | ENSOARG00000007178 | AQP11    | 17772141 | 17783694 | 21 |
| ENSOARG00000004872 | MPC1    | 87995562 | 87996759 | 8  | ENSOARG00000017959 | KPNA7       | 58073348 | 58092870 | 13 | ENSOARG00000002358 |          | 22592000 | 22601336 | 22 |
| ENSOARG00000027012 |         | 33968090 | 33980976 | 8  | ENSOARG00000018002 | IL4R        | 58100842 | 58115189 | 13 | ENSOARG00000002541 | AS3MT    | 22608612 | 22624523 | 22 |
| ENSOARG00000004737 | CPQ     | 79583307 | 80022406 | 9  | ENSOARG00000018039 | IL21R       | 58173131 | 58255337 | 13 | ENSOARG00000011479 | CRTAC1   | 18239819 | 18367698 | 22 |
| ENSOARG00000016708 | NKAIN3  | 40545562 | 40801846 | 9  | ENSOARG00000013279 |             | 58524569 | 58764835 | 16 | ENSOARG00000021318 |          | 18433127 | 18433187 | 22 |
| ENSOARG00000023353 |         | 38500803 | 38500929 | 9  | ENSOARG00000013859 | U6          | 61653247 | 62142024 | 16 | ENSOARG00000000089 | GTF3C1   | 25010620 | 25089541 | 24 |
| ENSOARG00000024940 |         | 45300770 | 45300914 | 10 | ENSOARG00000026888 |             | 46594647 | 46727238 | 20 | ENSOARG00000000110 | SMURF1   | 37110700 | 37133651 | 24 |
| ENSOARG00000003396 | RAB34   | 19766081 | 19768816 | 11 | ENSOARG00000002358 | Metazoa_SRP | 22592000 | 22601336 | 22 | ENSOARG00000000347 | TRRAP    | 37140796 | 37227404 | 24 |
| ENSOARG00000003480 | RPL23A  | 19771126 | 19774188 | 11 | ENSOARG00000002541 |             | 22608612 | 22624523 | 22 | ENSOARG00000000439 | KIAA0556 | 25089816 | 25321497 | 24 |
| ENSOARG00000003633 | TLCD1   | 19774814 | 19776010 | 11 | ENSOARG00000002693 | U6          | 22638602 | 22803964 | 22 | ENSOARG00000000602 | NPTX2    | 37374225 | 37384919 | 24 |
| ENSOARG00000003806 | NEK8    | 19779100 | 19786873 | 11 | ENSOARG00000010847 |             | 17972993 | 17975270 | 22 | ENSOARG00000000845 |          | 25333567 | 25379060 | 24 |
| ENSOARG00000004112 | TRAF4   | 19788399 | 19794104 | 11 | ENSOARG00000010881 | 5S_rRNA     | 17977310 | 17986653 | 22 | ENSOARG00000001158 | LAT      | 25866851 | 25870792 | 24 |
| ENSOARG00000004162 | FAM222B | 19799477 | 19808342 | 11 | ENSOARG00000010934 | U6          | 17987695 | 18009405 | 22 | ENSOARG00000001555 | NFATC2IP | 25890362 | 25899904 | 24 |



|                    |         |          |          |    |                    |             |          |          |    |                    |          |          |          |    |
|--------------------|---------|----------|----------|----|--------------------|-------------|----------|----------|----|--------------------|----------|----------|----------|----|
| ENSOARG0000004706  | FLOT2   | 19878859 | 19898145 | 11 | ENSOARG00000010955 | KPNA7       | 17992016 | 17992681 | 22 | ENSOARG00000001710 | CD19     | 25905178 | 25915071 | 24 |
| ENSOARG00000004860 | DHRS13  | 19895557 | 19899827 | 11 | ENSOARG00000011479 | IL4R        | 18239819 | 18367698 | 22 | ENSOARG00000001825 | RABEP2   | 25921006 | 25932126 | 24 |
| ENSOARG00000005023 | PHF12   | 19899684 | 19940512 | 11 | ENSOARG00000021318 | IL21R       | 18433127 | 18433187 | 22 | ENSOARG00000002132 | ATP2A1   | 25931953 | 25950361 | 24 |
| ENSOARG00000006006 | MYO18A  | 20058835 | 20151305 | 11 | ENSOARG00000000089 |             | 25010620 | 25089541 | 24 | ENSOARG00000002503 | ATXN2L   | 25982899 | 25992849 | 24 |
| ENSOARG00000006550 | CRYBA1  | 20215842 | 20222612 | 11 | ENSOARG00000000110 | U6          | 37110700 | 37133651 | 24 | ENSOARG00000002826 |          | 25997816 | 25998752 | 24 |
| ENSOARG00000006793 | TAOK1   | 20329392 | 20426865 | 11 | ENSOARG00000000347 |             | 37140796 | 37227404 | 24 | ENSOARG00000002892 |          | 26017951 | 26038745 | 24 |
| ENSOARG00000009443 | SRCIN1  | 38713890 | 38782542 | 11 | ENSOARG00000000439 | Metazoa_SRP | 25089816 | 25321497 | 24 | ENSOARG00000002994 |          | 26052066 | 26063735 | 24 |
| ENSOARG00000011855 |         | 45762020 | 45802167 | 11 | ENSOARG00000000602 |             | 37374225 | 37384919 | 24 | ENSOARG00000003124 |          | 26065424 | 26069206 | 24 |
| ENSOARG00000011927 | EFCAB3  | 45819006 | 46286165 | 11 | ENSOARG00000000845 | U6          | 25333567 | 25379060 | 24 | ENSOARG00000003180 | IL27     | 26070181 | 26075232 | 24 |
| ENSOARG00000012039 |         | 45819006 | 45874585 | 11 | ENSOARG00000001555 |             | 25890362 | 25899904 | 24 | ENSOARG00000003465 | RADIL    | 39012202 | 39064415 | 24 |
| ENSOARG00000012739 | TANC2   | 46811589 | 47176828 | 11 | ENSOARG00000001710 | 5S_rRNA     | 25905178 | 25915071 | 24 | ENSOARG00000003582 | AP5Z1    | 39064376 | 39072830 | 24 |
| ENSOARG00000021706 | SNORD42 | 19771567 | 19771634 | 11 | ENSOARG00000001825 | U6          | 25921006 | 25932126 | 24 | ENSOARG00000003718 | MAPK3    | 26187757 | 26198895 | 24 |
| ENSOARG00000022066 | SNORD4A | 19772880 | 19772949 | 11 | ENSOARG00000002132 | KPNA7       | 25931953 | 25950361 | 24 | ENSOARG00000003771 | GDPD3    | 26195548 | 26200790 | 24 |
| ENSOARG00000022595 | U1      | 45765834 | 45765989 | 11 | ENSOARG00000002503 | IL4R        | 25982899 | 25992849 | 24 | ENSOARG00000003856 |          | 39315644 | 39568156 | 24 |
| ENSOARG00000023093 | SNORD4B | 19774020 | 19774090 | 11 | ENSOARG00000002826 | IL21R       | 25997816 | 25998752 | 24 | ENSOARG00000003882 | YPEL3    | 26202421 | 26205022 | 24 |
| ENSOARG00000023268 | 5S_rRNA | 19809497 | 19809594 | 11 | ENSOARG00000002892 |             | 26017951 | 26038745 | 24 | ENSOARG00000004040 | TBX6     | 26206479 | 26210145 | 24 |
| ENSOARG00000024270 | SNORA72 | 20171313 | 20171444 | 11 | ENSOARG00000002994 | U6          | 26052066 | 26063735 | 24 | ENSOARG00000004100 | PPP4C    | 26211200 | 26218665 | 24 |
| ENSOARG00000026357 |         | 20164604 | 20214384 | 11 | ENSOARG00000003124 |             | 26065424 | 26069206 | 24 | ENSOARG00000004143 |          | 26218820 | 26227471 | 24 |
| ENSOARG00000005173 |         | 47936746 | 47937063 | 12 | ENSOARG00000003180 | Metazoa_SRP | 26070181 | 26075232 | 24 | ENSOARG00000004356 | CARD11   | 40316370 | 40355402 | 24 |
| ENSOARG00000007971 |         | 4582491  | 4601032  | 12 | ENSOARG00000003465 |             | 39012202 | 39064415 | 24 | ENSOARG00000004437 | GNA12    | 40358096 | 40462023 | 24 |
| ENSOARG00000009688 |         | 42897047 | 43151892 | 12 | ENSOARG00000003582 | U6          | 39064376 | 39072830 | 24 | ENSOARG00000004504 | AMZ1     | 40472597 | 40484725 | 24 |
| ENSOARG00000009776 |         | 43048095 | 43049619 | 12 | ENSOARG00000003718 |             | 26187757 | 26198895 | 24 | ENSOARG00000004594 |          | 40504639 | 40511497 | 24 |
| ENSOARG00000014362 | COP1    | 55270060 | 55448384 | 12 | ENSOARG00000003771 | 5S_rRNA     | 26195548 | 26200790 | 24 | ENSOARG00000004697 | IQCE     | 40511246 | 40551800 | 24 |
| ENSOARG00000002139 | TTL9    | 60717466 | 60772689 | 13 | ENSOARG00000003856 | U6          | 39315644 | 39568156 | 24 | ENSOARG00000005030 | KCTD13   | 26354516 | 26367538 | 24 |
| ENSOARG00000002416 | PDRG1   | 60775487 | 60781584 | 13 | ENSOARG00000003882 | KPNA7       | 26202421 | 26205022 | 24 | ENSOARG00000005071 | GRIFIN   | 40661527 | 40662687 | 24 |
| ENSOARG00000002627 | ATRN    | 50871319 | 51003428 | 13 | ENSOARG00000004040 | IL4R        | 26206479 | 26210145 | 24 | ENSOARG00000005092 | ASPHD1   | 26368344 | 26371923 | 24 |
| ENSOARG00000002824 |         | 70279996 | 70565519 | 13 | ENSOARG00000004100 | IL21R       | 26211200 | 26218665 | 24 | ENSOARG00000005130 | SEZ6L2   | 26373702 | 26393367 | 24 |
| ENSOARG00000004955 | PTPRA   | 51465912 | 51530581 | 13 | ENSOARG00000004143 |             | 26218820 | 26227471 | 24 | ENSOARG00000005487 |          | 26443971 | 26493101 | 24 |
| ENSOARG00000005666 | CPXM1   | 51707797 | 51714249 | 13 | ENSOARG00000004356 | U6          | 40316370 | 40355402 | 24 | ENSOARG00000005716 | QPRT     | 26506332 | 26507999 | 24 |
| ENSOARG00000006341 | IDH3B   | 51851446 | 51856015 | 13 | ENSOARG00000004437 |             | 40358096 | 40462023 | 24 | ENSOARG00000005724 |          | 26526804 | 26528279 | 24 |
| ENSOARG00000006470 | NOP56   | 51856440 | 51861821 | 13 | ENSOARG00000004504 | Metazoa_SRP | 40472597 | 40484725 | 24 | ENSOARG00000005865 | CD2BP2   | 26558468 | 26560111 | 24 |
| ENSOARG00000016821 |         | 36350793 | 36353304 | 13 | ENSOARG00000004594 |             | 40504639 | 40511497 | 24 | ENSOARG00000005979 | TBC1D10B | 26563335 | 26573288 | 24 |
| ENSOARG00000018039 | BMP7    | 58173131 | 58255337 | 13 | ENSOARG00000004697 | U6          | 40511246 | 40551800 | 24 | ENSOARG00000006071 | MYLPF    | 26577862 | 26579570 | 24 |

|                    |          |          |          |    |                    |             |          |          |    |                    |          |          |          |    |
|--------------------|----------|----------|----------|----|--------------------|-------------|----------|----------|----|--------------------|----------|----------|----------|----|
| ENSOARG00000021353 | SNORD57  | 51857762 | 51857832 | 13 | ENSOARG00000005030 |             | 26354516 | 26367538 | 24 | ENSOARG00000006135 | SEPTIN1  | 26580136 | 26583513 | 24 |
| ENSOARG00000021529 |          | 51859560 | 51859695 | 13 | ENSOARG00000005092 | 5S_rRNA     | 26368344 | 26371923 | 24 | ENSOARG00000006258 |          | 26603368 | 26610707 | 24 |
| ENSOARG00000023567 | SNORD86  | 51858587 | 51858672 | 13 | ENSOARG00000005130 | U6          | 26373702 | 26393367 | 24 | ENSOARG00000006284 | DCTPP1   | 26614394 | 26617494 | 24 |
| ENSOARG00000023890 | SNORD110 | 51860461 | 51860532 | 13 | ENSOARG00000005487 | KPNA7       | 26443971 | 26493101 | 24 | ENSOARG00000006294 |          | 26629126 | 26630460 | 24 |
| ENSOARG00000024011 | SNORD56  | 51858091 | 51858161 | 13 | ENSOARG00000005716 | IL4R        | 26506332 | 26507999 | 24 | ENSOARG00000006423 | ITGAL    | 26679858 | 26721693 | 24 |
| ENSOARG00000026237 |          | 48604903 | 48851165 | 13 | ENSOARG00000005724 | IL21R       | 26526804 | 26528279 | 24 | ENSOARG00000006854 | PRR14    | 26793302 | 26798414 | 24 |
| ENSOARG00000002020 | NLRP2    | 59657921 | 59687108 | 14 | ENSOARG00000005865 |             | 26558468 | 26560111 | 24 | ENSOARG00000006922 | FBRS     | 26801050 | 26811701 | 24 |
| ENSOARG00000002099 |          | 59701679 | 59708054 | 14 | ENSOARG00000005979 | U6          | 26563335 | 26573288 | 24 | ENSOARG00000007922 | BCL7C    | 26980759 | 26985417 | 24 |
| ENSOARG00000002108 |          | 59711324 | 59721587 | 14 | ENSOARG00000006071 |             | 26577862 | 26579570 | 24 | ENSOARG00000008040 |          | 26987973 | 26990899 | 24 |
| ENSOARG00000002120 |          | 59732746 | 59746310 | 14 | ENSOARG00000006135 | Metazoa_SRP | 26580136 | 26583513 | 24 | ENSOARG00000008120 | FBXL19   | 27052748 | 27071677 | 24 |
| ENSOARG00000002157 | NCR1     | 59754651 | 59759266 | 14 | ENSOARG00000006258 |             | 26603368 | 26610707 | 24 | ENSOARG00000008151 | ORAI3    | 27073875 | 27081653 | 24 |
| ENSOARG00000009370 | NECTIN2  | 51660177 | 51687767 | 14 | ENSOARG00000006284 | U6          | 26614394 | 26617494 | 24 | ENSOARG00000008207 |          | 27082568 | 27104615 | 24 |
| ENSOARG00000009405 | TOMM40   | 51689549 | 51700871 | 14 | ENSOARG00000006294 |             | 26629126 | 26630460 | 24 | ENSOARG00000008255 | HSD3B7   | 27106043 | 27108526 | 24 |
| ENSOARG00000009438 | APOE     | 51709732 | 51711208 | 14 | ENSOARG00000006423 | 5S_rRNA     | 26679858 | 26721693 | 24 | ENSOARG00000008744 | KAT8     | 27211624 | 27221382 | 24 |
| ENSOARG00000003068 |          | 2812872  | 2851062  | 15 | ENSOARG00000006854 | U6          | 26793302 | 26798414 | 24 | ENSOARG00000008811 |          | 27222406 | 27226048 | 24 |
| ENSOARG00000006475 |          | 48654209 | 48655153 | 15 | ENSOARG00000006922 | KPNA7       | 26801050 | 26811701 | 24 | ENSOARG00000008863 |          | 27229167 | 27231806 | 24 |
| ENSOARG00000006490 |          | 48681015 | 48681971 | 15 | ENSOARG00000007922 | IL4R        | 26980759 | 26985417 | 24 | ENSOARG00000008869 |          | 27259119 | 27265626 | 24 |
| ENSOARG00000006579 |          | 48921683 | 48922636 | 15 | ENSOARG00000008040 | IL21R       | 26987973 | 26990899 | 24 | ENSOARG00000008908 | PYCARD   | 27279014 | 27280168 | 24 |
| ENSOARG00000006597 |          | 48961624 | 48962577 | 15 | ENSOARG00000008120 |             | 27052748 | 27071677 | 24 | ENSOARG00000008958 | TRIM72   | 27290363 | 27297934 | 24 |
| ENSOARG00000015265 | EIF3F    | 44084299 | 44091753 | 15 | ENSOARG00000008151 | U6          | 27073875 | 27081653 | 24 | ENSOARG00000009000 | ITGAM    | 27341076 | 27384550 | 24 |
| ENSOARG00000015306 |          | 44116583 | 44132850 | 15 | ENSOARG00000008207 |             | 27082568 | 27104615 | 24 | ENSOARG00000009130 | ITGAX    | 27400568 | 27419288 | 24 |
| ENSOARG00000011449 | PRLR     | 38969273 | 39028126 | 16 | ENSOARG00000008255 | Metazoa_SRP | 27106043 | 27108526 | 24 | ENSOARG00000009250 |          | 27446741 | 27473467 | 24 |
| ENSOARG00000026968 |          | 40674484 | 40697370 | 16 | ENSOARG00000008744 |             | 27211624 | 27221382 | 24 | ENSOARG00000009432 | COX6A2   | 27474854 | 27475391 | 24 |
| ENSOARG00000004783 | CMKLR1   | 64260293 | 64261387 | 17 | ENSOARG00000008811 | U6          | 27222406 | 27226048 | 24 | ENSOARG00000009484 | ARMC5    | 27490512 | 27497969 | 24 |
| ENSOARG00000007059 |          | 44135465 | 44136040 | 18 | ENSOARG00000008863 |             | 27229167 | 27231806 | 24 | ENSOARG00000009529 | TGFB11   | 27500166 | 27506161 | 24 |
| ENSOARG00000007087 |          | 44166626 | 44194878 | 18 | ENSOARG00000008869 | 5S_rRNA     | 27259119 | 27265626 | 24 | ENSOARG00000009632 | SLC5A2   | 27512274 | 27518884 | 24 |
| ENSOARG00000007299 | PPP2R3C  | 44263406 | 44291760 | 18 | ENSOARG00000008908 | U6          | 27279014 | 27280168 | 24 | ENSOARG00000009760 | RUSF1    | 27519186 | 27533843 | 24 |
| ENSOARG00000007351 |          | 44292540 | 44425667 | 18 | ENSOARG00000008958 | KPNA7       | 27290363 | 27297934 | 24 | ENSOARG00000009817 | SEPTIN14 | 27566765 | 27582185 | 24 |
| ENSOARG00000007502 | NFKBIA   | 44533631 | 44538036 | 18 | ENSOARG00000009000 | IL4R        | 27341076 | 27384550 | 24 | ENSOARG00000009864 |          | 27613500 | 27618310 | 24 |
| ENSOARG00000010742 | AGBL1    | 16183925 | 16783433 | 18 | ENSOARG00000009130 | IL21R       | 27400568 | 27419288 | 24 | ENSOARG00000010011 |          | 27708661 | 27717935 | 24 |
| ENSOARG00000015742 | IL16     | 26027666 | 26139840 | 18 | ENSOARG00000009250 |             | 27446741 | 27473467 | 24 | ENSOARG00000010109 |          | 27719967 | 27730172 | 24 |
| ENSOARG00000021308 | U6       | 44547039 | 44547145 | 18 | ENSOARG00000009432 | U6          | 27474854 | 27475391 | 24 | ENSOARG00000010150 | PHKG1    | 27731323 | 27736862 | 24 |
| ENSOARG00000024702 |          | 34383351 | 34383431 | 18 | ENSOARG00000009484 |             | 27490512 | 27497969 | 24 | ENSOARG00000010228 |          | 27743597 | 27746528 | 24 |

|                    |          |          |          |    |                    |             |          |          |    |                    |          |          |          |    |
|--------------------|----------|----------|----------|----|--------------------|-------------|----------|----------|----|--------------------|----------|----------|----------|----|
| ENSOARG0000000458  | SFMBT1   | 47861509 | 47970530 | 19 | ENSOARG00000009529 | Metazoa_SRP | 27500166 | 27506161 | 24 | ENSOARG00000010380 | CRCP     | 27932583 | 27968175 | 24 |
| ENSOARG00000001440 | WNT7A    | 57988969 | 58046629 | 19 | ENSOARG00000009632 |             | 27512274 | 27518884 | 24 | ENSOARG00000010453 | TPST1    | 28032989 | 28099175 | 24 |
| ENSOARG00000012867 | VGLL4    | 55462990 | 55496963 | 19 | ENSOARG00000009760 | U6          | 27519186 | 27533843 | 24 | ENSOARG00000010507 | RABGEF1  | 28157577 | 28180855 | 24 |
| ENSOARG00000015375 | ERC2     | 44591299 | 45551630 | 19 | ENSOARG00000009817 |             | 27566765 | 27582185 | 24 | ENSOARG00000010673 |          | 28285509 | 28426315 | 24 |
| ENSOARG00000010300 | SUPT3H   | 18310799 | 18706618 | 20 | ENSOARG00000009864 | 5S_rRNA     | 27613500 | 27618310 | 24 | ENSOARG00000010710 | CALN1    | 28550611 | 29016799 | 24 |
| ENSOARG00000010772 | ILRUN    | 8762327  | 8806919  | 20 | ENSOARG00000010011 | U6          | 27708661 | 27717935 | 24 | ENSOARG00000010716 |          | 16421625 | 16421954 | 24 |
| ENSOARG00000011006 |          | 8986174  | 8993970  | 20 | ENSOARG00000010109 | KPNA7       | 27719967 | 27730172 | 24 | ENSOARG00000010731 |          | 29062550 | 29089745 | 24 |
| ENSOARG00000014123 | PI16     | 10946568 | 10957116 | 20 | ENSOARG00000010150 | IL4R        | 27731323 | 27736862 | 24 | ENSOARG00000010743 |          | 23023376 | 23024338 | 24 |
| ENSOARG00000014201 |          | 10963849 | 10980577 | 20 | ENSOARG00000010228 | IL21R       | 27743597 | 27746528 | 24 | ENSOARG00000010753 |          | 23768794 | 23769432 | 24 |
| ENSOARG00000022664 | 5S_rRNA  | 18421702 | 18421834 | 20 | ENSOARG00000010380 |             | 27932583 | 27968175 | 24 | ENSOARG00000010757 |          | 29716072 | 29739127 | 24 |
| ENSOARG00000025135 |          | 8644046  | 8644135  | 20 | ENSOARG00000010453 | U6          | 28032989 | 28099175 | 24 | ENSOARG00000010767 |          | 26561711 | 26562259 | 24 |
| ENSOARG00000003523 | RAB1B    | 43626127 | 43634738 | 21 | ENSOARG00000010507 |             | 28157577 | 28180855 | 24 | ENSOARG00000010858 |          | 35467228 | 35467917 | 24 |
| ENSOARG00000003549 | CNIH2    | 43635150 | 43640422 | 21 | ENSOARG00000010673 | Metazoa_SRP | 28285509 | 28426315 | 24 | ENSOARG00000010866 |          | 17182255 | 17182446 | 24 |
| ENSOARG00000003628 | YIF1A    | 43641414 | 43645241 | 21 | ENSOARG00000010710 |             | 28550611 | 29016799 | 24 | ENSOARG00000010928 | SMG1     | 16411396 | 16483879 | 24 |
| ENSOARG00000003837 | TMEM151A | 43647082 | 43651665 | 21 | ENSOARG00000010716 | U6          | 16421625 | 16421954 | 24 | ENSOARG00000011276 |          | 32699946 | 32762145 | 24 |
| ENSOARG00000003798 | PLCE1    | 14970716 | 15337763 | 22 | ENSOARG00000010731 |             | 29062550 | 29089745 | 24 | ENSOARG00000011464 | SYT17    | 16671492 | 16750884 | 24 |
| ENSOARG00000013080 | DOCK1    | 45364051 | 45875506 | 22 | ENSOARG00000010743 | 5S_rRNA     | 23023376 | 23024338 | 24 | ENSOARG00000011839 | TMC5     | 16976908 | 17040297 | 24 |
| ENSOARG00000026741 |          | 14970716 | 15052778 | 22 | ENSOARG00000010753 | U6          | 23768794 | 23769432 | 24 | ENSOARG00000012008 | GDE1     | 17049328 | 17074699 | 24 |
| ENSOARG00000004732 | DCC      | 52377386 | 53214438 | 23 | ENSOARG00000010757 | KPNA7       | 29716072 | 29739127 | 24 | ENSOARG00000012037 |          | 17063475 | 17064629 | 24 |
| ENSOARG00000024531 | U6       | 18034837 | 18034933 | 23 | ENSOARG00000010767 | IL4R        | 26561711 | 26562259 | 24 | ENSOARG00000012082 | CCP110   | 17081831 | 17098590 | 24 |
| ENSOARG00000010332 | SH2D4B   | 35539285 | 35620062 | 25 | ENSOARG00000010816 | IL21R       | 32523290 | 32571028 | 24 | ENSOARG00000012249 | VPS35L   | 17113331 | 17243756 | 24 |
| ENSOARG00000001975 |          | 33053238 | 33156974 | 26 | ENSOARG00000010858 |             | 35467228 | 35467917 | 24 | ENSOARG00000012389 | GPRC5B   | 17416805 | 17426893 | 24 |
| ENSOARG00000006442 | SBD2     | 5979383  | 5981052  | 26 | ENSOARG00000010866 | U6          | 17182255 | 17182446 | 24 | ENSOARG00000013593 |          | 34135113 | 34165507 | 24 |
|                    |          |          |          |    | ENSOARG00000010928 |             | 16411396 | 16483879 | 24 | ENSOARG00000013650 | MDH2     | 34164879 | 34177170 | 24 |
|                    |          |          |          |    | ENSOARG00000011464 | Metazoa_SRP | 16671492 | 16750884 | 24 | ENSOARG00000013722 | SRRM3    | 34217112 | 34247460 | 24 |
|                    |          |          |          |    | ENSOARG00000011839 |             | 16976908 | 17040297 | 24 | ENSOARG00000013748 | HSPB1    | 34256246 | 34257717 | 24 |
|                    |          |          |          |    | ENSOARG00000012008 | U6          | 17049328 | 17074699 | 24 | ENSOARG00000014682 |          | 19098694 | 19358510 | 24 |
|                    |          |          |          |    | ENSOARG00000012037 |             | 17063475 | 17064629 | 24 | ENSOARG00000014711 | COL26A1  | 35124398 | 35319320 | 24 |
|                    |          |          |          |    | ENSOARG00000012249 | 5S_rRNA     | 17113331 | 17243756 | 24 | ENSOARG00000014813 | IFT22    | 35319511 | 35323830 | 24 |
|                    |          |          |          |    | ENSOARG00000012389 | U6          | 17416805 | 17426893 | 24 | ENSOARG00000015117 |          | 35409415 | 35412574 | 24 |
|                    |          |          |          |    | ENSOARG00000013592 | KPNA7       | 18695046 | 18702323 | 24 | ENSOARG00000015168 |          | 35432755 | 35438155 | 24 |
|                    |          |          |          |    | ENSOARG00000013593 | IL4R        | 34135113 | 34165507 | 24 | ENSOARG00000015233 | AP1S1    | 35472189 | 35475647 | 24 |
|                    |          |          |          |    | ENSOARG00000013650 | IL21R       | 34164879 | 34177170 | 24 | ENSOARG00000015262 | SERPINE1 | 35490295 | 35496243 | 24 |

|                    |             |          |          |    |                    |             |          |          |    |
|--------------------|-------------|----------|----------|----|--------------------|-------------|----------|----------|----|
| ENSOARG00000013722 |             | 34217112 | 34247460 | 24 | ENSOARG00000017218 | PALB2       | 21271399 | 21297440 | 24 |
| ENSOARG00000013748 | U6          | 34256246 | 34257717 | 24 | ENSOARG00000017281 | DCTN5       | 21297798 | 21325007 | 24 |
| ENSOARG00000013879 |             | 18706424 | 18938235 | 24 | ENSOARG00000017631 | PRKCB       | 21669605 | 21883171 | 24 |
| ENSOARG00000014682 | Metazoa_SRP | 19098694 | 19358510 | 24 | ENSOARG00000017677 | CACNG3      | 21924568 | 22022189 | 24 |
| ENSOARG00000014711 |             | 35124398 | 35319320 | 24 | ENSOARG00000017741 | RBBP6       | 22202339 | 22237519 | 24 |
| ENSOARG00000014813 | U6          | 35319511 | 35323830 | 24 | ENSOARG00000017950 | TNRC6A      | 22384968 | 22479794 | 24 |
| ENSOARG00000015094 |             | 19686502 | 19711770 | 24 | ENSOARG00000018306 | ARHGAP17    | 22575927 | 22630268 | 24 |
| ENSOARG00000015117 | 5S_rRNA     | 35409415 | 35412574 | 24 | ENSOARG00000018442 | LCMT1       | 22670317 | 22755114 | 24 |
| ENSOARG00000015150 | U6          | 19712463 | 19726247 | 24 | ENSOARG00000018461 |             | 22672598 | 22676620 | 24 |
| ENSOARG00000015168 | KPNA7       | 35432755 | 35438155 | 24 | ENSOARG00000018497 | TMEM225B    | 36704386 | 36711882 | 24 |
| ENSOARG00000015233 | IL4R        | 35472189 | 35475647 | 24 | ENSOARG00000018512 |             | 36718853 | 36726417 | 24 |
| ENSOARG00000015262 | IL21R       | 35490295 | 35496243 | 24 | ENSOARG00000018518 | ZNF655      | 36733005 | 36743576 | 24 |
| ENSOARG00000015303 |             | 19817449 | 19870913 | 24 | ENSOARG00000018676 |             | 36858253 | 36867852 | 24 |
| ENSOARG00000015554 | U6          | 19838976 | 20025969 | 24 | ENSOARG00000018686 |             | 23284024 | 23287342 | 24 |
| ENSOARG00000016442 |             | 20777411 | 20855050 | 24 | ENSOARG00000018696 | PDAP1       | 36877950 | 36883201 | 24 |
| ENSOARG00000017218 | Metazoa_SRP | 21271399 | 21297440 | 24 | ENSOARG00000018731 | ARPC1B      | 36885477 | 36891494 | 24 |
| ENSOARG00000017281 |             | 21297798 | 21325007 | 24 | ENSOARG00000018797 | NSMCE1      | 24802986 | 24837628 | 24 |
| ENSOARG00000017631 | U6          | 21669605 | 21883171 | 24 | ENSOARG00000018824 | KPNA7       | 36986738 | 37026203 | 24 |
| ENSOARG00000017677 |             | 21924568 | 22022189 | 24 | ENSOARG00000018832 | IL4R        | 24897923 | 24921149 | 24 |
| ENSOARG00000017741 | 5S_rRNA     | 22202339 | 22237519 | 24 | ENSOARG00000018894 | IL21R       | 24987772 | 25002160 | 24 |
| ENSOARG00000018306 | U6          | 22575927 | 22630268 | 24 | ENSOARG00000022049 |             | 23643906 | 23643986 | 24 |
| ENSOARG00000018442 | KPNA7       | 22670317 | 22755114 | 24 | ENSOARG00000022216 | SNORD14     | 30871659 | 30871748 | 24 |
| ENSOARG00000018461 | IL4R        | 22672598 | 22676620 | 24 | ENSOARG00000022333 | U6          | 31075078 | 31075176 | 24 |
| ENSOARG00000018497 | IL21R       | 36704386 | 36711882 | 24 | ENSOARG00000022461 |             | 27711344 | 27711477 | 24 |
| ENSOARG00000018512 |             | 36718853 | 36726417 | 24 | ENSOARG00000022869 | Metazoa_SRP | 36737619 | 36737895 | 24 |
| ENSOARG00000018518 | U6          | 36733005 | 36743576 | 24 | ENSOARG00000023381 |             | 27715209 | 27715348 | 24 |
| ENSOARG00000018676 |             | 36858253 | 36867852 | 24 | ENSOARG00000023493 | U6          | 26483547 | 26483653 | 24 |
| ENSOARG00000018686 | Metazoa_SRP | 23284024 | 23287342 | 24 | ENSOARG00000024511 |             | 26985376 | 26985458 | 24 |
| ENSOARG00000018696 |             | 36877950 | 36883201 | 24 | ENSOARG00000024633 | 5S_rRNA     | 23323009 | 23323126 | 24 |
| ENSOARG00000018709 | U6          | 24665014 | 24665858 | 24 | ENSOARG00000025882 |             | 22192111 | 22201388 | 24 |
| ENSOARG00000018731 |             | 36885477 | 36891494 | 24 | ENSOARG00000025885 |             | 27237144 | 27238017 | 24 |
| ENSOARG00000018797 | 5S_rRNA     | 24802986 | 24837628 | 24 | ENSOARG00000025886 |             | 29309747 | 29489513 | 24 |
| ENSOARG00000018824 | U6          | 36986738 | 37026203 | 24 | ENSOARG00000025887 |             | 29711793 | 29843090 | 24 |
| ENSOARG00000018832 | KPNA7       | 24897923 | 24921149 | 24 | ENSOARG00000025889 |             | 31053456 | 31074351 | 24 |

|                    |             |          |          |    |                    |          |          |    |
|--------------------|-------------|----------|----------|----|--------------------|----------|----------|----|
| ENSOARG00000018894 | IL4R        | 24987772 | 25002160 | 24 | ENSOARG00000025900 | 38964478 | 39079933 | 24 |
| ENSOARG00000022049 | IL21R       | 23643906 | 23643986 | 24 | ENSOARG00000025901 | 39157209 | 39160570 | 24 |
| ENSOARG00000022333 |             | 31075078 | 31075176 | 24 | ENSOARG00000025902 | 40413481 | 40551726 | 24 |
| ENSOARG00000022461 | U6          | 27711344 | 27711477 | 24 | ENSOARG00000025903 | 40462329 | 40463477 | 24 |
| ENSOARG00000022869 |             | 36737619 | 36737895 | 24 |                    |          |          |    |
| ENSOARG00000023381 | Metazoa_SRP | 27715209 | 27715348 | 24 |                    |          |          |    |
| ENSOARG00000023493 |             | 26483547 | 26483653 | 24 |                    |          |          |    |
| ENSOARG00000024511 | U6          | 26985376 | 26985458 | 24 |                    |          |          |    |
| ENSOARG00000024633 |             | 23323009 | 23323126 | 24 |                    |          |          |    |
| ENSOARG00000025076 | 5S_rRNA     | 19850199 | 19850306 | 24 |                    |          |          |    |
| ENSOARG00000025882 | U6          | 22192111 | 22201388 | 24 |                    |          |          |    |
| ENSOARG00000025884 | KPNA7       | 24661530 | 24663614 | 24 |                    |          |          |    |
| ENSOARG00000025885 | IL4R        | 27237144 | 27238017 | 24 |                    |          |          |    |
| ENSOARG00000025886 | IL21R       | 29309747 | 29489513 | 24 |                    |          |          |    |
| ENSOARG00000025887 |             | 29711793 | 29843090 | 24 |                    |          |          |    |
| ENSOARG00000025889 | U6          | 31053456 | 31074351 | 24 |                    |          |          |    |
| ENSOARG00000025900 |             | 38964478 | 39079933 | 24 |                    |          |          |    |
| ENSOARG00000025901 | Metazoa_SRP | 39157209 | 39160570 | 24 |                    |          |          |    |
| ENSOARG00000025902 |             | 40413481 | 40551726 | 24 |                    |          |          |    |
| ENSOARG00000025903 | U6          | 40462329 | 40463477 | 24 |                    |          |          |    |

Supplementary Table S4. Top 1% genes as candidates for selective signals using FLK test on 26 sheep autosomes for: a) IR and IN breeds, b) IR and AF breeds, c) IN and AF breeds.

| <b>a</b>           |           |            |           |          | <b>b</b>           |           |            |           |          | <b>c</b>           |           |            |           |          |
|--------------------|-----------|------------|-----------|----------|--------------------|-----------|------------|-----------|----------|--------------------|-----------|------------|-----------|----------|
| Gene.stable.ID     | Gene.name | Gene.start | Gene.end  | Chr.name | Gene.stable.ID     | Gene.name | Gene.start | Gene.end  | Chr.name | Gene.stable.ID     | Gene.name | Gene.start | Gene.end  | Chr.name |
| ENSOARG00000000342 |           | 101868308  | 101930299 | 1        | ENSOARG00000000578 | CDCA7     | 135465988  | 135478982 | 2        | ENSOARG00000000578 | CDCA7     | 135465988  | 135478982 | 2        |
| ENSOARG00000000418 | PHC3      | 215239784  | 215311459 | 1        | ENSOARG00000001516 | SERINC2   | 235085858  | 235104700 | 2        | ENSOARG00000004384 | RPS6KA1   | 239443298  | 239467559 | 2        |
| ENSOARG00000000493 |           | 18080828   | 18124219  | 1        | ENSOARG00000001603 | FABP3     | 235135457  | 235145925 | 2        | ENSOARG00000005756 | BRINP1    | 4115880    | 4262567   | 2        |
| ENSOARG00000000515 | ST3GAL3   | 18120931   | 18347967  | 1        | ENSOARG00000004384 | RPS6KA1   | 239443298  | 239467559 | 2        | ENSOARG00000005972 | TNFSF15   | 8934595    | 8954674   | 2        |
| ENSOARG00000001069 | GOLIM4    | 217358248  | 217440402 | 1        | ENSOARG00000006009 | WHRN      | 9200709    | 9289247   | 2        | ENSOARG00000006009 | WHRN      | 9200709    | 9289247   | 2        |
| ENSOARG00000005112 | HPS3      | 237051700  | 237092922 | 1        | ENSOARG00000006030 | AKNA      | 9311734    | 9352831   | 2        | ENSOARG00000006030 | AKNA      | 9311734    | 9352831   | 2        |
| ENSOARG00000009108 | KANK4     | 37279376   | 37318481  | 1        | ENSOARG00000006078 | COL27A1   | 9374621    | 9516130   | 2        | ENSOARG00000006078 | COL27A1   | 9374621    | 9516130   | 2        |
| ENSOARG00000009414 | ATP2C1    | 256985186  | 257068039 | 1        | ENSOARG00000006287 | BSPRY     | 10282879   | 10310995  | 2        | ENSOARG00000006287 | BSPRY     | 10282879   | 10310995  | 2        |
| ENSOARG00000009979 |           | 258241417  | 258581681 | 1        | ENSOARG00000006300 | WDR31     | 10332512   | 10346064  | 2        | ENSOARG00000006300 | WDR31     | 10332512   | 10346064  | 2        |
| ENSOARG00000010761 | TMPRSS3   | 260732616  | 260756933 | 1        | ENSOARG00000007628 |           | 22623391   | 22636457  | 2        | ENSOARG00000007440 | GRIN3A    | 21252157   | 21459411  | 2        |
| ENSOARG00000010806 | UBASH3A   | 260769711  | 260809438 | 1        | ENSOARG00000007715 | KDM1A     | 242660932  | 242714290 | 2        | ENSOARG00000008011 | GALNT13   | 153919534  | 154286087 | 2        |
| ENSOARG00000014697 | GPR160    | 215320734  | 215321750 | 1        | ENSOARG00000007814 | SYK       | 25701083   | 25759453  | 2        | ENSOARG00000008084 | WNK2      | 28059615   | 28213657  | 2        |
| ENSOARG00000016027 | USP25     | 139564863  | 139699601 | 1        | ENSOARG00000008084 | WNK2      | 28059615   | 28213657  | 2        | ENSOARG00000008659 | NEB       | 156650358  | 156853665 | 2        |
| ENSOARG00000019409 | SLC6A17   | 86624899   | 86660561  | 1        | ENSOARG00000008659 | NEB       | 156650358  | 156853665 | 2        | ENSOARG00000009898 | GTDC1     | 164635825  | 164985339 | 2        |
| ENSOARG00000020378 | HIVEP3    | 15830095   | 15885701  | 1        | ENSOARG00000009010 | UBQLN1    | 35845653   | 35897664  | 2        | ENSOARG00000010689 | LCT       | 173878863  | 173926998 | 2        |
| ENSOARG00000020761 | TNIK      | 214087639  | 214487796 | 1        | ENSOARG00000010057 | LRP1B     | 167894700  | 168966473 | 2        | ENSOARG00000010706 | UBXN4     | 173931295  | 173953446 | 2        |
| ENSOARG00000021056 |           | 100641877  | 100643585 | 1        | ENSOARG00000010998 | COL15A1   | 48487007   | 48588324  | 2        | ENSOARG00000010998 | COL15A1   | 48487007   | 48588324  | 2        |
| ENSOARG00000021060 | RORC      | 100648111  | 100672007 | 1        | ENSOARG00000011055 | PADI1     | 248168842  | 248189290 | 2        | ENSOARG00000011055 | PADI1     | 248168842  | 248189290 | 2        |
| ENSOARG00000021065 |           | 100680890  | 100831184 | 1        | ENSOARG00000011436 | MGAT5     | 175253426  | 175595136 | 2        | ENSOARG00000011436 | MGAT5     | 175253426  | 175595136 | 2        |
| ENSOARG00000021072 | THEM4     | 100734906  | 100770288 | 1        | ENSOARG00000011504 | ZCCHC7    | 51076086   | 51317595  | 2        | ENSOARG00000012588 | CARNMT1   | 61274631   | 61304613  | 2        |
| ENSOARG00000021983 | U6        | 215303687  | 215303791 | 1        | ENSOARG00000015710 | HERC2     | 112478388  | 112720769 | 2        | ENSOARG00000015637 | LGSN      | 111995915  | 112021524 | 2        |
| ENSOARG00000025511 |           | 17971643   | 18117954  | 1        | ENSOARG00000019232 | ERBB4     | 212081308  | 212484401 | 2        | ENSOARG00000015655 | OCA2      | 112126827  | 112463751 | 2        |
| ENSOARG0000002545  | EPB41     | 237305059  | 237487293 | 2        | ENSOARG00000019758 |           | 215044960  | 215045145 | 2        | ENSOARG00000015710 | HERC2     | 112478388  | 112720769 | 2        |
| ENSOARG0000003546  | ENHO      | 36820768   | 36820998  | 2        | ENSOARG00000020677 |           | 231918490  | 231924826 | 2        | ENSOARG00000016969 |           | 129907617  | 130149171 | 2        |
| ENSOARG00000008634 |           | 31239795   | 31476634  | 2        | ENSOARG00000020868 | AK2       | 233730933  | 233753041 | 2        | ENSOARG00000019232 | ERBB4     | 212081308  | 212484401 | 2        |
| ENSOARG00000008659 | NEB       | 156650358  | 156853665 | 2        | ENSOARG00000024860 | U2        | 151198443  | 151198552 | 2        | ENSOARG00000019731 |           | 195160444  | 195160662 | 2        |
| ENSOARG00000008930 | RIF1      | 156861839  | 156919308 | 2        | ENSOARG00000025847 |           | 215173693  | 215317344 | 2        | ENSOARG00000019758 |           | 215044960  | 215045145 | 2        |
| ENSOARG00000009251 | DNAI1     | 36819526   | 36890350  | 2        | ENSOARG0000002894  | RTN4      | 68869891   | 68943954  | 3        | ENSOARG00000020437 | DOCK10    | 225910579  | 226106181 | 2        |

|                     |         |           |           |   |                    |         |           |           |   |                    |          |           |           |   |
|---------------------|---------|-----------|-----------|---|--------------------|---------|-----------|-----------|---|--------------------|----------|-----------|-----------|---|
| ENSOARG00000010960  | ALG2    | 48313731  | 48317508  | 2 | ENSOARG00000004226 | NRXN1   | 73678833  | 73847033  | 3 | ENSOARG00000024949 | U6       | 201028585 | 201028685 | 2 |
| ENSOARG00000011436  | MGAT5   | 175253426 | 175595136 | 2 | ENSOARG00000007419 | ABL1    | 5731767   | 5765473   | 3 | ENSOARG00000002894 | RTN4     | 68869891  | 68943954  | 3 |
| ENSOARG00000012027  |         | 52695717  | 52765806  | 2 | ENSOARG00000008162 | MAP4K3  | 84680681  | 84866029  | 3 | ENSOARG00000004226 | NRXN1    | 73678833  | 73847033  | 3 |
| ENSOARG00000014195  | TMEFF2  | 193228532 | 193510876 | 2 | ENSOARG00000008165 | HSD17B6 | 162593753 | 162604684 | 3 | ENSOARG00000008165 | HSD17B6  | 162593753 | 162604684 | 3 |
| ENSOARG00000014477  |         | 91933439  | 91934623  | 2 | ENSOARG00000009069 | ATL2    | 85684525  | 85751972  | 3 | ENSOARG00000009069 | ATL2     | 85684525  | 85751972  | 3 |
| ENSOARG00000015036  | HMBX1   | 102231442 | 102383638 | 2 | ENSOARG00000010376 |         | 91050821  | 91234495  | 3 | ENSOARG00000009740 | EIF2AK2  | 86846562  | 86871162  | 3 |
| ENSOARG00000016867  | ITGA4   | 127163497 | 127254486 | 2 | ENSOARG00000011771 | TESPA1  | 164960462 | 164984444 | 3 | ENSOARG00000009846 | GPATCH11 | 86879693  | 86887627  | 3 |
| ENSOARG00000017979  | NBEAL1  | 204016478 | 204166655 | 2 | ENSOARG00000012960 | DCP1B   | 212314512 | 212358765 | 3 | ENSOARG00000009946 | HEATR5B  | 86893694  | 86992123  | 3 |
| ENSOARG00000018104  |         | 204046005 | 204047405 | 2 | ENSOARG00000013022 | TMEM182 | 98927197  | 98974919  | 3 | ENSOARG00000012360 | ELK3     | 165522205 | 165579438 | 3 |
| ENSOARG00000022859  | U6      | 91862325  | 91862426  | 2 | ENSOARG00000013033 | MFS9    | 98995237  | 99007482  | 3 | ENSOARG00000012449 | CDK17    | 165586544 | 165627612 | 3 |
| ENSOARG00000024062  | 5S_rRNA | 91845862  | 91845980  | 2 | ENSOARG00000014173 | ANO4    | 169622065 | 170061610 | 3 | ENSOARG00000012960 | DCP1B    | 212314512 | 212358765 | 3 |
| ENSOARG00000024578  | U6      | 193361627 | 193361713 | 2 | ENSOARG00000014722 | UTP20   | 170228637 | 170315908 | 3 | ENSOARG00000014173 | ANO4     | 169622065 | 170061610 | 3 |
| ENSOARG00000025733  |         | 954711    | 1233648   | 2 | ENSOARG00000015343 | GNPTAB  | 170615182 | 170667987 | 3 | ENSOARG00000014722 | UTP20    | 170228637 | 170315908 | 3 |
| ENSOARG00000025798  |         | 114046190 | 114223286 | 2 | ENSOARG00000017302 | HS1BP3  | 28343752  | 28391519  | 3 | ENSOARG00000015054 | PPP1R12A | 115651729 | 115819054 | 3 |
| ENSOARG00000025800  |         | 115725037 | 115837201 | 2 | ENSOARG00000017314 | GALNT6  | 134693949 | 134722893 | 3 | ENSOARG00000016632 |          | 108814590 | 108815243 | 3 |
| ENSOARG00000025826  |         | 170648415 | 170650818 | 2 | ENSOARG00000017366 | LDAH    | 28411571  | 28500725  | 3 | ENSOARG00000017381 | POU6F1   | 134849158 | 134869705 | 3 |
| ENSOARG00000001759  | FANCL   | 65770635  | 65858634  | 3 | ENSOARG00000018354 |         | 32668067  | 32874601  | 3 | ENSOARG00000018354 |          | 32668067  | 32874601  | 3 |
| ENSOARG00000001844  | VRK2    | 65858703  | 65955917  | 3 | ENSOARG00000019050 | NCF4    | 180081443 | 180103379 | 3 | ENSOARG00000019050 | NCF4     | 180081443 | 180103379 | 3 |
| ENSOARG00000002277  |         | 1442982   | 2818577   | 3 | ENSOARG00000019068 |         | 180109028 | 180109544 | 3 | ENSOARG00000019068 |          | 180109028 | 180109544 | 3 |
| ENSOARG00000002366  | RXRA    | 1694451   | 1718246   | 3 | ENSOARG00000019095 | CSF2RB  | 180166727 | 180179868 | 3 | ENSOARG00000019095 | CSF2RB   | 180166727 | 180179868 | 3 |
| ENSOARG000000011846 | NTN4    | 165067364 | 165195408 | 3 | ENSOARG00000019458 | BABAM2  | 34767758  | 35168619  | 3 | ENSOARG00000019288 | ASB8     | 138198426 | 138235446 | 3 |
| ENSOARG00000014589  | ZFC3H1  | 107556327 | 107605339 | 3 | ENSOARG00000019471 |         | 34958690  | 34959330  | 3 | ENSOARG00000019300 | PFKM     | 138238132 | 138280543 | 3 |
| ENSOARG00000014616  | THAP2   | 107606256 | 107618590 | 3 | ENSOARG00000019564 | TMTC1   | 184510212 | 184836655 | 3 | ENSOARG00000019458 | BABAM2   | 34767758  | 35168619  | 3 |
| ENSOARG00000015027  | SYT1    | 114906496 | 115404501 | 3 | ENSOARG00000019999 | KRAS    | 189578775 | 189614533 | 3 | ENSOARG00000019471 |          | 34958690  | 34959330  | 3 |
| ENSOARG00000015359  | LRRIQ1  | 121148785 | 121363705 | 3 | ENSOARG00000020479 | RETSAT  | 57047396  | 57061814  | 3 | ENSOARG00000019578 | ANO6     | 140942833 | 141115777 | 3 |
| ENSOARG00000015702  | EPYC    | 127257338 | 127295253 | 3 | ENSOARG00000020493 | ELMOD3  | 57065579  | 57095703  | 3 | ENSOARG00000019622 | NELL2    | 141536582 | 141928837 | 3 |
| ENSOARG00000016814  | TXNRD1  | 172982661 | 173042110 | 3 | ENSOARG00000024456 |         | 122925167 | 122925225 | 3 | ENSOARG00000019909 | ITPR2    | 187771324 | 188372241 | 3 |
| ENSOARG00000017296  | NUAK1   | 174550166 | 174621290 | 3 | ENSOARG00000025992 |         | 84593692  | 84680075  | 3 | ENSOARG00000019970 | LRRK2    | 146551630 | 146764634 | 3 |
| ENSOARG00000017344  | BIN2    | 134750526 | 134787072 | 3 | ENSOARG00000025993 |         | 84646174  | 84681092  | 3 | ENSOARG00000019999 | KRAS     | 189578775 | 189614533 | 3 |
| ENSOARG00000017381  | POU6F1  | 134849158 | 134869705 | 3 | ENSOARG00000026024 |         | 131632147 | 131632909 | 3 | ENSOARG00000020366 | PYROXD1  | 193503056 | 193528097 | 3 |
| ENSOARG00000018287  |         | 164406274 | 164407230 | 3 | ENSOARG00000001140 |         | 112262485 | 112438114 | 4 | ENSOARG00000020479 | RETSAT   | 57047396  | 57061814  | 3 |
| ENSOARG00000018639  | MB      | 178866680 | 178877963 | 3 | ENSOARG00000001288 |         | 112314512 | 112321148 | 4 | ENSOARG00000020493 | ELMOD3   | 57065579  | 57095703  | 3 |
| ENSOARG00000019288  | ASB8    | 138198426 | 138235446 | 3 | ENSOARG00000002931 | DOCK4   | 56152727  | 56624017  | 4 | ENSOARG00000021286 |          | 96586892  | 96586962  | 3 |

|                    |          |           |           |   |                    |          |           |           |   |                    |         |           |           |   |
|--------------------|----------|-----------|-----------|---|--------------------|----------|-----------|-----------|---|--------------------|---------|-----------|-----------|---|
| ENSOARG00000019300 | PFKM     | 138238132 | 138280543 | 3 | ENSOARG00000006085 |          | 95239604  | 95287750  | 4 | ENSOARG00000022504 | 5S_rRNA | 118496957 | 118497076 | 3 |
| ENSOARG00000019311 | SENP1    | 138282207 | 138331370 | 3 | ENSOARG00000006163 | BBS9     | 63241800  | 63694790  | 4 | ENSOARG00000026012 |         | 108802884 | 108807540 | 3 |
| ENSOARG00000019578 | ANO6     | 140942833 | 141115777 | 3 | ENSOARG00000006427 | PLXNA4   | 95788312  | 96204055  | 4 | ENSOARG00000002931 | DOCK4   | 56152727  | 56624017  | 4 |
| ENSOARG00000019622 | NELL2    | 141536582 | 141928837 | 3 | ENSOARG00000006901 | THSD7A   | 19499637  | 19777463  | 4 | ENSOARG00000004500 | NAMPT   | 47349250  | 47389103  | 4 |
| ENSOARG00000019623 | ERGIC2   | 184954799 | 184996084 | 3 | ENSOARG00000007611 |          | 118351579 | 118355387 | 4 | ENSOARG00000005193 | KMT2C   | 113983981 | 114146610 | 4 |
| ENSOARG00000019717 | ADAMTS20 | 142961377 | 143166195 | 3 | ENSOARG00000007716 | BPGM     | 98301817  | 98320855  | 4 | ENSOARG00000006427 | PLXNA4  | 95788312  | 96204055  | 4 |
| ENSOARG00000019994 |          | 43016611  | 43018465  | 3 | ENSOARG00000008903 |          | 66590322  | 66929661  | 4 | ENSOARG00000008198 | AGMO    | 23650918  | 24047746  | 4 |
| ENSOARG00000020390 | SLCO1A2  | 193610779 | 193663029 | 3 | ENSOARG00000010179 | TRIM24   | 101941199 | 102051242 | 4 | ENSOARG00000009641 | HDAC9   | 27257256  | 27548397  | 4 |
| ENSOARG00000020420 |          | 193676598 | 193750422 | 3 | ENSOARG00000013517 |          | 3629296   | 3769877   | 4 | ENSOARG00000009803 | TWISTNB | 28448451  | 28458663  | 4 |
| ENSOARG00000020802 | GRIN2B   | 200689548 | 201197462 | 3 | ENSOARG00000014903 | GRM3     | 33520799  | 33628582  | 4 | ENSOARG00000010179 | TRIM24  | 101941199 | 102051242 | 4 |
| ENSOARG00000023666 |          | 115367304 | 115367384 | 3 | ENSOARG00000017240 | HECW1    | 77592533  | 77851748  | 4 | ENSOARG00000013517 |         | 3629296   | 3769877   | 4 |
| ENSOARG00000024362 |          | 200823076 | 200823162 | 3 | ENSOARG00000017420 | GLI3     | 79029288  | 79131016  | 4 | ENSOARG00000014903 | GRM3    | 33520799  | 33628582  | 4 |
| ENSOARG00000025936 |          | 1690528   | 1699560   | 3 | ENSOARG00000017524 | MAGI2    | 42637311  | 43299968  | 4 | ENSOARG00000016384 | CDK14   | 7873876   | 8511553   | 4 |
| ENSOARG00000026040 |          | 174577386 | 174723159 | 3 | ENSOARG00000018237 | TCAF1    | 106458935 | 106491976 | 4 | ENSOARG00000016532 |         | 8367514   | 8371580   | 4 |
| ENSOARG0000002000  | BMT2     | 55507741  | 55584574  | 4 | ENSOARG00000022797 | U6       | 63293600  | 63293706  | 4 | ENSOARG00000017240 | HECW1   | 77592533  | 77851748  | 4 |
| ENSOARG00000007177 | SLC35B4  | 97934780  | 97969641  | 4 | ENSOARG00000023737 |          | 33541345  | 33541430  | 4 | ENSOARG00000017420 | GLI3    | 79029288  | 79131016  | 4 |
| ENSOARG00000014574 | DMTF1    | 33148768  | 33195015  | 4 | ENSOARG00000025211 |          | 3683214   | 3745148   | 4 | ENSOARG00000023737 |         | 33541345  | 33541430  | 4 |
| ENSOARG00000018572 | CDK6     | 9837145   | 10086661  | 4 | ENSOARG00000001932 | COMMD10  | 35086709  | 35265384  | 5 | ENSOARG00000025211 |         | 3683214   | 3745148   | 4 |
| ENSOARG00000002870 | GPRIN1   | 35553311  | 35556147  | 5 | ENSOARG00000001949 | ARHGAP26 | 51190660  | 51671936  | 5 | ENSOARG00000025233 |         | 47308313  | 47330698  | 4 |
| ENSOARG00000002915 | SNCB     | 35574853  | 35582184  | 5 | ENSOARG00000003045 | SNAPC2   | 14355089  | 14357459  | 5 | ENSOARG00000003045 | SNAPC2  | 14355089  | 14357459  | 5 |
| ENSOARG00000012188 | CACTIN   | 17872074  | 17883373  | 5 | ENSOARG00000003105 | TIMM44   | 14359615  | 14371424  | 5 | ENSOARG00000003105 | TIMM44  | 14359615  | 14371424  | 5 |
| ENSOARG00000012274 | TBXA2R   | 17893368  | 17899126  | 5 | ENSOARG00000012373 | ADAM19   | 66427663  | 66518705  | 5 | ENSOARG00000003640 | BRD4    | 7579941   | 7664534   | 5 |
| ENSOARG00000012310 | GIPC3    | 17903084  | 17906791  | 5 | ENSOARG00000013615 | FSTL4    | 42210002  | 42682576  | 5 | ENSOARG00000003767 | EPHX3   | 7669684   | 7673094   | 5 |
| ENSOARG00000012318 | HMG20B   | 17910323  | 17915929  | 5 | ENSOARG00000014723 | CXCL14   | 44436779  | 44440881  | 5 | ENSOARG00000008239 | ZNF692  | 40088840  | 40096447  | 5 |
| ENSOARG00000014004 | PCDHB15  | 49709852  | 49712155  | 5 | ENSOARG00000015800 | ZGLP1    | 12524327  | 12527107  | 5 | ENSOARG00000015794 | NME5    | 46938902  | 46961998  | 5 |
| ENSOARG00000016317 |          | 47131601  | 47133514  | 5 | ENSOARG00000015848 |          | 12527749  | 12531743  | 5 | ENSOARG00000015800 | ZGLP1   | 12524327  | 12527107  | 5 |
| ENSOARG00000016394 | KDM3B    | 47153096  | 47208649  | 5 | ENSOARG00000015886 |          | 12533217  | 12546433  | 5 | ENSOARG00000015840 | BRD8    | 46972869  | 46993265  | 5 |
| ENSOARG00000016418 |          | 20379609  | 20597764  | 5 | ENSOARG00000015922 | ICAM3    | 12546272  | 12554248  | 5 | ENSOARG00000015848 |         | 12527749  | 12531743  | 5 |
| ENSOARG00000017521 | HBEGF    | 48917000  | 48951593  | 5 | ENSOARG00000016012 | TYK2     | 12563749  | 12590812  | 5 | ENSOARG00000015886 |         | 12533217  | 12546433  | 5 |
| ENSOARG00000018844 | PCDHB14  | 49694520  | 49706894  | 5 | ENSOARG00000016463 |          | 14358880  | 14359035  | 5 | ENSOARG00000015922 | ICAM3   | 12546272  | 12554248  | 5 |
| ENSOARG00000018880 | MAN2A1   | 105984860 | 106179347 | 5 | ENSOARG00000016808 |          | 38445338  | 38446264  | 5 | ENSOARG00000016012 | TYK2    | 12563749  | 12590812  | 5 |
| ENSOARG00000018924 | TMEM232  | 106642215 | 106911809 | 5 | ENSOARG00000017454 | SMARCA4  | 13107775  | 13181922  | 5 | ENSOARG00000016463 |         | 14358880  | 14359035  | 5 |
| ENSOARG00000025296 |          | 17857816  | 17992134  | 5 | ENSOARG00000018880 | MAN2A1   | 105984860 | 106179347 | 5 | ENSOARG00000016502 | ADGRV1  | 87500637  | 88022830  | 5 |



|                    |         |           |           |    |                    |          |           |           |   |                    |          |           |           |   |
|--------------------|---------|-----------|-----------|----|--------------------|----------|-----------|-----------|---|--------------------|----------|-----------|-----------|---|
| ENSOARG0000000537  | ANK2    | 12362227  | 12719843  | 6  | ENSOARG00000023388 |          | 13107882  | 13107939  | 5 | ENSOARG00000016808 |          | 38445338  | 38446264  | 5 |
| ENSOARG0000003887  | MAPK10  | 100456410 | 100650949 | 6  | ENSOARG00000024361 | U6       | 51461892  | 51461998  | 5 | ENSOARG00000017050 | SLC27A6  | 22582095  | 22657624  | 5 |
| ENSOARG00000005149 | KCNIP4  | 40156628  | 40399467  | 6  | ENSOARG00000005149 | KCNIP4   | 40156628  | 40399467  | 6 | ENSOARG00000018142 | LMNB1    | 24625371  | 24679085  | 5 |
| ENSOARG00000007185 | STK32B  | 103332684 | 103713145 | 6  | ENSOARG00000006066 | JAKMIP1  | 102735767 | 102808907 | 6 | ENSOARG00000023036 |          | 22620569  | 22620661  | 5 |
| ENSOARG00000010430 | PPA2    | 19864955  | 19945670  | 6  | ENSOARG00000007030 | EVC2     | 103130193 | 103289328 | 6 | ENSOARG00000006066 | JAKMIP1  | 102735767 | 102808907 | 6 |
| ENSOARG00000010632 | TET2    | 20055989  | 20147275  | 6  | ENSOARG00000007954 | FGFBP1   | 110587924 | 110588628 | 6 | ENSOARG00000007030 | EVC2     | 103130193 | 103289328 | 6 |
| ENSOARG00000013238 | SLC39A8 | 22554766  | 22635293  | 6  | ENSOARG00000009750 | NPNT     | 19341096  | 19415842  | 6 | ENSOARG00000007954 | FGFBP1   | 110587924 | 110588628 | 6 |
| ENSOARG00000018214 | CWH43   | 67594632  | 67647488  | 6  | ENSOARG00000010430 | PPA2     | 19864955  | 19945670  | 6 | ENSOARG00000009491 | DTHD1    | 55697169  | 55784117  | 6 |
| ENSOARG00000025038 | U6      | 19846738  | 19846844  | 6  | ENSOARG00000012378 | SLC4A4   | 86143053  | 86457688  | 6 | ENSOARG00000009750 | NPNT     | 19341096  | 19415842  | 6 |
| ENSOARG00000003122 | SPATA7  | 96996666  | 97038856  | 7  | ENSOARG00000013955 | H2AZ1    | 24826878  | 24828144  | 6 | ENSOARG00000010172 | INTS12   | 19612772  | 19634942  | 6 |
| ENSOARG00000003198 |         | 97148925  | 97186147  | 7  | ENSOARG00000014034 | DNAJB14  | 24829721  | 24873057  | 6 | ENSOARG00000010289 | ARHGEF38 | 19650992  | 19793944  | 6 |
| ENSOARG00000003285 | EML5    | 97190353  | 97312451  | 7  | ENSOARG00000014880 | MTHFD2L  | 88783856  | 88905590  | 6 | ENSOARG00000010430 | PPA2     | 19864955  | 19945670  | 6 |
| ENSOARG00000003343 | TTC8    | 97364708  | 97423931  | 7  | ENSOARG00000014945 | EPGN     | 88912478  | 88918744  | 6 | ENSOARG00000010632 | TET2     | 20055989  | 20147275  | 6 |
| ENSOARG00000016888 | IQGAP2  | 7424541   | 7731473   | 7  | ENSOARG00000023897 |          | 97042557  | 97042639  | 6 | ENSOARG00000012378 | SLC4A4   | 86143053  | 86457688  | 6 |
| ENSOARG00000016918 | F2RL2   | 7644832   | 7650996   | 7  | ENSOARG00000003285 | EML5     | 97190353  | 97312451  | 7 | ENSOARG00000014436 | C4orf54  | 25056613  | 25070887  | 6 |
| ENSOARG00000020851 |         | 48514282  | 48670343  | 7  | ENSOARG00000016161 | EPB41L4A | 1256282   | 1531717   | 7 | ENSOARG00000014880 | MTHFD2L  | 88783856  | 88905590  | 6 |
| ENSOARG00000020856 | LIPC    | 48680866  | 48853721  | 7  | ENSOARG00000018537 |          | 15365981  | 15366591  | 7 | ENSOARG00000014945 | EPGN     | 88912478  | 88918744  | 6 |
| ENSOARG00000021121 | RTN1    | 68766907  | 68890740  | 7  | ENSOARG00000018551 |          | 15384728  | 15392155  | 7 | ENSOARG00000021631 |          | 19642785  | 19642861  | 6 |
| ENSOARG00000021126 | PPM1A   | 69387661  | 69436582  | 7  | ENSOARG00000020717 |          | 42326861  | 42347419  | 7 | ENSOARG00000023897 |          | 97042557  | 97042639  | 6 |
| ENSOARG00000022845 | U6      | 63342906  | 63343012  | 7  | ENSOARG00000020730 | OAZ2     | 42465465  | 42468293  | 7 | ENSOARG00000003285 | EML5     | 97190353  | 97312451  | 7 |
| ENSOARG00000023068 | 5S_rRNA | 48817640  | 48817752  | 7  | ENSOARG00000020735 | ZNF609   | 42475435  | 42642760  | 7 | ENSOARG00000016161 | EPB41L4A | 1256282   | 1531717   | 7 |
| ENSOARG00000023637 |         | 97026422  | 97026507  | 7  | ENSOARG00000020996 | ATP8B4   | 57145756  | 57436036  | 7 | ENSOARG00000017673 | PTGER2   | 11588936  | 11600675  | 7 |
| ENSOARG00000000096 | BCLAF1  | 61293172  | 61313162  | 8  | ENSOARG00000021121 | RTN1     | 68766907  | 68890740  | 7 | ENSOARG00000020717 |          | 42326861  | 42347419  | 7 |
| ENSOARG00000001332 | VTA1    | 66565201  | 66637042  | 8  | ENSOARG00000021191 | SLC8A3   | 78697982  | 78837399  | 7 | ENSOARG00000020893 | PRTG     | 51635068  | 51773448  | 7 |
| ENSOARG00000002348 | STXBP5  | 71462635  | 71627320  | 8  | ENSOARG00000026710 |          | 57124667  | 57275633  | 7 | ENSOARG00000026728 |          | 94660539  | 94753362  | 7 |
| ENSOARG00000004773 | AGPAT4  | 83449093  | 83583173  | 8  | ENSOARG00000001332 | VTA1     | 66565201  | 66637042  | 8 | ENSOARG00000004895 | RPS6KA2  | 88034242  | 88188079  | 8 |
| ENSOARG00000007878 | NCOA7   | 12446609  | 12579375  | 8  | ENSOARG00000006899 | PHIP     | 5690526   | 5800596   | 8 | ENSOARG00000006410 | COL12A1  | 1763844   | 1881188   | 8 |
| ENSOARG00000007915 | HEY2    | 12637522  | 12647466  | 8  | ENSOARG00000008929 | RFX6     | 20778551  | 20830642  | 8 | ENSOARG00000008929 | RFX6     | 20778551  | 20830642  | 8 |
| ENSOARG00000014082 | ENPP3   | 56800675  | 56891139  | 8  | ENSOARG00000009159 |          | 21064326  | 21097808  | 8 | ENSOARG00000009159 |          | 21064326  | 21097808  | 8 |
| ENSOARG00000027033 |         | 55303220  | 55340228  | 8  | ENSOARG00000009927 |          | 26540854  | 26560164  | 8 | ENSOARG00000009927 |          | 26540854  | 26560164  | 8 |
| ENSOARG00000004022 | TRAPPC9 | 16049980  | 16369216  | 9  | ENSOARG00000009968 | CDK19    | 26592432  | 26760228  | 8 | ENSOARG00000009968 | CDK19    | 26592432  | 26760228  | 8 |
| ENSOARG00000015885 | TOX     | 37775458  | 38082193  | 9  | ENSOARG00000012246 |          | 44791678  | 45077954  | 8 | ENSOARG00000011229 |          | 30886393  | 30887168  | 8 |
| ENSOARG00000026520 |         | 37917875  | 38082193  | 9  | ENSOARG00000012911 | RNGTT    | 48260082  | 48482195  | 8 | ENSOARG00000012911 | RNGTT    | 48260082  | 48482195  | 8 |
| ENSOARG00000000109 | SLAIN1  | 53317825  | 53368551  | 10 | ENSOARG00000020008 |          | 50458092  | 50458520  | 8 | ENSOARG00000022716 | U6       | 26579000  | 26579106  | 8 |

|                    |         |          |          |    |                    |          |          |          |    |                    |          |          |          |    |
|--------------------|---------|----------|----------|----|--------------------|----------|----------|----------|----|--------------------|----------|----------|----------|----|
| ENSOARG0000008448  | CAB39L  | 19236825 | 19286656 | 10 | ENSOARG00000022716 | U6       | 26579000 | 26579106 | 8  | ENSOARG00000027019 |          | 44471402 | 44496409 | 8  |
| ENSOARG0000009964  | TRPC4   | 24289442 | 24435384 | 10 | ENSOARG00000027025 |          | 48627836 | 48706773 | 8  | ENSOARG00000027025 |          | 48627836 | 48706773 | 8  |
| ENSOARG00000010770 | STARD13 | 28217820 | 28275644 | 10 | ENSOARG00000027042 |          | 72778000 | 72795072 | 8  | ENSOARG00000009412 | FER1L6   | 28725879 | 28908736 | 9  |
| ENSOARG00000015513 | KLF12   | 48967445 | 49491521 | 10 | ENSOARG00000009003 | TRIQK    | 83920585 | 84012541 | 9  | ENSOARG00000009876 | ANXA13   | 29008574 | 29052918 | 9  |
| ENSOARG00000021607 |         | 19866186 | 19866516 | 10 | ENSOARG00000009876 | ANXA13   | 29008574 | 29052918 | 9  | ENSOARG00000010674 | EIF3H    | 60424730 | 60523273 | 9  |
| ENSOARG00000022692 | 7SK     | 53295513 | 53295829 | 10 | ENSOARG00000010674 | EIF3H    | 60424730 | 60523273 | 9  | ENSOARG00000011267 | CSMD3    | 63608850 | 65007715 | 9  |
| ENSOARG00000024113 | 5S_rRNA | 19303884 | 19304000 | 10 | ENSOARG00000011340 | MMP16    | 86978756 | 87360859 | 9  | ENSOARG00000014889 |          | 36111034 | 36112627 | 9  |
| ENSOARG00000001617 | MYH10   | 27625138 | 27747562 | 11 | ENSOARG00000014778 | LYN      | 36031532 | 36077272 | 9  | ENSOARG00000020180 |          | 36132430 | 36133062 | 9  |
| ENSOARG00000003275 | WFIKKN2 | 35444765 | 35453108 | 11 | ENSOARG00000014889 |          | 36111034 | 36112627 | 9  | ENSOARG00000021574 | U1       | 36126742 | 36126906 | 9  |
| ENSOARG00000004112 | TRAF4   | 19788399 | 19794104 | 11 | ENSOARG00000020180 |          | 36132430 | 36133062 | 9  | ENSOARG00000023724 | SNORD54  | 36111884 | 36111950 | 9  |
| ENSOARG00000004162 | FAM222B | 19799477 | 19808342 | 11 | ENSOARG00000021574 | U1       | 36126742 | 36126906 | 9  | ENSOARG00000026514 |          | 27103578 | 27106919 | 9  |
| ENSOARG00000004170 |         | 23663655 | 23664599 | 11 | ENSOARG00000023724 | SNORD54  | 36111884 | 36111950 | 9  | ENSOARG00000000618 | DCT      | 69452806 | 69492878 | 10 |
| ENSOARG00000004204 |         | 23761925 | 23762614 | 11 | ENSOARG00000026514 |          | 27103578 | 27106919 | 9  | ENSOARG00000000718 | TGDS     | 69480374 | 69590150 | 10 |
| ENSOARG00000004221 |         | 23776332 | 23777273 | 11 | ENSOARG00000000372 | RBM26    | 54918357 | 54994260 | 10 | ENSOARG00000006244 | TDRD3    | 1835291  | 2065511  | 10 |
| ENSOARG00000005519 | PIPOX   | 20029543 | 20041627 | 11 | ENSOARG00000000618 | DCT      | 69452806 | 69492878 | 10 | ENSOARG00000006641 |          | 7450054  | 7547626  | 10 |
| ENSOARG00000011855 |         | 45762020 | 45802167 | 11 | ENSOARG00000000718 | TGDS     | 69480374 | 69590150 | 10 | ENSOARG00000008395 | DCUN1D2  | 85997258 | 86013384 | 10 |
| ENSOARG00000012131 | IKZF3   | 39697587 | 39784473 | 11 | ENSOARG00000006515 | COL4A2   | 84344246 | 84506524 | 10 | ENSOARG00000008433 | TMCO3    | 86021273 | 86037791 | 10 |
| ENSOARG00000014197 |         | 47626004 | 47629928 | 11 | ENSOARG00000006641 |          | 7450054  | 7547626  | 10 | ENSOARG00000008441 | TFDP1    | 86049251 | 86064887 | 10 |
| ENSOARG00000014212 |         | 47641431 | 47645553 | 11 | ENSOARG00000008395 | DCUN1D2  | 85997258 | 86013384 | 10 | ENSOARG00000002872 | MBTD1    | 35042066 | 35112724 | 11 |
| ENSOARG00000014652 | TNS4    | 40276427 | 40294223 | 11 | ENSOARG00000008433 | TMCO3    | 86021273 | 86037791 | 10 | ENSOARG00000004029 |          | 21248088 | 21248303 | 11 |
| ENSOARG00000015860 |         | 18748955 | 18836988 | 11 | ENSOARG00000008441 | TFDP1    | 86049251 | 86064887 | 10 | ENSOARG00000007435 | PRPSAP1  | 54397258 | 54419080 | 11 |
| ENSOARG00000016186 |         | 18969861 | 18988041 | 11 | ENSOARG00000001819 | KIAA0100 | 19685646 | 19712677 | 11 | ENSOARG00000007848 |          | 7641415  | 8038744  | 11 |
| ENSOARG00000016763 |         | 23686551 | 23829312 | 11 | ENSOARG00000002429 | SDF2     | 19713756 | 19724240 | 11 | ENSOARG00000007910 |          | 7997170  | 7998371  | 11 |
| ENSOARG00000022595 | U1      | 45765834 | 45765989 | 11 | ENSOARG00000002727 | SUPT6H   | 19732556 | 19754769 | 11 | ENSOARG00000008340 | TBX21    | 38271542 | 38282106 | 11 |
| ENSOARG00000023268 | 5S_rRNA | 19809497 | 19809594 | 11 | ENSOARG00000005673 | TK1      | 52963145 | 52975382 | 11 | ENSOARG00000008406 | TBKBP1   | 38304081 | 38318431 | 11 |
| ENSOARG00000023893 |         | 27736355 | 27736449 | 11 | ENSOARG00000005753 |          | 52977906 | 52978917 | 11 | ENSOARG00000009006 | NSRP1    | 20719581 | 20905075 | 11 |
| ENSOARG00000024896 | Y_RNA   | 23775149 | 23775252 | 11 | ENSOARG00000005846 | TMC8     | 53004485 | 53012803 | 11 | ENSOARG00000009283 |          | 20761413 | 20766654 | 11 |
| ENSOARG00000026354 |         | 18613777 | 18618841 | 11 | ENSOARG00000006979 | RHBDF2   | 54270255 | 54278688 | 11 | ENSOARG00000009452 | EFCAB5   | 20769784 | 20856633 | 11 |
| ENSOARG00000026373 |         | 40159758 | 40312440 | 11 | ENSOARG00000007435 | PRPSAP1  | 54397258 | 54419080 | 11 | ENSOARG00000010985 | TRARG1   | 21229125 | 21240170 | 11 |
| ENSOARG00000013714 | CD34    | 73589869 | 73605431 | 12 | ENSOARG00000007848 |          | 7641415  | 8038744  | 11 | ENSOARG00000017855 | CHD3     | 27132435 | 27152030 | 11 |
| ENSOARG00000013891 |         | 73700588 | 73737242 | 12 | ENSOARG00000007910 |          | 7997170  | 7998371  | 11 | ENSOARG00000022732 | SCARNA21 | 27146908 | 27147047 | 11 |
| ENSOARG00000025427 |         | 9383068  | 9394916  | 12 | ENSOARG00000008340 | TBX21    | 38271542 | 38282106 | 11 | ENSOARG00000003648 | CCNL2    | 49206920 | 49216787 | 12 |
| ENSOARG00000025469 |         | 75594465 | 75601647 | 12 | ENSOARG00000008406 | TBKBP1   | 38304081 | 38318431 | 11 | ENSOARG00000003838 | AURKAIP1 | 49217180 | 49222771 | 12 |

|                    |         |          |          |    |                    |               |          |          |    |                    |          |          |          |    |
|--------------------|---------|----------|----------|----|--------------------|---------------|----------|----------|----|--------------------|----------|----------|----------|----|
| ENSOARG0000002139  | TLL9    | 60717466 | 60772689 | 13 | ENSOARG00000009006 | NSRP1         | 20719581 | 20905075 | 11 | ENSOARG00000003922 | MXRA8    | 49244103 | 49247665 | 12 |
| ENSOARG0000002249  | ADAM33  | 50839347 | 50852297 | 13 | ENSOARG00000009283 |               | 20761413 | 20766654 | 11 | ENSOARG00000004655 | KIF26B   | 29798435 | 30115631 | 12 |
| ENSOARG0000002391  | MSRB2   | 23184943 | 23206285 | 13 | ENSOARG00000009452 | EFCAB5        | 20769784 | 20856633 | 11 | ENSOARG00000005151 | HMCN1    | 64798855 | 65337057 | 12 |
| ENSOARG0000002416  | PDRG1   | 60775487 | 60781584 | 13 | ENSOARG00000026386 |               | 52845989 | 52980516 | 11 | ENSOARG00000005190 | ACTRT2   | 48089727 | 48090860 | 12 |
| ENSOARG0000002457  |         | 50858086 | 50858543 | 13 | ENSOARG00000026389 |               | 54096210 | 54271589 | 11 | ENSOARG00000012654 | RAB3GAP2 | 21760318 | 21865369 | 12 |
| ENSOARG0000002481  | XKR7    | 60797386 | 60822789 | 13 | ENSOARG00000026390 |               | 54225864 | 54263405 | 11 | ENSOARG00000013652 | VAMP4    | 37302039 | 37323489 | 12 |
| ENSOARG0000002564  |         | 60835911 | 60855548 | 13 | ENSOARG00000002070 | RGL1          | 62892208 | 63060293 | 12 | ENSOARG00000014645 | TNFSF18  | 38815643 | 38823860 | 12 |
| ENSOARG0000002627  | ATRN    | 50871319 | 51003428 | 13 | ENSOARG00000002600 | C1orf21       | 63602428 | 63754041 | 12 | ENSOARG00000015833 | TP73     | 47455866 | 47502821 | 12 |
| ENSOARG0000002820  | HCK     | 60874932 | 60921921 | 13 | ENSOARG00000004302 | C1orf74       | 71659955 | 71660764 | 12 | ENSOARG00000022872 | 5S_rRNA  | 37974675 | 37974795 | 12 |
| ENSOARG0000003062  | TM9SF4  | 60954424 | 60985439 | 13 | ENSOARG00000005190 | ACTRT2        | 48089727 | 48090860 | 12 | ENSOARG00000023516 | SNORA36B | 21811325 | 21811456 | 12 |
| ENSOARG00000015308 | CNBD2   | 64673075 | 64723487 | 13 | ENSOARG00000009688 |               | 42897047 | 43151892 | 12 | ENSOARG00000025437 |          | 23567301 | 23687517 | 12 |
| ENSOARG00000018635 | DZANK1  | 37599912 | 37653541 | 13 | ENSOARG00000010714 | USH2A         | 16999001 | 17981947 | 12 | ENSOARG00000025438 |          | 23570015 | 23657488 | 12 |
| ENSOARG00000024427 |         | 9087698  | 9087778  | 13 | ENSOARG00000011000 | DNAJC11       | 44817017 | 44884541 | 12 | ENSOARG00000025467 |          | 73101430 | 73103824 | 12 |
| ENSOARG00000026248 |         | 64684046 | 64849522 | 13 | ENSOARG00000012654 | RAB3GAP2      | 21760318 | 21865369 | 12 | ENSOARG00000013555 |          | 68972583 | 68976410 | 13 |
| ENSOARG00000008034 | MAF     | 5921193  | 5923225  | 14 | ENSOARG00000012720 | IRF6          | 71642946 | 71654633 | 12 | ENSOARG00000005583 |          | 73399575 | 73401407 | 13 |
| ENSOARG00000008495 |         | 50531926 | 50544883 | 14 | ENSOARG00000012918 | TRAF3IP3      | 71661157 | 71680824 | 12 | ENSOARG00000018399 | TTI1     | 66454593 | 66484327 | 13 |
| ENSOARG00000008501 |         | 50559956 | 50563749 | 14 | ENSOARG00000013652 | VAMP4         | 37302039 | 37323489 | 12 | ENSOARG00000018960 | RALGAPB  | 66983273 | 67058489 | 13 |
| ENSOARG00000011355 | BICRA   | 53602524 | 53676728 | 14 | ENSOARG00000018630 | RER1          | 48497785 | 48504352 | 12 | ENSOARG00000019100 | ADIG     | 67064926 | 67070255 | 13 |
| ENSOARG00000011391 | EHD2    | 53684814 | 53699975 | 14 | ENSOARG00000018748 | MORN1         | 48507947 | 48556384 | 12 | ENSOARG00000005978 | ACP7     | 47997870 | 48011505 | 14 |
| ENSOARG00000023231 |         | 50538118 | 50538246 | 14 | ENSOARG00000021674 | U6            | 62994383 | 62994485 | 12 | ENSOARG00000011673 |          | 54045348 | 54057456 | 14 |
| ENSOARG00000026909 |         | 23102469 | 23275357 | 14 | ENSOARG00000022000 |               | 73782644 | 73782731 | 12 | ENSOARG00000011682 |          | 54063550 | 54086186 | 14 |
| ENSOARG00000010872 | OR9I1   | 78493970 | 78662782 | 15 | ENSOARG00000023516 | SNORA36B      | 21811325 | 21811456 | 12 | ENSOARG00000017887 | RPGRIP1L | 21426273 | 21521065 | 14 |
| ENSOARG00000011446 |         | 79226138 | 79261515 | 15 | ENSOARG00000024409 | oar-mir-29b-1 | 73782083 | 73782166 | 12 | ENSOARG00000017939 | FTO      | 21524991 | 21953995 | 14 |
| ENSOARG00000012905 | OR9Q2   | 78588099 | 78589037 | 15 | ENSOARG00000024729 |               | 63718660 | 63718749 | 12 | ENSOARG00000005911 | INSC     | 36936849 | 37000817 | 15 |
| ENSOARG00000013164 |         | 80389134 | 80412010 | 15 | ENSOARG00000025437 |               | 23567301 | 23687517 | 12 | ENSOARG00000008069 | TEAD1    | 39369981 | 39631064 | 15 |
| ENSOARG00000013240 | ACER3   | 54380118 | 54544096 | 15 | ENSOARG00000025438 |               | 23570015 | 23657488 | 12 | ENSOARG00000008298 | PARVA    | 39785022 | 39847574 | 15 |
| ENSOARG00000015424 | C1QTNF5 | 29389458 | 29390834 | 15 | ENSOARG00000006091 |               | 73855033 | 73868280 | 13 | ENSOARG00000010050 | GALNT18  | 40834788 | 41017549 | 15 |
| ENSOARG00000015673 | MFRP    | 29390596 | 29396511 | 15 | ENSOARG00000011254 | NDUF4F5       | 6872875  | 6909267  | 13 | ENSOARG00000011592 | GLYATL2  | 79280017 | 79288198 | 15 |
| ENSOARG00000015942 | USP2    | 29405834 | 29421267 | 15 | ENSOARG00000011461 | SEL1L2        | 6917382  | 7009037  | 13 | ENSOARG00000013785 | C11orf53 | 20958217 | 20998001 | 15 |
| ENSOARG00000017054 | RNF26   | 29385024 | 29386343 | 15 | ENSOARG00000017498 | PCK1          | 57900057 | 57905307 | 13 | ENSOARG00000013805 | COLCA2   | 21009691 | 21017209 | 15 |
| ENSOARG00000019097 | IFTAP   | 65231458 | 65301531 | 15 | ENSOARG00000017959 | RAE1          | 58073348 | 58092870 | 13 | ENSOARG00000014095 | ANO3     | 55194747 | 55486464 | 15 |
| ENSOARG00000026816 |         | 22387770 | 22390565 | 15 | ENSOARG00000018002 | SPO11         | 58100842 | 58115189 | 13 | ENSOARG00000015999 | IMMP1L   | 60430839 | 60496840 | 15 |

|                    |          |          |          |    |                    |         |          |          |    |                    |            |          |          |    |
|--------------------|----------|----------|----------|----|--------------------|---------|----------|----------|----|--------------------|------------|----------|----------|----|
| ENSOARG0000005717  |          | 44809323 | 44809910 | 16 | ENSOARG00000018399 | TTI1    | 66454593 | 66484327 | 13 | ENSOARG00000018423 | UBASH3B    | 32853387 | 33003019 | 15 |
| ENSOARG00000008401 | PARP8    | 28331163 | 28521803 | 16 | ENSOARG00000005978 | ACP7    | 47997870 | 48011505 | 14 | ENSOARG00000005937 | MAST4      | 12421835 | 13041016 | 16 |
| ENSOARG00000010729 | SLC1A3   | 37483723 | 37563198 | 16 | ENSOARG00000007080 |         | 2787215  | 3071357  | 14 | ENSOARG00000010187 | WDR70      | 36614984 | 36892613 | 16 |
| ENSOARG00000012630 | CDH6     | 42084521 | 42144160 | 16 | ENSOARG00000011673 |         | 54045348 | 54057456 | 14 | ENSOARG00000014702 | ADCY2      | 65280195 | 65721184 | 16 |
| ENSOARG00000012793 |          | 48883132 | 48884676 | 16 | ENSOARG00000011682 |         | 54063550 | 54086186 | 14 | ENSOARG00000003364 | DDX55      | 51651684 | 51668573 | 17 |
| ENSOARG00000001443 | FSTL5    | 35976685 | 36901504 | 17 | ENSOARG00000017887 | RPGRI1L | 21426273 | 21521065 | 14 | ENSOARG00000006474 | GLRB       | 41763480 | 41856985 | 17 |
| ENSOARG00000011798 | INPP4B   | 15088639 | 15543935 | 17 | ENSOARG00000017939 | FTO     | 21524991 | 21953995 | 14 | ENSOARG00000017566 |            | 71881383 | 72067452 | 17 |
| ENSOARG00000013508 |          | 70559502 | 70862523 | 17 | ENSOARG00000005911 | INSC    | 36936849 | 37000817 | 15 | ENSOARG00000025722 |            | 71986609 | 71987687 | 17 |
| ENSOARG00000014207 | ADORA2A  | 70859260 | 70868363 | 17 | ENSOARG00000007202 | SPON1   | 38044689 | 38354554 | 15 | ENSOARG00000004861 | STXBP6     | 33919740 | 34146066 | 18 |
| ENSOARG00000015506 | STX2     | 45920664 | 45945399 | 17 | ENSOARG00000010050 | GALNT18 | 40834788 | 41017549 | 15 | ENSOARG00000000381 |            | 47798272 | 47835571 | 19 |
| ENSOARG00000017120 | TMEM132B | 49885384 | 50186678 | 17 | ENSOARG00000011592 | GLYATL2 | 79280017 | 79288198 | 15 | ENSOARG00000005680 | WDR82      | 48598004 | 48612296 | 19 |
| ENSOARG00000007087 |          | 44166626 | 44194878 | 18 | ENSOARG00000014095 | ANO3    | 55194747 | 55486464 | 15 | ENSOARG00000005786 |            | 48617258 | 48622991 | 19 |
| ENSOARG00000009711 | CERS3    | 5141549  | 5358514  | 18 | ENSOARG00000014873 |         | 21546689 | 21652451 | 15 | ENSOARG00000005975 | TWF2       | 48631479 | 48639397 | 19 |
| ENSOARG00000009906 | TTC23    | 6609859  | 6721193  | 18 | ENSOARG00000015999 | IMMP1L  | 60430839 | 60496840 | 15 | ENSOARG00000007668 | GRM7       | 18544027 | 19149524 | 19 |
| ENSOARG00000009990 |          | 6726371  | 6750105  | 18 | ENSOARG00000017917 | GRIK4   | 30791427 | 31136076 | 15 | ENSOARG00000009293 | CNTN3      | 27107120 | 27401680 | 19 |
| ENSOARG00000000458 | SFMBT1   | 47861509 | 47970530 | 19 | ENSOARG00000004394 | FAM169A | 6714430  | 6779035  | 16 | ENSOARG00000009783 |            | 31470263 | 31470667 | 19 |
| ENSOARG00000007465 | PLXNA1   | 60171949 | 60201198 | 19 | ENSOARG00000006371 | ADAMTS6 | 14045920 | 14324177 | 16 | ENSOARG00000010162 | SACM1L     | 53478986 | 53532306 | 19 |
| ENSOARG00000008494 |          | 49530241 | 49701797 | 19 | ENSOARG00000014702 | ADCY2   | 65280195 | 65721184 | 16 | ENSOARG00000012724 | FLNB       | 43152605 | 43292791 | 19 |
| ENSOARG00000009813 | SLC6A20  | 53424967 | 53471152 | 19 | ENSOARG00000003095 |         | 67923976 | 67931604 | 17 | ENSOARG00000014390 | ASB14      | 43836052 | 43850342 | 19 |
| ENSOARG00000010162 | SACM1L   | 53478986 | 53532306 | 19 | ENSOARG00000003364 | DDX55   | 51651684 | 51668573 | 17 | ENSOARG00000014531 | APPL1      | 43854675 | 43876438 | 19 |
| ENSOARG00000003613 | UBR2     | 16358563 | 16459598 | 20 | ENSOARG00000004146 | FBXW7   | 4965419  | 5185723  | 17 | ENSOARG00000024538 | oar-let-7g | 48603621 | 48603703 | 19 |
| ENSOARG00000006254 | DNP1     | 16901274 | 16903616 | 20 | ENSOARG00000019041 | GRK3    | 65098471 | 65205105 | 17 | ENSOARG00000003926 | CARMIL1    | 31188499 | 31494237 | 20 |
| ENSOARG00000006417 | TTBK1    | 16926897 | 16964261 | 20 | ENSOARG00000004861 | STXBP6  | 33919740 | 34146066 | 18 | ENSOARG00000005388 |            | 16742146 | 16747111 | 20 |
| ENSOARG00000006418 | HMGCLL1  | 4979745  | 5104686  | 20 | ENSOARG00000026453 |         | 48601602 | 48649268 | 18 | ENSOARG00000005475 | KLC4       | 16748932 | 16763518 | 20 |
| ENSOARG00000010300 | SUPT3H   | 18310799 | 18706618 | 20 | ENSOARG00000006974 | GRM2    | 49084945 | 49093511 | 19 | ENSOARG00000005603 | KHDRBS2    | 204311   | 1038981  | 20 |
| ENSOARG00000010416 |          | 8003296  | 8006987  | 20 | ENSOARG00000007668 | GRM7    | 18544027 | 19149524 | 19 | ENSOARG00000005654 | PRIM2      | 2673361  | 2977511  | 20 |
| ENSOARG00000010446 | LEMD2    | 8008193  | 8024668  | 20 | ENSOARG00000009293 | CNTN3   | 27107120 | 27401680 | 19 | ENSOARG00000008692 |            | 10643936 | 10644727 | 20 |
| ENSOARG00000012272 | FKBP5    | 9692040  | 9766541  | 20 | ENSOARG00000012724 | FLNB    | 43152605 | 43292791 | 19 | ENSOARG00000010300 | SUPT3H     | 18310799 | 18706618 | 20 |
| ENSOARG00000016687 | KIF6     | 13239546 | 13661152 | 20 | ENSOARG00000014390 | ASB14   | 43836052 | 43850342 | 19 | ENSOARG00000022664 | 5S_rRNA    | 18421702 | 18421834 | 20 |
| ENSOARG00000018718 |          | 48062157 | 48322346 | 20 | ENSOARG00000014531 | APPL1   | 43854675 | 43876438 | 19 | ENSOARG00000026888 |            | 46594647 | 46727238 | 20 |
| ENSOARG00000022664 | 5S_rRNA  | 18421702 | 18421834 | 20 | ENSOARG00000016371 | ARPP21  | 9569024  | 9683317  | 19 | ENSOARG00000005183 | DLG2       | 10779194 | 11743008 | 21 |
| ENSOARG00000002815 | PACS1    | 43458201 | 43604405 | 21 | ENSOARG00000003926 | CARMIL1 | 31188499 | 31494237 | 20 | ENSOARG00000007919 |            | 23117728 | 23624748 | 21 |
| ENSOARG00000003296 | KLC2     | 43616119 | 43624384 | 21 | ENSOARG00000005654 | PRIM2   | 2673361  | 2977511  | 20 | ENSOARG0000002088  | GRK5       | 38323057 | 38552331 | 22 |
| ENSOARG00000003523 | RAB1B    | 43626127 | 43634738 | 21 | ENSOARG00000006418 | HMGCLL1 | 4979745  | 5104686  | 20 | ENSOARG00000008134 | SORCS3     | 24298347 | 24944741 | 22 |

|                    |          |          |          |    |                    |          |          |          |    |                    |          |          |          |    |
|--------------------|----------|----------|----------|----|--------------------|----------|----------|----------|----|--------------------|----------|----------|----------|----|
| ENSOARG0000003549  | CNIH2    | 43635150 | 43640422 | 21 | ENSOARG00000008945 |          | 28551893 | 28552753 | 20 | ENSOARG00000005288 | KIAA1328 | 20111910 | 20525120 | 23 |
| ENSOARG0000003628  | YIF1A    | 43641414 | 43645241 | 21 | ENSOARG00000008954 |          | 28557828 | 28558730 | 20 | ENSOARG00000005828 | NOL4     | 23148484 | 23611340 | 23 |
| ENSOARG0000003837  | TMEM151A | 43647082 | 43651665 | 21 | ENSOARG00000009595 | CDKAL1   | 35755504 | 36365789 | 20 | ENSOARG00000023248 |          | 52091263 | 52091341 | 23 |
| ENSOARG00000013080 | DOCK1    | 45364051 | 45875506 | 22 | ENSOARG00000013288 | PKHD1    | 23851546 | 24291885 | 20 | ENSOARG00000004594 |          | 40504639 | 40511497 | 24 |
| ENSOARG00000013216 | PCDH15   | 4372641  | 5337209  | 22 | ENSOARG00000013835 | PHACTR1  | 42250178 | 42485827 | 20 | ENSOARG00000004697 | IQCE     | 40511246 | 40551800 | 24 |
| ENSOARG00000015307 | PANK1    | 10990194 | 11046738 | 22 | ENSOARG00000023426 |          | 42320808 | 42320894 | 20 | ENSOARG00000010673 |          | 28285509 | 28426315 | 24 |
| ENSOARG00000004215 | NFATC1   | 748323   | 799990   | 23 | ENSOARG00000026888 |          | 46594647 | 46727238 | 20 | ENSOARG00000011276 |          | 32699946 | 32762145 | 24 |
| ENSOARG00000005109 | WDR7     | 56218845 | 56550504 | 23 | ENSOARG00000007919 |          | 23117728 | 23624748 | 21 | ENSOARG00000011868 | EIF4H    | 33115721 | 33286879 | 24 |
| ENSOARG00000009572 | METTL4   | 37178727 | 37203415 | 23 | ENSOARG00000006805 | CFAP43   | 23775242 | 23873559 | 22 | ENSOARG00000014703 | MYL10    | 35085594 | 35097624 | 24 |
| ENSOARG00000009604 | NDC80    | 37208585 | 37244969 | 23 | ENSOARG00000015874 | DPYSL4   | 49803446 | 49814634 | 22 | ENSOARG00000014711 | COL26A1  | 35124398 | 35319320 | 24 |
| ENSOARG00000026144 |          | 657340   | 807916   | 23 | ENSOARG00000015957 | SEMA4G   | 20958608 | 20967864 | 22 | ENSOARG00000015554 | POLR3E   | 19838976 | 20025969 | 24 |
| ENSOARG00000018068 |          | 36450665 | 36482827 | 24 | ENSOARG00000016009 | STK32C   | 49813070 | 49828736 | 22 | ENSOARG00000015653 | EEF2K    | 19931674 | 19979917 | 24 |
| ENSOARG00000018283 | CYP3A24  | 36495420 | 36645659 | 24 | ENSOARG00000016032 | MRPL43   | 20963683 | 20971186 | 22 | ENSOARG00000016868 | NYAP1    | 35953645 | 35960797 | 24 |
| ENSOARG00000021762 | SNORA70  | 36478706 | 36478805 | 24 | ENSOARG00000016072 | TWNK     | 20971840 | 20976636 | 22 | ENSOARG00000016889 | TSC22D4  | 35965515 | 35974905 | 24 |
| ENSOARG00000001975 |          | 33053238 | 33156974 | 26 | ENSOARG00000016108 | LZTS2    | 20984288 | 20988117 | 22 | ENSOARG00000016895 | C7orf61  | 35976425 | 35979161 | 24 |
| ENSOARG00000004073 | PSD3     | 37045901 | 37438136 | 26 | ENSOARG00000016146 | PDZD7    | 20989622 | 21007888 | 22 | ENSOARG00000025891 |          | 33169760 | 33290472 | 24 |
| ENSOARG00000006518 | GPM6A    | 6098874  | 6137326  | 26 | ENSOARG00000005288 | KIAA1328 | 20111910 | 20525120 | 23 | ENSOARG00000025893 |          | 35123737 | 35257272 | 24 |
|                    |          |          |          |    | ENSOARG00000005668 | SEC11C   | 58373833 | 58382590 | 23 | ENSOARG00000025902 |          | 40413481 | 40551726 | 24 |
|                    |          |          |          |    | ENSOARG00000005828 | NOL4     | 23148484 | 23611340 | 23 | ENSOARG00000000131 | TEX15    | 25629926 | 25693596 | 26 |
|                    |          |          |          |    | ENSOARG00000005981 | PIGN     | 60716730 | 60819102 | 23 | ENSOARG00000003976 | SH2D4A   | 36739622 | 36795389 | 26 |
|                    |          |          |          |    | ENSOARG00000009530 | YES1     | 35920734 | 35941754 | 23 |                    |          |          |          |    |
|                    |          |          |          |    | ENSOARG00000004594 |          | 40504639 | 40511497 | 24 |                    |          |          |          |    |
|                    |          |          |          |    | ENSOARG00000004697 | IQCE     | 40511246 | 40551800 | 24 |                    |          |          |          |    |
|                    |          |          |          |    | ENSOARG00000010673 |          | 28285509 | 28426315 | 24 |                    |          |          |          |    |
|                    |          |          |          |    | ENSOARG00000011276 |          | 32699946 | 32762145 | 24 |                    |          |          |          |    |
|                    |          |          |          |    | ENSOARG00000015554 | POLR3E   | 19838976 | 20025969 | 24 |                    |          |          |          |    |
|                    |          |          |          |    | ENSOARG00000015653 | EEF2K    | 19931674 | 19979917 | 24 |                    |          |          |          |    |
|                    |          |          |          |    | ENSOARG00000016868 | NYAP1    | 35953645 | 35960797 | 24 |                    |          |          |          |    |
|                    |          |          |          |    | ENSOARG00000016889 | TSC22D4  | 35965515 | 35974905 | 24 |                    |          |          |          |    |
|                    |          |          |          |    | ENSOARG00000016895 | C7orf61  | 35976425 | 35979161 | 24 |                    |          |          |          |    |
|                    |          |          |          |    | ENSOARG00000025880 |          | 17739739 | 17741901 | 24 |                    |          |          |          |    |
|                    |          |          |          |    | ENSOARG00000025902 |          | 40413481 | 40551726 | 24 |                    |          |          |          |    |
|                    |          |          |          |    | ENSOARG00000004227 | CCDC6    | 15389097 | 15444034 | 25 |                    |          |          |          |    |

|                    |         |          |          |    |
|--------------------|---------|----------|----------|----|
| ENSOARG00000006382 | UNC5B   | 27264279 | 27284918 | 25 |
| ENSOARG00000006506 | SLC29A3 | 27298129 | 27343049 | 25 |
| ENSOARG00000021769 |         | 23978131 | 23978273 | 25 |
| ENSOARG00000026405 |         | 18960060 | 19006408 | 25 |

**Supplementary Table S5.** Estimates of Runs of Homozygosity (ROH) for each population in five different length categories

|         | AFS  | ARB  | BGA  | BGE  | BLO  | CHA  | GAR  | GDK  | IBL  | IDC  | LOR  | MOG  | QEZ  | ZEL  |
|---------|------|------|------|------|------|------|------|------|------|------|------|------|------|------|
| 0-2 Mb  | 1136 | 730  | 2079 | 2303 | 817  | 1285 | 2528 | 753  | 2341 | 1606 | 1656 | 1052 | 1102 | 1840 |
| 2-4 Mb  | 280  | 187  | 1070 | 1109 | 208  | 431  | 1437 | 179  | 1308 | 440  | 502  | 214  | 277  | 419  |
| 4-8 Mb  | 113  | 65   | 451  | 354  | 32   | 150  | 438  | 52   | 991  | 38   | 134  | 46   | 51   | 56   |
| 8-16 Mb | 107  | 16   | 196  | 158  | 12   | 116  | 131  | 26   | 577  | 15   | 60   | 34   | 46   | 26   |
| <16 Mb  | 66   | 2    | 85   | 181  | 3    | 95   | 71   | 8    | 190  | 10   | 23   | 20   | 31   | 22   |
| Sum     | 1702 | 1000 | 3881 | 4105 | 1072 | 2077 | 4605 | 1018 | 5407 | 2109 | 2375 | 1366 | 1507 | 2363 |

Supplementary **Figure S1**. Principal components analysis (PC 1 and PC 2) of among 14 sheep breeds based on autosomes. For breed abbreviations, see Table 1.

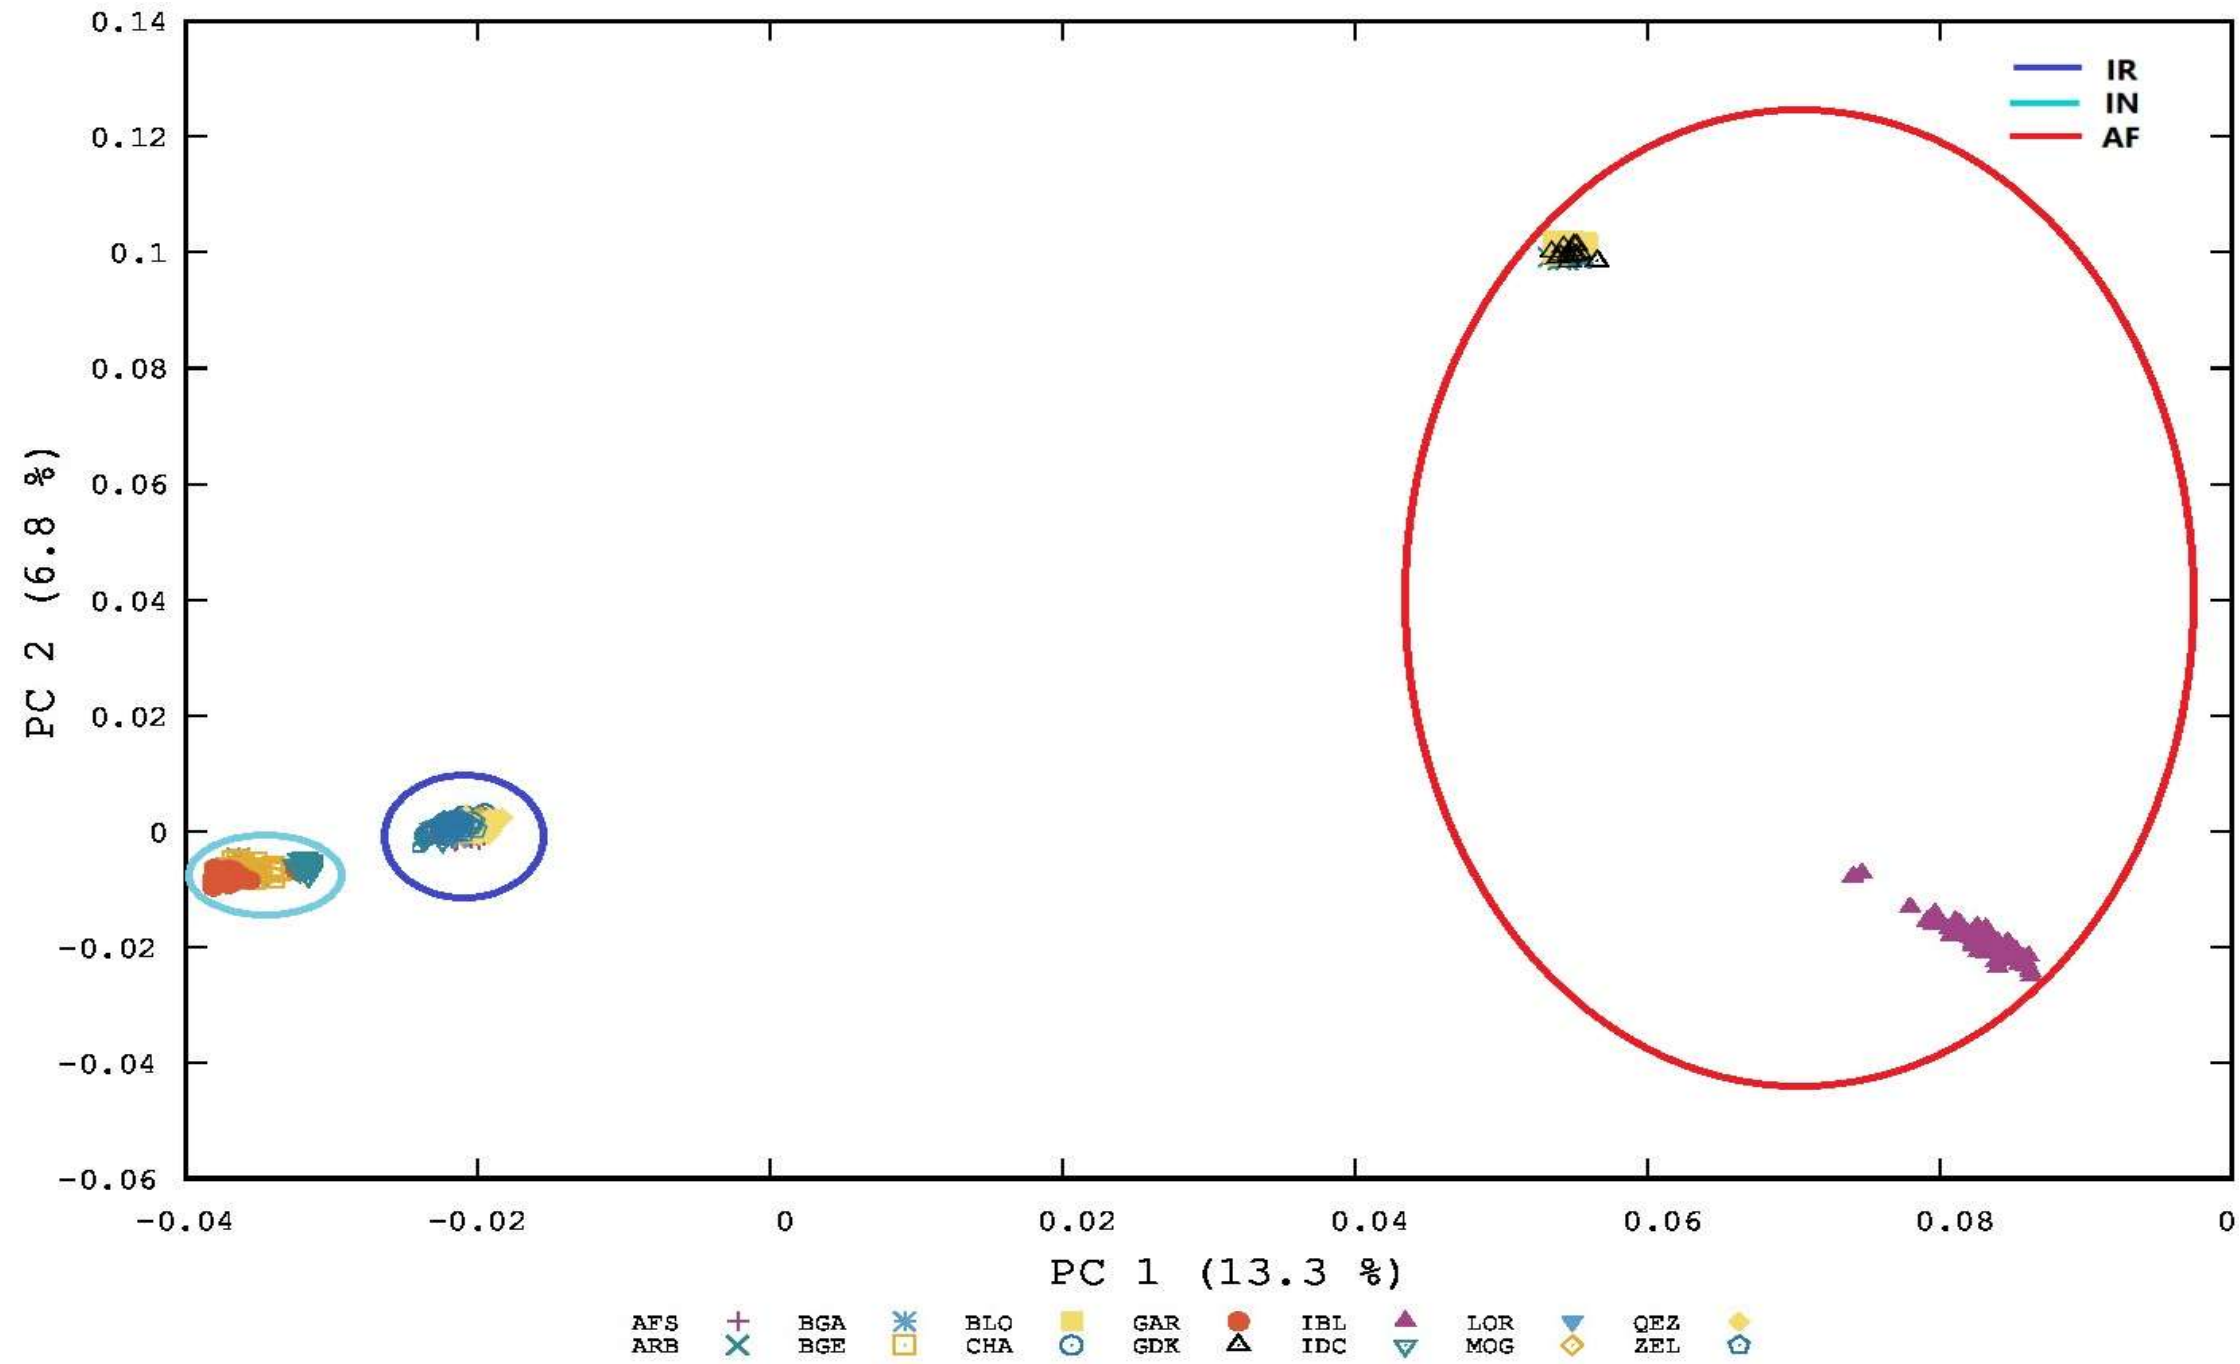



Supplementary **Figure S2**. Principal components analysis (PC 1 and PC 2) of among 10 IR and IN sheep breeds based on autosomes. For breed abbreviations, see Table 1.

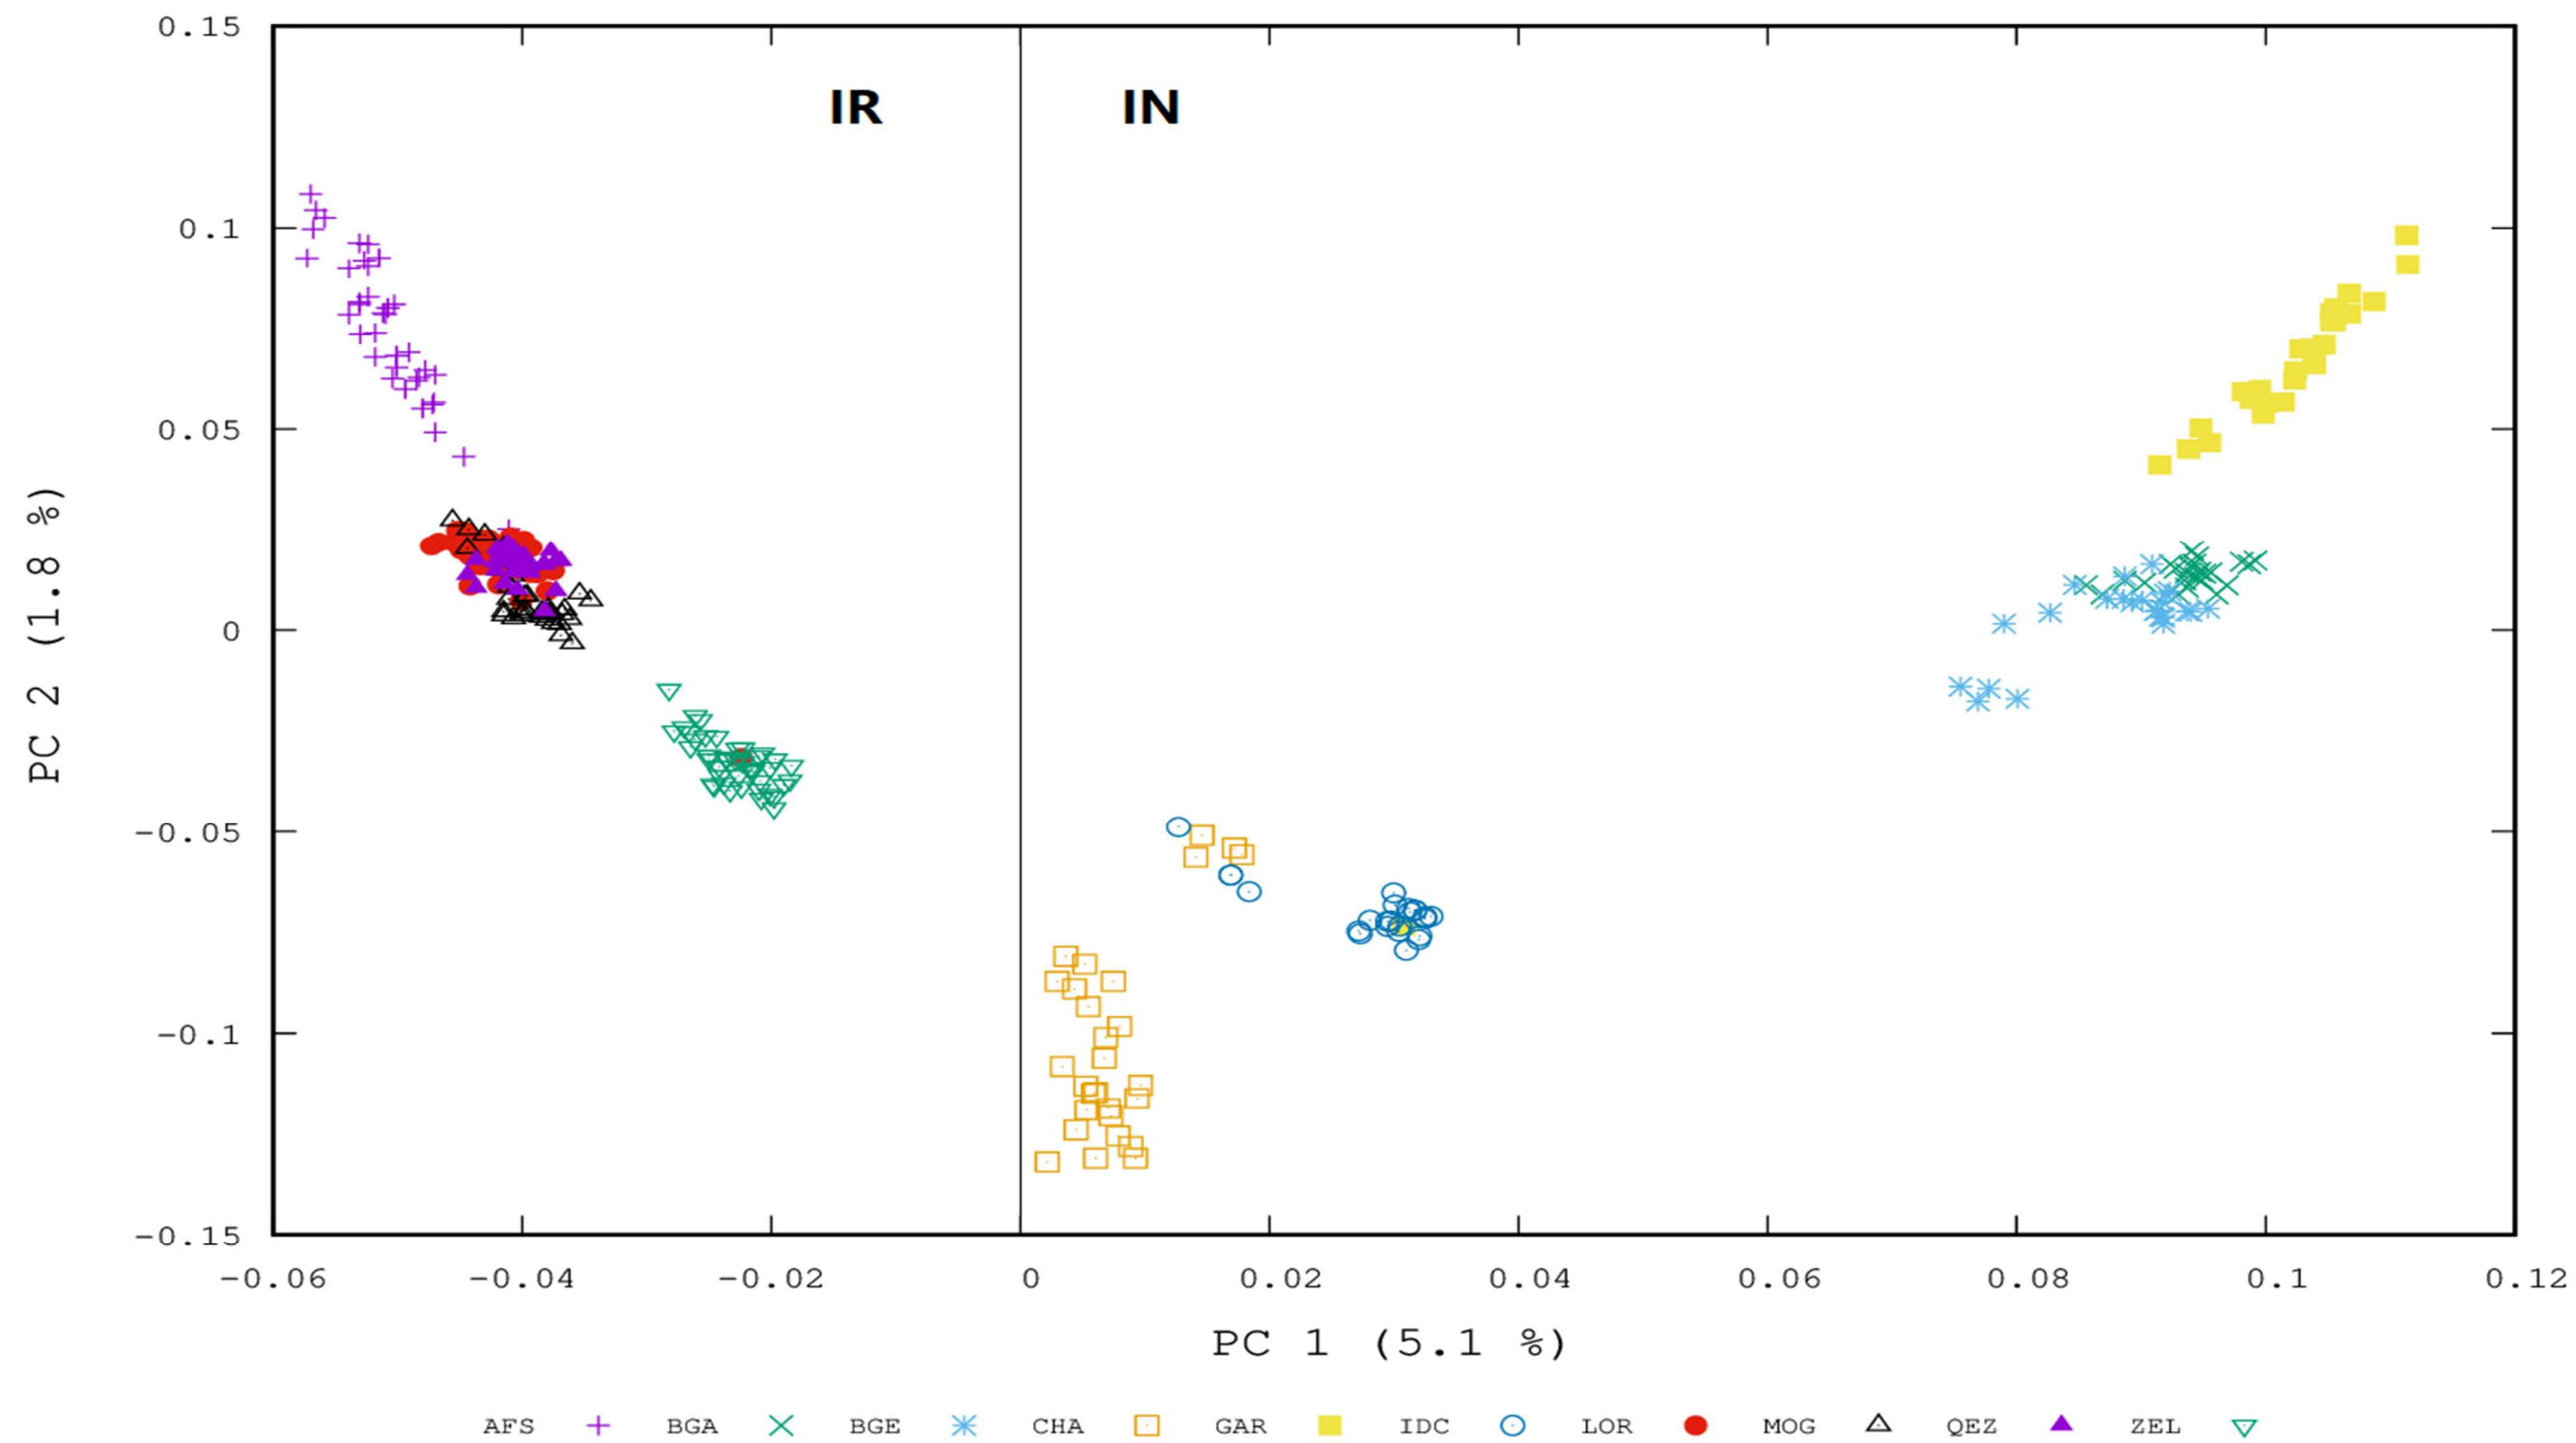

Supplementary **Figure S3**. Linkage disequilibrium decay of the IR (blue), IN (green), and AF(red) sheep breeds.

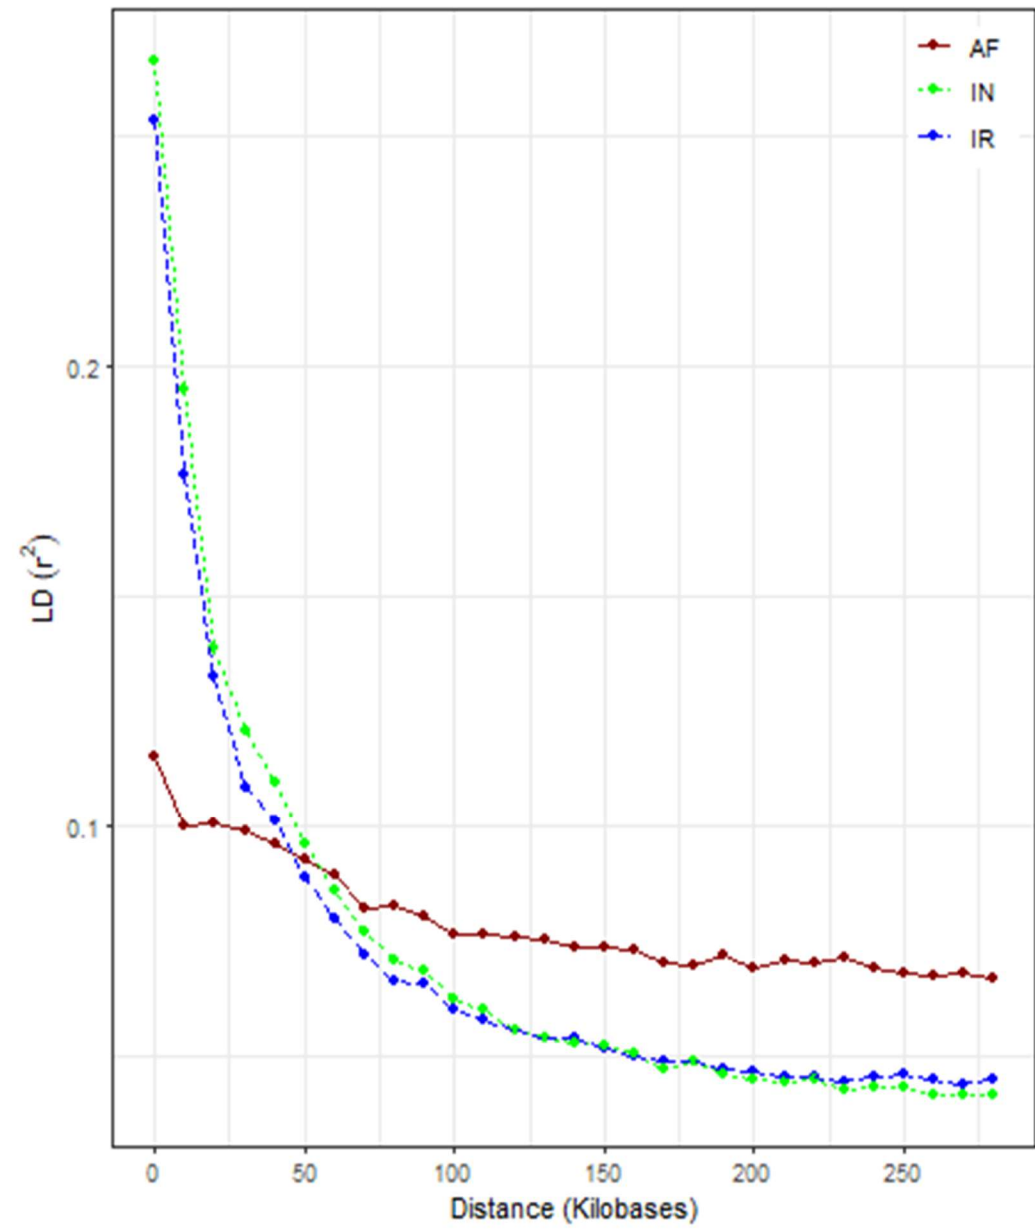

Supplementary Figure S4. The history of inbreeding coefficient in all populations base on the length distribution of ROH segments. For breed abbreviations see Table 1.

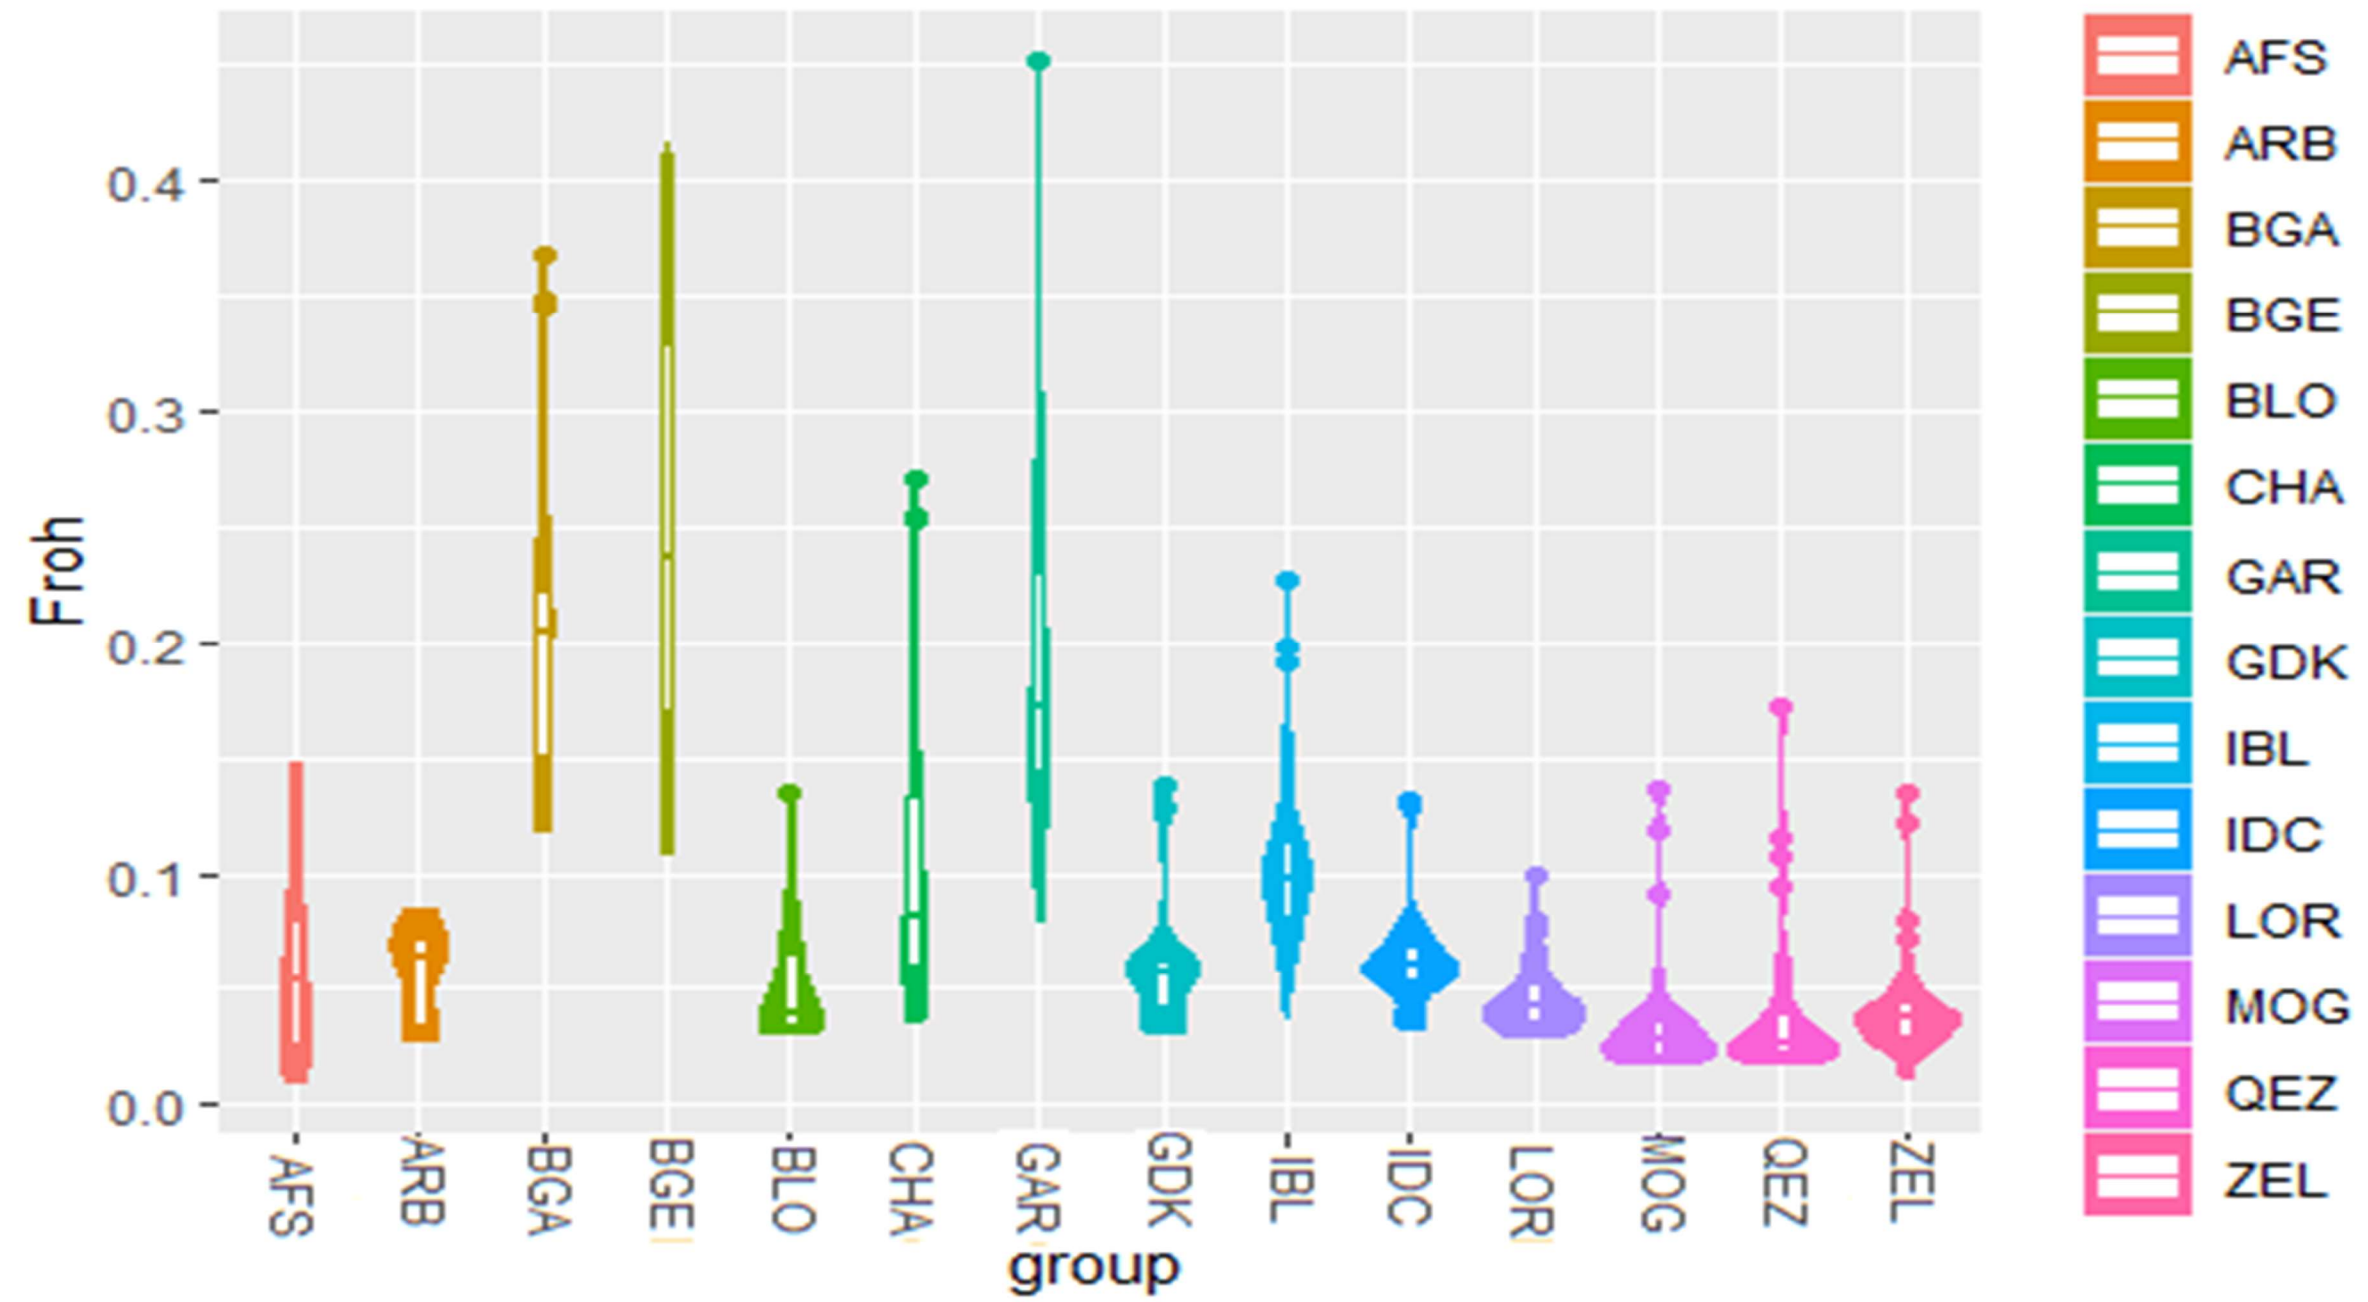

Supplement: 41598_2021_82625_MOESM1_ESM.pdf [file 41598_2021_82625_MOESM1_ESM.pdf]
